1 eLife Title: A calcineurin-mediated scaling mechanism that controls a K<sup>+</sup>-leak channel to  
2 regulate morphogen and growth factor transcription

3

4 Chao Yi<sup>1,2</sup>, Tim WGM Spitters<sup>1\*</sup>, Ezz Al-Din Ahmed Al-Far<sup>3\*</sup>, Sen Wang<sup>1,2</sup>, Tian Long  
5 Xiong<sup>1,2</sup>, Simian Cai<sup>1</sup>, Xin Yan<sup>1</sup>, Kaomei Guan<sup>3</sup>, Michael Wagner<sup>3,4</sup>, Ali El-Armouche<sup>3</sup> and  
6 Christopher L. Antos<sup>1,3†</sup>

7 <sup>1</sup>School of Life Sciences and Technology, ShanghaiTech University, 230 Haik Road,  
8 Shanghai, People's Republic of China.

9 <sup>2</sup>CAS Center for Excellence in Molecular Cell Science, Shanghai Institute of Biochemistry  
10 and Cell Biology, Chinese Academy of Sciences, University of Chinese Academy of Sciences

11 <sup>3</sup>Institut für Pharmakologie und Toxikologie, Technische Universität Dresden, Fetscherstraße  
12 74, 01307 Dresden, Germany

13 <sup>4</sup>Klinik für Innere Medizin und Kardiologie, Herzzentrum Dresden, Technische Universität  
14 Dresden, Fetscherstraße 76, 01307 Dresden, Germany

15 \*These two authors contributed equally.

16

17 Running Title: Kcnk5b coordination of developmental transcription

18

19 Key words: regeneration, development, zebrafish appendages, proportional growth,  
20 membrane potential, morphogens

21

22 †Corresponding Author:

23 Christopher L. Antos

24 School of Life Sciences and Technology

25 ShanghaiTech University,

26 230 Haik Road

27 Pudong, New District,

28 Shanghai, China 201210

29 [clantos@shanghaitech.edu.cn](mailto:clantos@shanghaitech.edu.cn)

30

31 **Abstract**

32 The increase in activity of the two-pore potassium-leak channel Kcnk5b maintains allometric  
33 juvenile growth of adult zebrafish appendages. However, it remains unknown how this channel  
34 maintains allometric growth and how its bioelectric activity is regulated to scale these  
35 anatomical structures. We show the activation of Kcnk5b is sufficient to activate several genes  
36 that are part of important development programs. We provide *in vivo* transplantation evidence  
37 that the activation of gene transcription is cell autonomous. We also show that Kcnk5b will  
38 induce the expression of different subsets of the tested developmental genes in different  
39 cultured mammalian cell lines, which may explain how one electrophysiological stimulus can  
40 coordinately regulate the allometric growth of diverse populations of cells in the fin that use  
41 different developmental signals. We also provide evidence that the post-translational  
42 modification of serine 345 in Kcnk5b by calcineurin regulates channel activity to scale the fin.  
43 Thus, we show how an endogenous bioelectric mechanism can be regulated to promote  
44 coordinated developmental signaling to generate and scale a vertebrate appendage.

## 45 **Introduction**

46 Tissue scaling involves the coordinated control of developmental programs, since  
47 anatomical structures consist of different tissues that form in a coordinated manner and grow  
48 proportionally with each other and with the body. While there are several developmental signals  
49 known to regulate cell proliferation and tissue formation, mechanisms that concomitantly  
50 activate several developmental signals to synchronize the growth of multi-tissue appendages  
51 and organs in a manner that is coordinated with body proportions remain poorly defined.

52 There is growing evidence that several biological phenomena involved in tissue  
53 generation and growth are influenced by electrophysiological changes in “non-excitable” cells  
54 (Sundelacruz et al., 2009). Several cell behaviors are affected by the addition of electric currents  
55 (McCaig et al., 2005): cell migration, cell proliferation, cell differentiation, gene transcription  
56 and consequently tissue formation are all altered by the application of an exogenous current  
57 (Baer and Colello, 2016; Bartel et al., 1989; Blackiston et al., 2009; Borgens et al., 1977;  
58 Geremia et al., 2007; Sundelacruz et al., 2009; Yasuda, 1974; Zhao et al., 2002). The  
59 culmination of these findings have led to the hypothesis that bioelectrical fields exist that have  
60 higher order organizational non-cell-autonomous properties in the development of anatomical  
61 structures [For review, see (Levin, 2014; Messerli and Graham, 2011)].

62 As a regulator of membrane potential,  $K^+$  conductance is an important component of the  
63 electrophysiological properties of cells. Evidence that illustrates the importance of  $K^+$   
64 conductance in tissue formation comes from studies in which disruption of inward rectifying  
65  $K^+$  channels of the Kir2 family can cause cranial facial defects, abnormal number of digits and  
66 reduced digit size (Andersen et al., 1971; Canun et al., 1999; Sansone et al., 1997; Tawil et al.,  
67 1994; Yoon et al., 2006a; Yoon et al., 2006b; Zaritsky et al., 2000). A striking finding  
68 concerning the coordinated control of cell behavior is the formation of eye structures by  
69 overexpressing different ion channels that alter membrane potential in early *Xenopus* embryos  
70 (Pai et al., 2012): overexpression and activation of a glycine-gated chloride channel in cells that  
71 form the eye interferes with eye formation, while overexpression of a dominant-negative  $K^+$ -  
72 ATP channel simulates ectopic eye formation even in unexpected locations on the body (Pai et  
73 al., 2012). These findings illustrate that changes in the membrane potential of cells can have  
74 significant impacts on the development of anatomical structures. However, how  
75 electrophysiological information associates with the multiple necessary signals that control  
76 formation and/or growth of multi-tissue structures remains unclear.

77           The development of body structures not only involves forming tissues, it also involves  
78 coordinating the growth of each contributing tissue cell. To form organs that correctly scale  
79 with the body, each tissue grows either isometrically (grows with the same rate as the body) or  
80 allometrically (disproportionally grows in relation to the growth of the body). The zebrafish  
81 mutants *another long fin (alf)*, *long fin (lof)* and *schleier (schl)* display continued allometric  
82 growth of each appendage from the juvenile stage into the adult stage (Lanni et al., 2019;  
83 Perathoner et al., 2014; Stewart et al., 2020). The dominant allometric growth phenotype of *alf*  
84 is due to mutations in the transmembrane pore region of *kcnk5b* (Perathoner et al., 2014),  
85 encoding a two-pore K<sup>+</sup>-leak channel that regulates membrane potential by outward flow of K<sup>+</sup>  
86 from the cell (Goldstein et al., 2001). The dominant phenotype of *lof* is linked to elevated  
87 expression of a voltage-gated potassium channel *Kcnh2a* (Stewart et al., 2020). The phenotype  
88 of *schl* is due to dominant-negative mutations in *scc4* (Lanni et al., 2019), encoding a K<sup>+</sup>-Cl<sup>-</sup>  
89 cotransporter that regulates intracellular K<sup>+</sup> levels in a chloride-dependent manner (Marcoux et  
90 al., 2017). *alf*, *lof* and *schl* demonstrate the importance of K<sup>+</sup> conductance and ultimately of  
91 electrophysiological signals for the correct body-to-appendage proportions. Despite the  
92 connection between K<sup>+</sup> conductance and the proportional growth of the fins, it remains unclear  
93 how K<sup>+</sup>-mediated signal translates into coordinated growth of the fish appendage and how any  
94 K<sup>+</sup> channel is regulated to scale tissue.

95           We show that activity of the single two-pore K<sup>+</sup>-leak channel *Kcnk5b* is sufficient to  
96 induce the activation of at least two components, *Shh* and *Lef1*, of two important morphogen  
97 pathways, not only in the adult fin but also in the larva. Our data also indicates that this  
98 induction is cell autonomous, arguing that increases in membrane potential caused by *Kcnk5b*  
99 regulate growth through intracellular regulation of these developmental pathways.  
100 Overexpression of *kcnk5b* or one of two other two-pore *kcnk* channels in different mammalian  
101 cell lines showed variable activation of genes belonging to different developmental signal  
102 transduction mechanisms, supporting the conclusions that the different developmental  
103 mechanisms needed to scale fish appendages can be regulated by the same electrophysiological  
104 change induced by potassium leak and that the combinatorial activation of the different  
105 developmental mechanisms by *Kcnk5b* is cell-type dependent. Lastly, we provide evidence for  
106 how post-translational modification of *Kcnk5b* at Serine345 by calcineurin regulates its  
107 electrophysiological activity and consequently the scaling of zebrafish fins. Thus, we describe  
108 an endogenous cell-autonomous mechanism through which electrophysiological signals can  
109 induce and coordinate specific morphogen and growth factor signals to mediate the scaling of  
110 an anatomical structure.

## 112 Results

### 113 **Kcnk5b is sufficient to induce several developmental gene programs in different cell types** 114 **in adult and larva.**

115 Mutations in the two-pore K<sup>+</sup>-leak channel *Kcnk5b* that increase its activity lead to  
116 enhanced growth of the zebrafish appendages (Perathoner et al., 2014). While this finding  
117 implicates the importance of bioelectric signaling in appendage scaling, it remains unknown  
118 how the activity of a single K<sup>+</sup> channel is integrated with the developmental controls that  
119 generate new appendage tissues. Growth of any appendage involves the coordinated activation  
120 of specific morphogen and growth factor pathways: Shh,  $\beta$ -catenin-dependent Wnt, Bmp, Fgf  
121 and Retinoic acid. Therefore, to begin to determine how this channel is involved in the  
122 coordinated growth of the entire fin, we generated transgenic zebrafish that expresses *kcnk5b*  
123 under the control of a conditionally inducible promoter (heat-shock promoter) to temporally  
124 activate this channel in adult fins. After a single ten-minute heat-shock pulse of the  
125 Tg[*hsp70:kcnk5b*-GFP] transgene, we observed significant activation of *shh* and *lef1* ( $\beta$ -  
126 catenin-dependent Wnt) (Fig. 1Aa; Fig.1-Suppl. Fig. 1A), as well as an increase in *aldh1a2*  
127 (retinoic acid) (Fig. 1Ab) within 6 hours by qRT-PCR, while *pea3* (Fgf) was slightly increased  
128 and *msxb* (BMP) was not significantly changed (Fig. 1A). All genes returned to control levels  
129 by 12 hours after the single pulse (Fig. 1B). The induction of the developmental genes coincided  
130 with the temporal expression of the *kcnk5b*-GFP transgene (Fig. 1C), whose expression  
131 emerged as a lattice pattern(Fig. 1-Suppl. Fig. 1B-D), indicating that Kcnk5b-GFP was  
132 localized and functioned at cell membranes. When we maintained chronic expression of the  
133 transgene by heat shocking the caudal fin for 10 minutes once per day for 3 days, we observed  
134 expression of *lef1*, *shh*, *aldh1a2* as well as *pea3* and *msxb* over controls (Fig. 1D), which  
135 included Shh's patched receptors and slight up-regulation of *bmp2b* (Fig. 1-Suppl. Fig. 1E).  
136 Together, these data show that Kcnk5b is sufficient to induce the transcription of certain  
137 developmental genes as though it were a part of their signaling mechanisms. Furthermore, the  
138 initial activation of *shh*, *lef1* and *aldh2a* (Fig. 1A) followed by later upregulation of *pea3* and  
139 *msxb* after continued *kcnk5b* overexpression (Fig. 1C) suggest that there is a hierarchical  
140 activation of developmental mechanisms that will ultimately lead to the complete allometric  
141 growth program.

142 To examine the spatial expression of the two genes most responsive to Kcnk5b, we  
143 performed *in situ* hybridization experiments for *shh* and *lef1*. Compared to control fins (Fig.  
144 3Ea,c) , localization of *shh* and *lef1* was in the distal tip of the fin (Fig. 1Eb,d) where growth  
145 normally occurs, and cross sections through the fins showed that Kcnk5b-mediated induction

146 of these genes occurred in the epidermal/epithelial tissues (Fig. 1Fb,d). We also assessed  
147 increases in Shh and Lef1 protein levels after the heat-shock induction of *kcnk5b*-GFP (Fig.  
148 1G,H; Fig. 1-Suppl. Fig. 2A,B). Because Lef1 conveys  $\beta$ -catenin-dependent Wnt signaling by  
149 acting as a transcriptional platform for  $\beta$ -catenin, we examined protein expression of  $\beta$ -catenin  
150 and observed no significant differences in its overall levels (Fig. 1G,H; Fig. 1-Suppl. Fig. 2C).  
151 However, when we examined  $\beta$ -catenin protein distribution in the fin tissues by  
152 immunohistochemistry staining, we observed an increased number of nuclei with  $\beta$ -catenin co-  
153 staining in the outer epidermis layers and basal epithelium of the fin (Fig. 1I,J; Fig. 1-Suppl.  
154 Fig. 2E-J) despite no significant differences in the measured  $\beta$ -catenin-associated fluorescence  
155 intensities (Fig. 1-Suppl. Fig. 2K). To test whether the redistribution of  $\beta$ -catenin leads to the  
156 activation of known  $\beta$ -catenin-dependent genes, we performed qRT-PCR of *axin2*, *cyclin D* and  
157 *c-myc*. We observed that none of these candidates were activated (Fig. 1K), which indicates  
158 that while Lef1 expression increases,  $\beta$ -catenin-dependent Wnt signaling is not directly  
159 activated by Kcnk5b. Together, all the expression results indicate that Kcnk5b activity promotes  
160 the transcription of specific components of a limited number of developmental pathways in the  
161 adult fin.

162 To test whether increasing the activity of Kcnk5b has the same transcriptional effect on  
163 these developmental pathways in another *in vivo* context, we induced the expression of *kcnk5b*  
164 in the zebrafish larva (Fig. 2-Suppl. Fig. 1A). We observed that *lefl*, *shh*, *adlh2a*, *pea3* and  
165 *msxb* expression levels were increased by induction of *kcnk5b* compared to heat-shocked non-  
166 transgenic control fish (Fig. 2A). To further explore the effect of Kcnk5b activity on *shh*  
167 transcription in developing fins, we performed *in situ* hybridization experiments on fish  
168 embryos and examined *shh* expression in the developing pectoral fin buds. Compared to the  
169 emerging expression of *shh* in the fin buds of heat-shocked non-transgenic embryos (Fig. 2Ba,c),  
170 we observed *kcnk5b* expression induced increases in the rate of *shh* mRNA detection (Fig.  
171 2Bb,d) and in the area of *shh* expression (Fig. 2Be-h). Thus, Kcnk5b activity appears to increase  
172 both the intensity (Fig. 2Bi) and the range of *shh* expression (Fig. 2Bj). We further assessed  
173 Lef-1-dependent transcription by crossing the heat-shock-inducible transgenic  
174 Tg[*hsp70:kcnk5b*-GFP] line with the transgenic Lef1 reporter line Tg[*7XTCF*-  
175 *Xla.sam*:mCherry]. While the double-transgenic fish Tg[*hsp70:kcnk5b*-GFP; *7XTCF*-  
176 *Xla.sam*:mCherry] displayed limited expression of mCherry before heat-shock induction of the  
177 *kcnk5b*-GFP transgene (Fig. 2Ca,b,g), after heat shock, double-transgenic Tg[*hsp70:kcnk5b*-  
178 GFP; *7XTCF-Xla.sam*:mCherry] fish showed a broad increase in reporter mCherry expression  
179 over single-transgenic Tg[*7XTCF-Xla.sam*:mCherry] (Fig. 2Cd,e,g). From histological cross

180 sections of double-transgenic larva, we observed that mCherry was upregulated broadly in the  
181 body of the animal (Fig. 2D). Furthermore, we observed an increase in the length of the caudal  
182 finfold along the anterioposterior axis of 5 dpf larva after induction of *kcnk5b*-GFP by single  
183 daily 10-minute pulses over 3 days (Fig. 2F; Fig. 2-Suppl. Fig. 1C), while the caudal finfold  
184 lengths along the dorsoventral axis of appeared not change (Fig. 2G). However, we observed  
185 that when we compared both anterioposterior and dorsoventral axes measurements in relation  
186 to body length, we observed that in both instances the finfold dimensions proportionally  
187 increased (Fig. 2H,I), which was in part associated with decreases in the lengths of the bodies  
188 (Fig. 2J). These results showed that in relation to the body, Kcnk5b activity promoted  
189 proportional increases in the finfold dimensions. Our observation that the activity of this  
190 channel decreased the length of the body, suggests that the growth-promoting effects of Kcnk5b  
191 activity may be limited to the finfolds and appendages. Together, these results indicate that  
192 Kcnk5b activity is sufficient to promote the transcription of specific developmental genes in  
193 several different tissue types to promote allometric growth of the finfold.

194

### 195 **Activation of the Lef1-dependent transcription by Kcnk5b is cell autonomous in several** 196 **different tissues**

197 Previous work implicates bioelectric intercellular communication as a mechanism for  
198 how bioelectricity can influence tissue growth (McLaughlin and Levin, 2018), and changes in  
199  $K^+$  channel activity have been shown to regulate different cell behaviors in a non-cell-  
200 autonomous manner (Morokuma et al., 2008; Pai et al., 2015). The broad activation of the Lef1-  
201 dependent Wnt reporter in several tissues (Fig. 2) and Kcnk5b's ability to scale all the tissues  
202 of the fin appendages suggest that Kcnk5b acts via non-cell autonomous communication among  
203 cells. To determine whether the observed Kcnk5b-mediated induction of gene expression is due  
204 to intercellular communication (e.g., through extracellular ligands such as Wnt) or due to cell  
205 autonomous activation of transcription, we transplanted cells from Tg[*hsp70:kcnk5b*-GFP;  
206 *7XTCF-Xla.sam*:mCherry] transgenic embryos into embryos harboring only the Tg[*7XTCF*-  
207 *Xla.sam*:mCherry] transgene and then raised mosaic embryos and larva (Fig. 3A). Analyses of  
208 the mosaic larva showed the previously reported developmental expression of the Lef1-  
209 dependent reporter before heat shock (Fig. 3Ba,e,i,m)(Moro et al., 2012). However, after heat-  
210 shock induction of the Tg[*hsp70:kcnk5b*-GFP] transgene (Fig. 3Bb,f,j,n), we observed ectopic  
211 activation of *7XTCF-Xla.sam*:mCherry reporter only in donor cells of chimeric 48 hpf and 72  
212 hpf fish (recipient *7XTCF-Xla.sam*:mCherry fish harboring transplanted cells from  
213 Tg[*hsp70:kcnk5b*-GFP;*7XTCF-Xla.sam*:mCherry] embryos). GFP-mCherry-positive cells

214 appeared in tissues in the head (Fig. 3Bb,c,d), in skeleton surrounding the eye (Fig. 3Bf,g,h), in  
215 trunk muscles (Fig. 3Bj,k,l) and in skin (Fig. 3Bn,o,p). From closer inspection, we observed co-  
216 expression in neurons in the head (Fig. 3Ca-c), in the ectodermal bones of the skull (Fig. 3Cd-  
217 f), mandible bone and cartilage (Fig. 3Cg-i), mesenchyme surrounding the otic vesicle (Fig.  
218 3Cj-l), epithelial cells in the finfold (Fig 3Co-r) and individual striated muscle cells of the trunk  
219 (Fig. 3Cr-t). We counted the number of GFP and mCherry positive cells in the different tissues  
220 and observed that all *Kcnk5b*-GFP-positive cells were mCherry positive (Fig. 3C). Moreover,  
221 in all tissues, the ectopic mCherry expression was always limited to the *Kcnk5b*-positive cells  
222 (Fig. 3B- E; Fig. 3-Suppl. Fig. 1G-J). Together, these data support two conclusions: one, the  
223 activation of the *Lef1*-dependent reporter by *Kcnk5b* is cell autonomous; and two, *Kcnk5b* is  
224 able to promote the expression of the *Lef1* reporter in diverse tissue types.

225 As a  $K^+$ -leak channel, *Kcnk5b*'s activity should decrease intracellular  $K^+$  levels. We  
226 performed Fluorescence Lifetime Microscopy (FLIM) analysis with an established genetic  
227 sensor for  $K^+$  to measure intracellular  $K^+$  levels (Shen et al., 2019). This sensor uses the FRET  
228 potential between two fluorophores that are joined by a  $K^+$ -binding linker. Changes in FRET  
229 due to  $K^+$  binding results in changes in the fluorescence lifetime of the fluorophores, which  
230 allows for the assessment of intracellular  $K^+$  levels. Transfection of the channel in Human  
231 Embryonic Kidney HEK293T cells (Fig. 4-Suppl. Fig. 1A-L) resulted in significant increase in  
232 CFP fluorescence lifetime due to decreased FRET of the sensor compared to control transfected  
233 cells (Fig. 4Aa-c,g), which indicated reduced intracellular  $K^+$  levels in the cells that express  
234 *Kcnk5b* (Fig. 4Ad-g). Additional higher resolution assessments along the lateral borders of cells  
235 showed similar increases in CFP fluorescence lifetime along the plasma membrane, indicating  
236 expected reduction of  $K^+$  levels at the cell membrane by active *Kcnk5b* (Fig. 4-Suppl. Fig. 1M-  
237 O).

238 To test whether activity *kcnk5b* promotes the gene expression profile in mammalian cells  
239 that we observed in the zebrafish, we expressed *kcnk5b* either by establishing stable HEK293T  
240 (HEK) cells lines that either express GFP or zebrafish *kcnk5b*-GFP or by transient transfections.  
241 From qRT-PCR analyses comparing HEK cells expressing either GFP or *kcnk5b*-GFP, we  
242 observed an increase in SHH and PEA3 expression (Fig. 4Ba; Fig. 4-Suppl. Fig. 2A) and the  
243 down-regulation of LEF1, ALDH1a2 and MSX1 (Fig. 4Bb; Fig. 4-Suppl. Fig. 2B). To  
244 determine whether this transcriptional response is specific to *Kcnk5b* or is a general response  
245 to two-pore  $K^+$ -leak channels, we transfected cells with one of two  $K^+$ -leak channels *Kcnk9* and  
246 *Kcnk10* (Fig. 4-Suppl. Fig 2C,D). Transfection of HEK cells with these two other channels



247 resulted in a similar HEK-cell transcriptional profile as *Kcnk5b* for SHH and FGF (Fig. 4C),  
248 indicating that this transcriptional response to *Kcnk5b* is a response to the electrophysiological  
249 changes associated with intracellular  $K^+$  leak.

250 The differences between the transcriptional responses of the zebrafish adult, larva and  
251 HEK cells indicate that different cell types will have different responses to *Kcnk5b*  
252 electrophysiological activity. Therefore, we examined the transcriptional responses to *Kcnk5b*  
253 in other mammalian cell lines. In HeLa cells, *Kcnk5b* induced PEA3 and LEF (Fig. 4D). In the  
254 N2A (neural carcinoma) cell line, we observed the increase of ALDH1a2 (Fig. 4E) but  
255 decreases in SHH, LEF1 and PEA3 (Fig. 4F). In the MYF7 epithelial carcinoma cell line,  
256 *Kcnk5b* induced ALDH1a2, PEA3 and MSX1 (Fig. 4G).

257 When we tested whether *Kcnk9* and *Kcnk10* produce similar transcription profiles as  
258 *Kcnk5b* in HELA and N2A cells, we observed similar profiles between *Kcnk9* and *Kcnk10*  
259 (Fig. 4H-L), but differences between their outcomes and the transcriptional outcome of *Kcnk5b*.  
260 In HELA cells, the transcriptional response of PEA3 and ALDH2A to *Kcnk9* and -10 were  
261 different than that of *Kcnk5b* (Fig. 4D,I-J). In N2A cells, while we observed similar increases  
262 in *Aldh2A* transcription and similar trends for *Pea3* (Fig. 4E,F,K,L), we also observed the lack  
263 of down regulation of *Shh*, *Lef1* and *Pea3* (Fig. 4E,F,K,L). Together, these results reveal that  
264 *Kcnk* channel activity is sufficient to induce the transcription of genes associated with different  
265 developmental pathways in different mammalian cells types, and indicate that the downstream  
266 consequences of membrane potential changes are not intrinsic to specific signal transduction  
267 pathways. We propose that the variability in gene transcription in different cell types may  
268 explain why the solitary change in the activity of this channel in all cells of the fin leads to the  
269 variable transcriptional responses that promote coordinated growth of a multi-tissue anatomical  
270 structure.

271

## 272 **Calcineurin regulates *Kcnk5b* channel activity and *Kcnk5b*-mediated gene transcription**

273 We previously showed that the phosphatase calcineurin acts as a molecular switch  
274 between isometric and allometric proportional growth of the zebrafish fins (Kujawski et al.,  
275 2014). The similarities in the phenotypes produced by calcineurin inhibition and by the  
276 mutations in *Knck5b* that enhance *Kcnk5b* channel activity suggest a direct functional  
277 relationship between them (Kujawski et al., 2014; Perathoner et al., 2014). Based on whole-cell  
278 patch-clamp experiments, the mutations in *kcnk5b* that maintain allometric growth of the fins

279 also increased  $K^+$  conductance at the plasma membrane (Perathoner et al., 2014). Therefore, we  
280 hypothesized that calcineurin inhibition will increase *in vivo*  $K^+$  conductance and promote  
281 allometric growth of the zebrafish fins (Fig. 5A). To test whether calcineurin alters the channel  
282 activity of Kcnk5b, we examined the activity of Kcnk5b in the presence of calcineurin.  
283 Comparison of whole-cell patch-clamp measurements using HEK cells showed that Kcnk5b  
284 expression increases current density due to  $K^+$  leak from the cells (Fig. 5B), as we observed  
285 from FRET-FLIM intracellular  $K^+$  measurements (Fig. 4A). However, cells co-expressing both  
286 *kcnk5b* and calcineurin decreased the  $K^+$  conductance of the cells compared to cells expressing  
287 *kcnk5b* alone (Fig. 5B). We then tested whether inhibition of the endogenous calcineurin  
288 activity in the HEK cells by the calcineurin inhibitor FK506 affects Kcnk5b channel activity.  
289 We found that FK506 treatment of cells expressing *kcnk5b* resulted in a significant increase in  
290  $K^+$  current compared with DMSO-treated *kcnk5b*-expressing cells (Fig. 5C). These results show  
291 that changes in calcineurin activity alter Kcnk5b channel activity in a manner that is constant  
292 with the enhanced fin growth induced by calcineurin inhibition and the increased channel  
293 activity of the *kcnk5b* zebrafish mutants, which indicates a functional interaction between  
294 calcineurin and Kcnk5b.

295 Calcineurin interacts with its substrates at particular amino acid sequence sites (Grigoriu  
296 et al., 2013). Our analysis of the amino acid sequence in the C-terminal cytoplasmic tail of  
297 Kcnk5b suggests a functional calcineurin binding site (LVIP) is present (Fig. 5A, red letters).  
298 To test for functional interaction at this site, we mutated the amino acid sequence (Fig. 5D, red  
299 letters) and assessed how the mutation affected the ability of calcineurin to regulate the channel.  
300 Compared to the decrease in activity of the wild-type channel after co-transfection with  
301 calcineurin, co-transfection of the Kcnk5b mutant lacking the calcineurin binding site  
302 (Kcnk5bmut+CaN) showed that the mutation made the channel resistant to calcineurin-  
303 mediated inhibition (Fig. 5D). The resistance of the Kcnk5bmut to calcineurin indicated that  
304 the repression of channel activity on Kcnk5b by calcineurin is due to the interaction of these two  
305 proteins at the LVIP site.

306 The regulation of Kcnk5b by calcineurin suggests that changes in calcineurin activity will  
307 have an effect on the Kcnk5b-dependent gene expression. To assess whether the activation of  
308 SHH by Kcnk5b can be altered by calcineurin, we compared the expression of SHH between  
309 HEK cells stably expressing GFP and HEK cells stably expressing the Kcnk5b channel as well  
310 as between HEK cells stably expressing the channel after transfection with calcineurin. We  
311 observed that compared to channel expression alone, co-expression of calcineurin decreased  
312 the Kcnk5b-mediated induction of SHH (Fig. 5E) and PEA3 (Fig. 5F). To determine whether

313 calcineurin effect on *Kcnk5b*-mediated SHH expression is specific to *Kcnk5b*, we transfected  
314 HEK cells with *Kcnk9* or *Kcnk10*. Both *Kcnk9* and *Kcnk10* lack identifiable calcineurin  
315 binding sites (Fig. 4-Suppl. Fig. 2C,D), and we observed that unlike the effect on *Kcnk5b*,  
316 calcineurin had no effect on the induction of SHH (Fig. 5G) or PEA3 (Fig. 5H) by *Kcnk9* or by  
317 *Kcnk10*, indicating that calcineurin's regulation of the electrophysiological induction of SHH  
318 and PEA3 transcription is specific to *Kcnk5b*.

319

### 320 **Calcineurin regulates *Kcnk5b* through S345 to scale the fin**

321 As a phosphatase, calcineurin should regulate *Kcnk5b* by dephosphorylating the channel  
322 at specific serine or threonine residues. A specific serine in the C-terminal tail represented a  
323 typical consensus serine-proline (Ser345-Pro346) phosphorylation site for calcineurin (Fig. 6A).  
324 Therefore, we hypothesized that calcineurin inhibits the activity the *Kcnk5b* channel by  
325 dephosphorylating this serine. We tested whether rendering the *Kcnk5b* channel  
326 unphosphorylatable at this serine by alanine substitution (*S345A*) would decrease the channel's  
327 activity. Whole-cell patch-clamp experiments of the *kcnk5bS345A* showed a significant  
328 decrease in  $K^+$  conductance of the channel compared to the wild-type (*kcnk5bS345*) control  
329 (Fig. 6B). To assess the specificity of the reduction effect for this serine, we also systematically  
330 substituted adjacent serines with alanines and subsequently measured channel activity (Fig. 6-  
331 Suppl. Fig. 1A). While *kcnk5bS345A* showed reduction in activity, the substitution of other  
332 serines did not (Fig. 6C, Fig. 6-Suppl. Fig. 1A-D).

333 To determine whether the activity of the *Kcnk5b* channel is associated with the  
334 phosphorylation state of this serine, we exchanged the serine for a glutamic acid in order to  
335 mimic serine phosphorylation (*kcnk5bS345E*) (Fig. 6C). Expression of this mutant displayed  
336 elevated  $K^+$  conductance compared to *kcnk5bS345* wildtype channel (Fig. 6D). In addition, the  
337 *kcnk5bS345E* mutant was resistant to calcineurin-mediated inhibition (Fig. 6D). Moreover, the  
338 substitution of other serines with glutamic acid had no effect on channel activity, and  
339 calcineurin could still regulated the channel (Fig. 6-Suppl. Fig. 1A,E,F). Together, these results  
340 indicate that S345 is the important post-translational regulatory serine involved in calcineurin-  
341 mediated regulation of *Kcnk5b* activity.

342 To determine whether there is a functional relationship between fin scaling and S345-  
343 mediated *Kcnk5b* channel activity, we placed the cDNA of each channel version (wild-type  
344 *kcnk5bS345*, *kcnk5bS345E* or *kcnk5bS345A*) under the control of the heat-shock inducible  
345 *hsp70* promoter to generate conditionally inducible transgenes for *in vivo* expression in the fish.  
346 We heat shocked the caudal fins of non-transgenic and transgenic fish lines once daily and

347 subsequently measured the length of each fin in relation to the length of each body (fin-to-body  
348 ratio). Non-transgenic siblings were included in the same heat-shock regimen to serve as  
349 controls. After 12 days of the heat-shock regimen, we noticed differences between the rates of  
350 the regenerating caudal fins lobes of the different transgenic lines (Fig. 6E) after standardizing  
351 the length of each fin to the length of the body (Fig. 6-Suppl. Fig. 1G). By assessing  
352 regenerating lobe-to-body measurements over time, we observed that Tg[*hsp70:knk5bS345E*]  
353 fish maintained the highest rates of allometric regenerative growth, while  
354 Tg[*hsp70:knk5bS345A*] displayed the lowest growth rates of the transgenic lines (Fig. 6E).  
355 There was no significant change in the rates of growth of the bodies (Fig. 6-Suppl. Fig. 1G).  
356 We also assess the final proportional size of unamputated fin lobes between the different  
357 transgenic lines, and we observed a linear relationship between the proportional length of the  
358 unamputated lobes and the putative phosphorylation status of the channels: the S345A  
359 dephosphorylation mimic displayed the smallest growth proportions (Fig. 6I), the S345E  
360 phosphorylation mimic displayed the largest growth proportions (Fig. 6I), and the average value  
361 of the wild-type regulatable version of the channel was between the highly active S345E and  
362 marginally active S345A mutants (Fig. 6I).

363 To determine whether similar growth effects are generated by other two-pore K<sup>+</sup> leak  
364 channels, we generated a transgenic fish line that overexpresses *knk9*, Tg[*hsp70:knk9-GFP*].  
365 Compared to transgenic fish that were not heat-shocked (Fig. 6Ja,K) and heat-shocked of non-  
366 transgenic fish (Fig. 6K), we observed that heat-shock-induced overexpression of *knk9* in the  
367 adult fins increased fin outgrowth (Fig. 6Jb,K; Fig. 6-Suppl. Fig. 1H), which further supports  
368 the conclusion that Kcnk5b-mediated growth is due to its regulation of its electrochemical  
369 properties.

370 Our ability to control the rate of growth by mimicking a specific post-translational  
371 modification that can be mediated by calcineurin and that correspondingly determines the level  
372 of Kcnk5b activity supports the conclusion that calcineurin regulation of Kcnk5b is an *in vivo*  
373 electrophysiological mechanism through which controlling the potassium conductance of cells  
374 scales a vertebrate appendage.

## 375 Discussion

376 Anatomical structures consist of a combination of different tissue types that develop and  
377 grow in a coordinated manner. Recent discoveries show that  $K^+$  channels regulate the scaling  
378 of fish appendages, but it is still unclear how this electrophysiological signal controls several  
379 diverse developmental phenomena within this anatomical structure to achieve coordinated  
380 developmental growth. Our results reveal that this *in vivo* electrical signal has a hierarchical  
381 effect on specific developmental genes in the fish fins and larva.

382 Two-pore  $K^+$ -leak channels such as Kcnk5b allow  $K^+$  to cross the membrane to establish  
383 an electrochemical equilibrium, this activity directly affects the membrane potential of the cell  
384 (Goldstein et al., 2001). Normally, the concentration of  $K^+$  is higher on the cytoplasmic side of  
385 the plasma membrane due to continual active transport of  $K^+$  into the cell by the ATP-dependent  
386  $Na^+/K^+$  pumps (Shattock et al., 2015). As a leak channel, opening of Kcnk5b causes a flow of  
387  $K^+$  out of the cell, which hyperpolarizes the membrane potential (Goldstein et al., 2001). The  
388 previous findings that mutations that increase Kcnk5b channel activity are associated with  
389 maintaining allometric growth (Perathoner et al., 2014) argue that such changes in membrane  
390 potential promote disproportional growth. Our current findings further these previous findings  
391 by showing that conditional induction of Kcnk channel activity is sufficient to induce  
392 morphogen pathways (Fig. 1,2,4) in different *in vivo* and *in vitro* contexts, demonstrating  
393 transcriptional control of particular developmental mechanisms by different two-pore  $K^+$ -leak  
394 channels.

395 In addition to  $K^+$ -leak channels, cells regulate intracellular  $K^+$  through different channels  
396 and exchangers. Inward rectifying  $K^+$  channels allow  $K^+$  to enter the cell along the ion's  
397 electrochemical gradient. Exchangers will exchange  $K^+$  with different substrates (e.g.,  $Na^+$ ) to  
398 facilitate the entry or removal of  $K^+$  based on the concentration gradient of  $K^+$  and the  
399 exchanged substrate. Previous findings show the importance of the inward rectifying  $K^+$   
400 channel Kir2 for cranial-facial and digit defects in humans (Andersen et al., 1971; Canun et al.,  
401 1999; Sansone et al., 1997; Tawil et al., 1994; Yoon et al., 2006a; Yoon et al., 2006b). Knockout  
402 of the mouse Kir2 channels results in similar head and digit defects (Zaritsky et al., 2000), and  
403 dominant-negative inhibition of the *Drosophila* Kir2 leads to wing appendage defects that are  
404 analogous to the human and mouse appendage defects (Dahal et al., 2012). While the  
405 mammalian phenotypes remain unexplained, the defects in the *Drosophila* wings have been  
406 linked to reduced Dpp (BMP) signaling (Dahal et al., 2012), suggesting that intracellular  $K^+$   
407 homeostasis is important for BMP signaling.

408 Removal of an ATP-sensitive  $K^+$  channel in the early *Xenopus* embryo disrupts eye  
409 formation, while ectopic expression of this channel will produce ectopic eyes in the head and  
410 in locations that were not considered to be competent for producing eyes (Pai et al., 2012). The  
411 ability to ectopically generate eyes was linked to electrophysiological hyperpolarization of the  
412 cells and the activation of Pax6-eyeless gene (Pai et al., 2012), a master regulator for eye  
413 development (Chow et al., 1999; Halder et al., 1995). In planaria, shortly after wounding,  
414 membrane depolarization acts as an early anterior signal that is sufficient (even when induced  
415 on the posterior side) to promote the consequent formation of all the anterior structures of the  
416 planarian head by inducing notum expression, which inhibits  $\beta$ -catenin-dependent Wnt signal  
417 transduction (Durant et al., 2019). Furthermore, it was recently revealed that in the *Drosophila*  
418 wing discs, depolarization events promote membrane localization of the transmembrane  
419 receptor smoothed to promote Shh signaling and that membrane potential values are  
420 patterned within the wing disc (Emmons-Bell and Hariharan, 2021). These discoveries show  
421 that electrophysiological changes are important signals in the formation and growth of  
422 anatomical structures.

423 A recent finding showed that calcineurin inhibition or increased activity of the voltage-  
424 gated *Kcnh2* channel (*lof* mutant) promotes regenerative outgrowth from the proximal side of  
425 a mid-fin excavation, a site that normally does not mount a regenerative outgrowth response  
426 (Cao et al., 2021). Our findings help explain how calcineurin-regulated and electrophysiological  
427 changes from potassium channels can lead to broader tissue organizing phenomena by showing  
428 the inductive effect that increasing  $K^+$  conductance (and calcineurin's regulation of  $K^+$   
429 conductance) can have on a broad number of developmental pathways, which is important for  
430 coordinating the organized formation of tissues and organs. Furthermore, we posit that the  
431 effect of the activity of the *Kcnk5b* channel is broader than the traditional mechanisms of  
432 growth factor/morphogen signaling pathways, because it is not confined to specific signal  
433 transduction mechanisms; rather, it has variable broad effects, such as activation of several  
434 developmental signals in the adult fin (Fig. 1), the larva (Fig. 2) and different mammalian cell  
435 lines (Fig. 4). While we observed that *Kcnk5b* is sufficient to promote *lef1*-mediated  
436 transcription (Figs. 1-3), we did not observe direct activation of *axin2*, a down-stream target  
437 gene of  $\beta$ -catenin activity (Fig. 1-Suppl. Fig. 1C). We posit that *Kcnk5b* activity does not  
438 directly activate canonical Wnt, but primes cells for increased  $\beta$ -catenin activity upon the  
439 reception of a Wnt signal through up-regulation of *Lef1*. Ultimately, continued *Kcnk5b* activity  
440 must lead to increased  $\beta$ -catenin-dependent Wnt signaling, since all evidence indicates that Wnt  
441 signaling is required for allometric fin outgrowth (Kawakami et al., 2006; Stoick-Cooper et al.,

442 2007), and allometric fin growth is the phenotype that we get by *kcnk5b* or *kcnk9*  
443 overexpression in amputated and unamputated fins (Fig. 6E-L). We propose that the  
444 competence to activate different developmental pathways by electrophysiological changes is  
445 because the responding cells are either primed to activate them or the pathways are already  
446 active. It will be important to find out how this electrophysiological signal coordinates the  
447 activity of these developmental signals. In this regard, only few factors are known that regulate  
448 *shh* and *lef1* transcription. Thus, our finding that an electrophysiological mechanism is involved  
449 not only provides a new understanding of how electrophysiology acts as an inductive signal, it  
450 also may lead to the discovery of molecular mechanisms that control the expression of these  
451 mediators of important morphogen signals.

452 The scaling activity of *Kcnk5b* includes all the tissues of the entire appendages of the fish  
453 (Perathoner et al., 2014). Previous findings implicate broader intercellular electrophysiological  
454 gradients as a mechanism for tissue growth (Adams and Levin, 2013). Electrophysiological  
455 measurements of animal tissues show that electric fields are generated and are important *in vivo*  
456 (Borges et al., 1979; Jenkins et al., 1996; McGinnis and Jr., 1986), which suggests the existence  
457 of *in vivo* bioelectric information that regulates physiological phenomena. However, from our  
458 transplantation experiments, we observe that *Kcnk5b*'s effect is cell autonomous (Fig. 3).  
459 Consequently, the question arises about how the activity of this  $K^+$ -leak channel relates to a  
460 broad, coordinated phenotype of scaling the several tissues of the fin. An answer is that the  
461 autonomous transcriptional programs include morphogens. What is unclear is whether a limited  
462 number of cells in the fin control the growth and organizing information so that *Kcnk5b* only  
463 needs to act on a limited number of cell types, or whether *Kcnk5b* regulates proportional growth  
464 at multiple levels and that the cell autonomous transcriptional response that we observe is one  
465 outcome of a combination of intracellular and intercellular responses induced by *Kcnk5b*.

466 Changes in membrane potential from alterations in  $K^+$  conductance are also associated  
467 with the progression through the cell cycle (Blackiston et al., 2009; Urrego et al., 2014), because  
468  $K^+$  channel activity increases at specific cell cycle phases (Urrego et al., 2014), and inhibition  
469 of  $K^+$  channel activity leads to cell cycle arrest in many different tissue cell types (Blackiston  
470 et al., 2009). It is possible that this phenomenon explains part of *Kcnk5b*'s ability to promote  
471 allometric growth. We do not yet know whether other phenomena linked to the activity of  
472 mammalian *Kcnk5* [influence cell tonicity (Niemeyer et al., 2010), metabolic acidosis and  
473 alkalinization (Warth et al., 2004),  $CO_2/O_2$  chemosensing in retrotrapezoid nucleus neurons

474 (Flores et al., 2011) and apoptosis in lymphocytes and neurons (Göb et al., 2015; Nam et al.,  
475 2011)] are involved in appendage scaling.

476 We previously showed that calcineurin inhibition shifts isometric growth to allometric  
477 growth (Kujawski et al., 2014). Subsequently, Daane et al. showed that this effect is reversible  
478 in that removal of calcineurin inhibitors restores isometric growth. The authors also suggest an  
479 alternative mechanism for calcineurin regulation of Kcnk5b in its C-terminus (Daane et al.,  
480 2018); however, their model posits that active calcineurin promotes the activity of Kcnk5b,  
481 which does not yet explain how calcineurin inhibition and increased Kcnk5b activity each  
482 promote allometric growth (Kujawski et al., 2014; Perathoner et al., 2014). In either case, these  
483 data implicate calcineurin as a molecular switch governing isometric versus allometric growth  
484 control. Our findings provide a mechanism for how this switch acts to scale the fish appendages  
485 by directly regulating the activity of Kcnk5b through the dephosphorylation and  
486 phosphorylation of a specific serine (Fig. 7). The ability to mimic or block calcineurin  
487 regulation of this  $K^+$ -leak channel (Fig. 5), whose activity levels directly translate into the extent  
488 of allometric growth (Fig. 6), defines how calcineurin inhibition expands clonal populations  
489 during fin regeneration (Tornini et al., 2016). However, as we observed from both calcineurin  
490 inhibition (Kujawski et al., 2014) and from conditionally inducing Kcnk5b activity (Fig. 6), the  
491 induced allometric growth of the entire fin is more than expanding clonal populations, since the  
492 outcome is not tumorigenesis. Instead, the growth is coordinated among all the tissues (Fig. 6G-  
493 I,K,L) (Kujawski et al., 2014; Perathoner et al., 2014), and our finding that Kcnk5b activates  
494 several developmental pathways (Figs. 1,2,4) argues that calcineurin activity acting on Kcnk5b  
495 regulates more than cell cycle progression.

496 An important next step is to learn how the calcineurin-Kcnk5b circuit is integrated into  
497 the broader mechanisms that scale the appendages. Calcineurin is a  $Ca^{2+}$ -dependent enzyme  
498 which suggests that intracellular  $Ca^{2+}$  is involved in scaling information.  $Ca^{2+}$  is a broad second  
499 messenger that can activate several downstream  $Ca^{2+}$ -dependent enzymes, so broad changes in  
500 its subcellular levels likely have multiple effects. It remains unclear whether there is a specific  
501 intracellular distribution pattern that leads to calcineurin-mediated control of scaling. It is also  
502 possible that  $Ca^{2+}$ -mediated activation of calcineurin—and consequent restoration of isometric  
503 growth—is so dominant that other  $Ca^{2+}$ -mediated activities have little effect.

504 Two mechanisms that regulate proportional growth of organs are vitamin D and Hippo  
505 signaling. Increasing vitamin D signaling enhance the growth of the entire body, including the  
506 fins (Han et al., 2019). We propose that vitamin D is a systemic body signal that ultimately



507 leads to the increase in *Kcnk5b* signaling. It is also possible that this hormone acts  
508 independently of *Kcnk5b*. In *Drosophila*, the Hippo pathway regulates brain size and size of  
509 the imaginal discs (Poon et al., 2016; Rogulja et al., 2008). Mice overexpressing a nuclear  
510 version of the Hippo-signaling component *Yap1* in the adult liver develop significantly enlarged  
511 livers (Camargo et al., 2007; Dong et al., 2007). The Hippo signal transduction pathway consists  
512 of several core components that can be regulated by different factors at plasma membrane and  
513 within the cell (Yu and Guan, 2013), so there are several possible nodes of interaction between  
514 of *Kcnk5b* and Hippo cascade. It is also possible the Hippo-mediated transcription regulates  
515 *kcnk5b* expression or channel activity.

516 Connexin43 also regulates proportional growth of the fins, since mutations that reduce  
517 the intercellular connectivity of connexin43 produce adult fins that are half the size as the fins  
518 of wild-type siblings (Hoptak-Solga et al., 2007; Iovine et al., 2005). The connective nature of  
519 these intercellular junction proteins indicate that direct communication between intracellular  
520 compartments of tissue cells is an important component of the scaling mechanism of the fins.  
521 Our observation that *Kcnk5b* cell-autonomously activates the *7XTCF-Xla.sam:mCherry*  
522 reporter (Fig. 3) indicates that it is not due to intracellular transfer of  $K^+$ . It is still unclear  
523 whether the disruption of intracellular trafficking of other ions (such as  $Na^+$  or  $Ca^{2+}$ ) or of other  
524 factors is responsible for the connexin43's effect on scaling.

525 *Kcnk5b*'s ability to activate the *Lef1*-dependent reporter cell autonomously in different  
526 tissue types supports the conclusion that  $K^+$  conductance has the potential to regulate  
527 developmental transcription in a broad range of tissues (Fig. 3B-E). The observation that  
528 neuronal cells in the brain and myocytes in the trunk muscle respond similarly to non-excitable  
529 cells elsewhere in the body suggests that even cells that harbor action potentials use  $K^+$   
530 conductance to regulate gene expression. However, when we either stably expressed or transient  
531 transfected *Kcnk5b* in different cell lines, we did not observe consistent activation of *Lef1* or  
532 *Shh* (Fig. 4). We posit that the competencies of the cultured cell lines are different from the  
533 developmental competencies of the *in vivo* cells. Also, the mammalian cell lines are cancer cells,  
534 so they may already have an increased transcriptional base line for the selected developmental  
535 genes that the two-pore potassium-leak channels can only partially affect.

536 While we observed similarities between *Kcnk5b* and *Kcnk9* or *Kcnk10* in HEK cells, in  
537 HeLa and N2A cells, we observed only partially similar profiles for the selected genes (while  
538 *Kcnk9* and *Kcnk10* were similar) (Fig. 4). We postulate that the observed differences may come  
539 from one or both of the following explanations. First, different responses from channels of the

540 same ion-type are due to different levels of membrane potential changes, which results in  
541 different levels of gene transcription. Second, these channels have different intracellular  
542 sequences, which may determine other unknown intermolecular interactions that have different  
543 signal transduction properties. In any case, we did observe that transgenic overexpression of  
544 Kcnk9 produces a similar allometric growth of the caudal fin (Fig. 6K,L). It remains to be  
545 explored whether intermolecular interactions between the channels and another protein  
546 contribute to the scaling of other organs as well as how other electrophysiological mechanisms  
547 that control membrane potential have the same growth effect.

548 In conclusion, we show how a specific electrophysiological mechanism activates  
549 important morphogen pathways to scale tissues in different *in vivo* contexts. We propose the  
550 observed diversity in morphogen and growth factor expression to Kcnk5b activity explains why  
551 the increased activity of Kcnk5b produces the diverse transcriptional response in the different  
552 tissues associated with the observed coordinated outgrowth of the entire fin. Also, we show  
553 how changes in phosphorylation of S345 in the cytoplasmic C-terminus can be regulated by  
554 calcineurin to directly control electrophysiological activity of the channel to scale the fin. Thus,  
555 we offer an *in vivo* paradigm in which membrane potential acts as potent regulator of  
556 coordinated developmental signaling, and we show how the two-pore K<sup>+</sup>-leak channel Kcnk5b  
557 is involved in the initial activation of specific developmental mechanisms that lead to the  
558 scaling of the fish fin appendages.

559

## 560 **Acknowledgements:**

561 This work was supported by funding from ShanghaiTech University, and from the  
562 Deutsche Forschungsgemeinschaft Grant AN 797/4-1 (CLA). We thank the Microscope  
563 Facility of the School of Life Sciences and Technology at Shanghaitech University for their  
564 expertise and support. We also wish to thank C. Bökel for scientific discussions.

565

## 566 **Competing Interests**

567 The authors declare that there are no competing interests.

568

569

## 570 **Figures**

### 571 **Figure 1: Kcnk5b induces a partial developmental gene response in uninjured adult fins.**

572 (A) qRT-PCR results of *shh* and *lefl*, *aldh1 $\alpha$ 2*, *pea3* and *msxb* expression from caudal fins of  
573 6-month-old wild-type (AB) and Tg[*hsp70:kcnk5b*-GFP] zebrafish 6 hours after heat shock  
574 (HS) of the caudal fins. (B) qRT-PCR results of *shh* and *lefl*, *aldh1 $\alpha$ 2*, *pea3* and *msxb* expression  
575 from caudal fins of 6-month-old wild-type (AB) and Tg[*hsp70:kcnk5b*-GFP] zebrafish 12-hours  
576 after heat-shock induction of the the caudal fins. (C) qRT-PCR results for GFP from the  
577 transgenic fish line Tg[*hsp70:kcnk5b*-GFP] at the indicated time points relative to the single  
578 heat-shock pulse of AB wild-type and transgenic fish. AB HS for each time point were always  
579 set at 1-fold, so they are represented as only one group in the graph. (D) qRT-PCR results for  
580 several genes in the caudal fin from daily heat-shock pulse of AB wild-type and  
581 Tg[*hsp70:kcnk5b*-GFP] over 3 days. (E) *in situ* hybridization experiments on fins show  
582 expression of *shh* (a,b) and *lefl* (c,d) in heat-shocked non-transgenic control fish (a,c) and heat-  
583 shocked Tg[*hsp70:kcnk5b*-GFP](b,d). (F) Cross sections through fin rays show expression of  
584 *lefl*(a,b) and *shh* (c,d) before (a,c) and after (b,d) heat-shock induction of Tg[*hsp70:kcnk5b*-  
585 GFP]. (G) Representative images of Western blots show expression of Shh, Lefl and  $\beta$ -catenin  
586 before and 3 days after 10-minute daily heat-shock induction of *kcnk5b*-GFP in the fin. (H)  
587 Graphed measurements results of Western blots. (I) Confocal planes (0.45  $\mu$ m) of  
588 immunohistochemistry stained 10  $\mu$ m sections of control (no heat shock) or transgene-induced  
589 (heat shock) uninjured fins for merged GFP from Tg[*hsp70:kcnk5b*-GFP] and  $\beta$ -catenin (red)  
590 (a-d: Merged), GFP from Tg[*hsp70:kcnk5b*-GFP] (e,f: green)  $\beta$ -catenin (g,h: red) and DAPI  
591 (i,j: blue) of fin cross sections of transgenic Tg[*hsp70:kcnk5b*-GFP] animals without heat shock  
592 (a,c,e,g,i) or after heat shock (b,d,f,h,j). White boxes in a and b show location of magnified  
593 panels of c,e,g and d,f,j, respectively. Overlapping DAPI and  $\beta$ -catenin staining indicated by  
594 white arrows. Epi.” refers to the outer multilayered epidermis, “Be.” as the underlying basal  
595 epithelial layer, and “Mesen.” refers to the underlying mesenchymal tissues. (J) Graphed  
596 measurements of DAPI stained nuclei containing staining of  $\beta$ -catenin. (K) qRT-PCR results  
597 for the indicated genes in the caudal fin from AB non-transgenic and Tg[*hsp70:kcnk5b*-GFP]  
598 fish after daily heat-shock pulses over 3 days. Scale bars are 50  $\mu$ m (D), 1 mm (E), 10  $\mu$ m (H).  
599 The data for each experiment represent 3 or more separate experiments. The data points show  
600 all technical replicates. Student’s T-test used for the tests of significance between indicated  
601 experimental groups.

602

603 **Figure 2: *Kcnk5b* induces *shh* and *lef1* in zebrafish larva.**

604 **(Aa,b)** Comparison of gene expression from mRNA isolated from complete 3 dpf zebrafish  
605 larva harboring Tg[*hsp70:kcnk5b*-GFP] 6 hours after heat-shock (HS) induction. **(B)** *in situ*  
606 hybridization experiments on 2 dpf embryos for *shh* start to detect expression in the cells of the  
607 zone of polarity in the early pectoral fin bud by 60 minutes of incubation of the final staining  
608 reaction **(a-d)** or after overnight staining **(e-h)**. Measurements of *shh* expression levels by  
609 computer-program-based detection of pixel level intensities **(i)** or by the stained area **(j)** in the  
610 early pectoral fin bud. Panels c,d,g,h are enlarged regions (open black boxes) in panels a,b,e,f.  
611 Arrows indicate *shh* expression in the developing fin buds. **(C)** Double transgenic 3dpf larva  
612 harboring Tg[*hsp70:kcn5b*-GFP] and hemizygous Tg[*7XTCF-Xla.sam*:mCherry] either before  
613 heat shock **(a-c)** or 12 hours after heat shock **(d-f)**. **(Cg)** Measurements of mCherry intensity  
614 levels of non-transgenic (non-tg), *kcnk5b*-transgenic (*kcnk5b*) fish and transgenic fish harboring  
615 the Lef-1-dependent Tg[*7XTCF-Xla.sam*:mCherry] reporter (7xTCF) before and 12 hours after  
616 heat shock. **(D)** Cross sections through the trunks of non-transgenic **(a-d)** and Tg[*7XTCF-*  
617 *Xla.sam*:mCherry] **(e-h)** and Tg[*hsp70:kcn5b*-GFP]; Tg[*7XTCF-Xla.sam*:mCherry] double-  
618 transgenic **(i-l)** fish lines after heat shock. **(D)** Measurements from dorsal to ventral of the caudal  
619 finfold of Tg[*7XTCF-Xla.sam*:mCherry] and Tg[*7XTCF-Xla.sam*:mCherry] X  
620 Tg[*hsp70:kcnk5b*-GFP] sibling larva after heat shock. **(E)** Diagram of the measurement axes  
621 of the larva. **(F)** Length measurements from anterior-most point of the caudal finfold to its  
622 distal-most tip of 5 dpf larva. **(G)** Length measurements of the caudal finfold from the dorsal-  
623 most point to the ventral-most tip of 5 dpf larva. **(H)** Finfold anterioposterior length-to-body  
624 ratios of the caudal finfold of 5 dpf larva. **(I)** Finfold dorsoventral length-to-body ratios of the  
625 body ratios. **(J)** Body length measurements of 5 dpf larva as diagramed in (E). Scale bars are  
626 100µm **(B,C)** and 20µm **(D)**. The data for each panel represent 3 or more experiments. The data  
627 points show all technical replicates. Student's T-test used for all test of significance between  
628 the indicated experimental groups.

629 **Figure 3: Kcnk5b induces Lef-1-dependent transcription in several tissues in a cell**  
630 **autonomous manner.**

631 (A) Diagram of transplantation procedure and possible cell-autonomous and non-cell-  
632 autonomous outcomes on the expression of the Tg[7XTCF-*Xla.sam:mCherry*] Lef1 reporter  
633 after heat-shock induction of the Tg[*hsp70:kcnk5b*-GFP] transgene. (B) Transplantation  
634 experiments of donor cells from double transgenic fish harboring Tg[*hsp70:kcnk5b*-GFP] and  
635 Tg[7XTCF-*Xla.sam:mCherry*] into homozygous host embryos harboring only the Tg[7XTCF-  
636 *Xla.sam:mCherry*]. The head (a) eye (e) trunk (i) and finfold (m) of mosaic larva before heat  
637 shock induction of *kcnk5b*-GFP expression. Head (b-d), eye (f-h), trunk (j-l) and finfold (n-p)  
638 of 72 dpf larva at 24 hours after heat shock. (C) Bright field images of the head (a,d), jaw area  
639 (g) border tissue of otic vesicle (j) and trunk (o,r) of 72 hpf larva; GFP expression from  
640 Tg[*hsp70:kcnk5b*-GFP](b,e,h,k,p,s) and mCherry expression from Tg[7XTCF-  
641 *Xla.sam:mCherry*](c,f,i,l,q,t). (D) Higher magnification of merged (a) and separate GFP (b)  
642 and mCherry (c) channels of cells in the neural tube of 48 hpf embryos. Z-stack composite  
643 three-dimensional images before rotation (d), rotated 90° (e) and 180° (f). (E) Total number of  
644 positive cells counted in the tissues of all mosaic larva for all mCherry-positive cells from  
645 recipient Tg[7XTCF-*Xla.sam:mCherry*] larva, all GFP-positive cells from Tg[*hsp70:kcnk5b*-  
646 GFP](open green triangle) and all double positive cells (open blue squares). The data for each  
647 experiment represent 3 or more experiments with 2 or more biological replicates. Scale bars are  
648 equal to 200 μm (Ba-l), 50 μm (Bm-p), 20 μm (C) and 25 μm (D).

649

650 **Figure 4: Kcnk5b channel activity regulates developmental gene transcription in**  
651 **mammalian cells.**

652 (A) FRET-FLIM images after measuring the life time of CFP of the K<sup>+</sup> FRET reporter KIRIN  
653 (Shen et al., 2019). The color images indicate the differences in CFP fluorescence lifetime of  
654 the K<sup>+</sup> FRET reporter KIRIN in HEK293T (HEK) cells. Assigned rainbow of colors in the  
655 delineated cytoplasm depict the range of numeric values of nanoseconds (ns) of the detected  
656 fluorescent lifetime for CFP. Red represents longer lifetime values. Blue represents shorter  
657 lifetime values, and the other colors represent intermediary lifetime values. (a) Composite  
658 image of all lifetime values of the KIRIN K<sup>+</sup> reporter in control cells transfected with mCherry.  
659 (b) Image of low lifetime values in a control cell. (c) Image of high lifetime values in a control  
660 cell. (d) Composite image of all lifetime values of the KIRIN K<sup>+</sup> reporter in cells expressing  
661 *kcnk5b*-mCherry. (e) Image of low lifetime values in cells expressing *kcnk5b*-mCherry. (f)  
662 Image of high lifetime values in cells expressing *kcnk5b*-mCherry. (g) Compared to GFP-  
663 transfected HEK cells, cells transfected with *kcnk5b*-mCherry show an increase in CFP lifetime  
664 due to reduction in intracellular K<sup>+</sup>. (Ba) qRT-PCR for SHH and LEF1 in HEK cells. (Bb) qRT-  
665 PCR for ALDH1a2, PEA3 and MSX1 in HEK cells. (C) qRT-PCR for indicated genes in HEK  
666 cells expressing GFP, *kcnk9*-GFP or *kcnk10*-GFP 24 hours after transfection. (D) qRT-PCR  
667 results in HeLa cells expressing either GFP or *kcnk5b*-GFP 24 hours after transfection. (E,F)  
668 qRT-PCR results in N2A cells expressing either GFP or *kcnk5b*-GFP 24 hours after transfection.  
669 (G) qRT-PCR results in Mcf7 cells expressing either GFP or *kcnk5b*-GFP 24 hours after  
670 transfection. (H,I) qRT-PCR measurement of indicated gene after 24 hour transfection of  
671 Kcnk9 in Hela cells. (J) qRT-PCR measurement of indicated gene after 24 hour transfection of  
672 Kcnk10 in Hela cells. (K) qRT-PCR measurement of indicated gene after 24 hour transfection  
673 of Kcnk9 in N2A cells. (L) qRT-PCR measurement of indicated gene after 24 hour transfection  
674 of Kcnk10 in N2A cells. The data represent 3 or more experiments, The data points show all  
675 technical replicates. Student's T-test was used for tests of significance and the levels of  
676 significance are indicated between the experimental groups.

677

678 **Figure 5: Calcineurin functionally interacts and regulates channel activity of Kcnk5b. (A)**  
679 Diagram of hypothetical interaction between Calcineurin (CaN) and Kcnk5b at a consensus  
680 calcineurin binding site (LVIP) in Kcnk5b. **(B)** Whole-cell patch clamp of HEK293T (HEK)  
681 cells expressing the indicated zebrafish proteins: Calcineurin-mCherry and Kcnk5b-GFP. **(C)**  
682 Whole-cell patch-clamp results of cells expressing zebrafish Kcnk5b-GFP and treated either  
683 with DMSO or the calcineurin inhibitor FK506. **(D)** Diagram shows mutant Kcnk5b with  
684 altered amino acids at putative calcineurin binding site and graph of the Patch-clamp results of  
685 the wild-type zebrafish Kcnk5b channel (Kcnk5bLVIP) or mutant Kcnk5b (Kcnk5bmutVATA)  
686 lacking the putative calcineurin binding site. Each construct is expressed either with or without  
687 calcineurin (CaN). **(E)** qRT-PCR for SHH in HEK cell lines stably expressing either GFP or  
688 Kcnk5b-GFP and transfection with calcineurin-mCherry (CaN). **(F)** qRT-PCR for PEA3 in  
689 HEK cell lines stably expressing either GFP or Kcnk5b-GFP and transfection with calcineurin-  
690 mCherry (CaN). **(G)** qRT-PCR of SHH expression HEK cells after transfection either with GFP,  
691 *kcnk9*-GFP or *kcnk10*-GFP with or without calcineurin (CaN). **(H)** qRT-PCR of PEA3  
692 expression HEK cells after transfection either with GFP, *kcnk9*-GFP or *kcnk10*-GFP with or  
693 without calcineurin (CaN). The electrophysiology measurements **(B-D)** are averages with SEM.  
694 **(E-G)** Graph panels show averages. The data represent 3 or more experiments. The averaged  
695 data points graphed in D-B have 2 or more technical replicates per experiment. The data points  
696 graphed in E-H show all technical replicates. Student's T test was used to determine the  
697 indicated significance (P) values.

698

699 **Figure 6: Regulation of Kcnk5b controls scaling of the fin.**

700 (A) Diagram of Kcnk5b channel showing proposed Serine345Proline346 calcineurin  
701 dephosphorylation site adjacent the calcineurin-interaction site (LVIP). Mutation of S345 to  
702 alanine (A) mimics dephosphorylation. (B) Whole-cell patch-clamp results of HEK239T (HEK)  
703 cells transfected with zebrafish wild-type channel (Kcnk5bS345) or the dephospho-mimic  
704 mutant (KcnkS345A) either with or without calcineurin (CaN). (C) Diagram of serine (S) to  
705 glutamic acid (E) substitution to mimic phosphorylation of Kcnk5b. (D) Whole-cell patch-  
706 clamp measurements for wild-type Kcnk5b and mutant Kcnk5b harboring a Serine345 to  
707 glutamic acid either with or without calcineurin (CaN). (E) Graph displays different growth  
708 rates of the regenerating caudal fin lobes of the indicated transgenic fish lines. Body length of  
709 each fish was used to standardize the fin length measurements (fin-to-body ratio). (F) Caudal  
710 fin of Tg[*hsp70:kcnkbS345A*] transgenic fish after regeneration of ventral lobe. (G) Caudal fin  
711 of Tg[*hsp70:kcnk5bS345*] transgenic fish after regeneration of ventral lobe. (H) Caudal fin of  
712 Tg[*hsp70:kcnk5bS345E*] transgenic fish after regeneration of ventral lobe. (I) Graph of fin-to-  
713 body ratios of the unamputated lobes of the indicated transgenic fish lines at 33 days of the  
714 same fish as in (F). (J) Representative caudal fins of the Tg[*hsp70:kcnk9-GFP*] fish that was  
715 allowed to regenerate without any heat-shock induction of the transgene (a) or underwent a  
716 daily 10 min heat-shock induction of the Tg[*hsp70:kcnk9-GFP*] transgene (b). (K) Assessment  
717 of regenerative fin growth at 33 dpa of the indicated fish lines and heat-shock treatment. The  
718 data for each experiment represent 3 or more experiments. The averaged data points in B,D,E  
719 represent 2 or more technical replicates per experiment. The graphed data in I,K show all  
720 technical replicates. The electrophysiology measurements (panels B,D) are represented as  
721 averages with SEM. Significance values shown in the graphs were measured by students t-tests  
722 (E, I, K) are represented as averages and SD. The scale bars equal 2 mm (F-H,Ja,b). Arrows  
723 and dashed lines in F-H,Ja,b indicate amputation planes through fins.

724



725 **Figure 7: Model of calcineurin regulation of Kcnk5b-mediated activation of**  
726 **developmental gene transcription.** Kcnk5b activation results in reduced cytoplasmic K<sup>+</sup>,  
727 which is sufficient to induce the transcription of the *shh* ligand and *lefl* transcription factor as  
728 well as components of other developmental pathways to induce coordinated allometric growth  
729 of the tissues of the fish fin appendage. Scaling information from the body or local tissues in  
730 the fin activate calcineurin so that it dephosphorylates Kcnk5b on S345 to reduce its K<sup>+</sup>-channel  
731 activity, which results in isometric growth of the fin.

732

### 733 **Supplementary Figure Legends:**

734 **Figure 1-Supplementary Figure 1: Induction of developmental genes after induction of**  
735 ***kcnk5b* expression.**

736 (A) (A) qRT-PCR results of *shh* and *lefl* expression from caudal fins of 6-month-old zebrafish  
737 comparing before (-HS) and 6 hours after (+HS) heat shock induction of the Tg[*hsp70:kcnk5b*-  
738 GFP] transgene in the caudal fins. (B) Confocal image of immunohistochemistry staining for  
739 GFP expression in a cross section of the distal tip of the adult fin after heat shock induction of  
740 *kcnk5b*-GFP in a fish harboring the Tg[*hsp70:kcnk5b*-GFP] transgene. The lower left inset is  
741 an enlarged view of the expression of the transgene in the fin. (C) Confocal image of DAPI-  
742 stained nuclei of the same confocal section in panel A. (D) Overlay of the confocal GFP and  
743 DAPI images. (E) qRT-PCR results for the indicated genes in the caudal fin from AB non-  
744 transgenic and Tg[*hsp70:kcnk5b*-GFP] fish after daily heat-shock pulses over 3 days. (F) qRT-  
745 PCR for GFP expression in AB wild-type strain fish and *kcnk5b*-GFP fish after daily heat-  
746 shock pulses over 3 days. (G) The data for each panel represents 3 or more experiments. The  
747 graphed data points show all technical replicates.

748

749 **Figure 1-Supplementary Figure 2: Protein expression of selected developmental genes and**  
750 **β-catenin subcellular distribution.**

751 (A) Example blot for Shh expression in adult fins with or without heat-shock induction of the  
752 Tg[*hsp70:kcnk5b*-GFP] transgene. (B) Example blot for Lefl expression in adult fins with or  
753 without heat-shock induction of the Tg[*hsp70:kcnk5b*-GFP] transgene. (C) Example blot for β-  
754 catenin expression in adult fins with or without heat-shock induction of the Tg[*hsp70:kcnk5b*-  
755 GFP] transgene. (D) Example blot for β-actin expression in adult fins with or without heat-

756 shock induction of the Tg[*hsp70:kcnk5b*-GFP] transgene. **(E-G)** Three adjacent serial confocal  
757 sections through the fin of a control non-heat-shocked Tg[*hsp70:kcnk5b*-GFP] fish. Dapi stains  
758 the nuclei (blue) and immunohistochemistry for  $\beta$ -catenin (red). **(a)** Lower magnifications. **(b)**  
759 Corresponding higher magnifications for each preceding (a) panel. **(H-J)** Three adjacent serial  
760 confocal sections through the fin of a heat-shocked Tg[*hsp70:kcnk5b*-GFP] fish. Dapi stains the  
761 nuclei (blue) and immunohistochemistry for  $\beta$ -catenin (red). **(a)** Lower magnifications. **(b)**  
762 Corresponding higher magnifications for each preceding (a) panel. **(K)** Graphed measurements  
763 of  $\beta$ -catenin fluorescence intensity of stained sections. All scale bars are equal to 10  $\mu$ m. The  
764 data for each panel represent 3 or more experiments. The graphed data points show all technical  
765 replicates

766

767 **Figure 2-Supplementary Figure 1: Controls for *shh* expression and transgenic expression**  
768 **of *Kcnk5b* in embryos.** **(A)** Transgenic expression of *Kcnk5b* after single heat shock pulse  
769 induces transgene expression. **(B)** *in situ* probe for *shh* shows expected expression pattern. **(C)**  
770 Ratios of finfold and body length measurements of caudal finfold along the anterioposterior  
771 axes of 3 dpf single transgenic Tg[*7XTCF-Xla.sam*:mCherry] and double transgenic  
772 Tg[*7XTCF-Xla.sam*:mCherry] X Tg[*hsp70:kcnk5b*-GFP] after 3x once-a-day heat-shock pulse,  
773 30 min each. Each panel represents 3 or more experiments. The graphed data show all technical  
774 replicates.

775

776 **Figure 3-Supplementary Figure 1: Expression of *Kcnk5b*-GFP from Tg[*hsp70:kcnk5b*-**  
777 **GFP] after single heat shock and consequent activation of *7XTCF-Xla.sam*:mCherry.**

778 **(A)** Representative bright field cross section through the mid-section of heat-shocked transgenic  
779 zebrafish 72 hpf larva. **(B)** Immunohistochemical staining for GFP of the same cross section in  
780 panel A. **(C)** DAPI staining of the same cross section in panel A. **(D)** Representative confocal  
781 image of immunohistochemical staining for GFP in heat-shocked transgenic zebrafish larva  
782 showing membranous staining of *Kcnk5b*-GFP. **(E)** DAPI staining of the same confocal section  
783 in panel D. **(F)** Merged image of panels D and E.. **(Ga-i)** Images of cells in the head 48 hpf  
784 embryos expressing *kcnk5b*-GFP transgene and mCherry from the *7XTCF-Xla.sam*:mCherry  
785 transgene. **(a)** Bright fish image, **(b)** merge of GFP and mCherry, **(c)** enlargement of (b), **(d)**  
786 GFP image, **(e)** enlargement of (d), **(f)** mCherry image, **(g)** enlargement of (f), **(h)** 3D composite  
787 of z-stacked images, **(i)** enlargement of (h). **(Ha-i)** Images of cells in the brain of 48 hpf embryos  
788 expressing *kcnk5b*-GFP transgene and mCherry from the *7XTCF-Xla.sam*:mCherry transgene.

789 (a) Bright fish image, (b) merge of GFP and mCherry, (c) enlargement of (b), (d) GFP image,  
790 (e) enlargement of (d), (f) mCherry image, (g) enlargement of (f), (h) 3D composite of z-stacked  
791 images, (i) enlargement of (h). (Ia-i) Images of cells in the developing otic vesical of 48 hpf  
792 embryos expressing *kcnk5b*-GFP transgene and mCherry from the *7XTCF-Xla.sam:mCherry*  
793 transgene. (a) Bright fish image, (b) merge of GFP and mCherry, (c) enlargement of (b), (d)  
794 GFP image, (e) enlargement of (d), (f) mCherry image, (g) enlargement of (f), (h) 3D composite  
795 of z-stacked images, (i) enlargement of (h). (Ja-i) Images of cells in the developing neural tube  
796 of 48 hpf embryos expressing *kcnk5b*-GFP transgene and mCherry from the *7XTCF-*  
797 *Xla.sam:mCherry* transgene. (a) merge of GFP and mCherry, (b) enlargement of (a), (c) eGFP  
798 image, (d) enlargement of GFP image (c), (e) mCherry image, (f) enlargement of mCherry  
799 image (e), (g) 3D composite of z-stacked images, (h) enlargement of 3D composite (g), (i) 90°  
800 rotation of 3D composite of z-stacked images (g). Scale bars equal 40 μm (A-C), 5 μm (D-F),  
801 20 μm (G-J). The data for each panel represents 3 or more experiments.

802

803 **Figure 4-Supplementary Figure 1: Expression and activity of Kcnk5b-GFP in transfected**  
804 **HEK293T cells.**

805 (A) Confocal image of through an immunocytochemical staining of a HEK293T cell transfected  
806 with zebrafish *kcnk5b*-GFP transgene (B) DAPI staining of the same cell in panel A. (C)  
807 Merged panels A and B. (D-L) Serial confocal cross sections for GFP in a live HEK293T cell  
808 from its surface (D) through to a mid-section of the cell (L) after transfection with the zebrafish  
809 *kcnk5b*-GFP transgene. (M) FRET-FLIM image after measuring the life time of CFP of the K<sup>+</sup>  
810 FRET reporter KIRIN in a cell transfected with a control plasmid only expressing mCherry.  
811 The inset image of the confirmation of the FRET reporter depicting how FRET occurs. (N)  
812 FRET-FLIM image after measuring the life time of CFP of the K<sup>+</sup> FRET reporter KIRIN in a  
813 cell transfected with a plasmid expressing *kcnk5b*-mCherry. The inset image of the  
814 confirmation of the FRET reporter depicting how FRET do not occur. (O) The graphed  
815 assessments of the changes in CFP lifetime in the control mCherry-expressing cells and the  
816 cells expressing *kcnk5b*-mCherry. The diagrams to the right of the graph depict the  
817 conformational changes that result in the values of the lifetimes of CFP. The data for each  
818 experiment represents 3 or more experiments. The graphed data points show all technical  
819 replicates.

820

821 **Figure 4-Supplementary Figure 2: Comparison of Kcnk5b with Knck9 or with Kcnk10.**

822 (A,B) qRT-PCR measurement of the indicated gene after 24 hour transfection of Kcnk5b in  
823 HEK293T cells. (C,D) Comparison between zebrafish amino acid sequences from Kcnk5b  
824 (blue) and Kcnk9 (C, black) and Kcnk10b (D, black) show conserved (red letter) and similar  
825 properties (red plus sign) amino acids. Yellow-highlighted letters indicate calcineurin binding  
826 site, and green-highlighted letters indicate the site of post-translational modification by  
827 calcineurin. The data for each experiment represent 3 or more experiments. The graphed data  
828 points show all technical replicates.

829

830 **Figure 6-Supplementary Figure 1: Activity measurements of Kcnk5b Serine mutant**  
831 **channels**

832 (A) Diagram of Kcnk5b channel showing proposed Serine345 calcineurin dephosphorylation  
833 site (yellow) adjacent the calcineurin-interaction site (LVIP). Two other serines (blue) were  
834 substituted with alanines or glutamic acids to mimic dephosphorylation or phosphorylation.

835 (B) Electrophysiology measurements of wild-type Kcnk5b (blue) and serine-to-alanine mutant  
836 Kcnk5bS330A (purple). (C) Electrophysiology measurements of wild-type Kcnk5b (blue) and  
837 serine-to-alanine mutant Kcnk5bS332A (yellow). (D) Electrophysiology measurements of  
838 wild-type Kcnk5b (blue) and serine-to-alanine mutant Kcnk5bS345A (orange). (E)  
839 Electrophysiology measurements of wild-type Kcnk5b (blue), serine-to-glutamic acid mutant  
840 Kcnk5bS330E (black) and Kcnk5bS330E plus calcineurin (CaN) (red). (F) Electrophysiology  
841 measurements of wild-type Kcnk5b (blue), serine-to-glutamic acid mutant Kcnk5bS332E  
842 (black) and Kcnk5bS332E plus calcineurin (CaN) (red). (G) Body length measurements from  
843 tip of the head to the base of the fin for each transgenic fish are represented as averages and  
844 standard deviation. (H) Body length measurements from tip of the head to the base of the fin  
845 for each fish of either wild-type (AB) or Tg[*hsp70:kcnk9*-GFP] (*kcnk9*) either without (-HS) or  
846 with (+HS) heat shock. The data for each experiment represent 3 or more experiments. The  
847 averaged data points in B-G represent 2 or more technical replicates per experiment. The data  
848 in H show all technical replicates.

849

850

## 851 **References:**

- 852 Adams, D.S., and Levin, M. (2013). Endogenous voltage gradients as mediators of cell-cell  
853 communication: strategies for investigating bioelectrical signals during pattern formation. *Cell Tissue*  
854 *Research* 352, 95-122.
- 855 Andersen, E.D., Krasilnikoff, P.A., and Overvad, H. (1971). Intermittent muscular weakness,  
856 extrasystoles, and multiple developmental anomalies. A new syndrome? *Acta Paediatr Scand* 60, 559-  
857 564.
- 858 Baer, M.L., and Colello, R.J. (2016). Endogenous bioelectric fields: a putative regulator of wound  
859 repair and regeneration in the central nervous system. *Neural Regeneration Research* 11, 861-864.
- 860 Balciunas, D., Wangenstein, K.J., Wilber, A., Bell, J., Geurts, A., Sivasubbu, S., Wang, X., Hackett,  
861 P.B., Largaespada, D.A., McIvor, R.S., *et al.* (2006). Harnessing a high cargo-capacity transposon for  
862 genetic applications in vertebrates. *PLoS Genetics* 2, e169.
- 863 Bartel, D.P., Sheng, M., Lau, L.F., and Greenberg, M.E. (1989). Growth factors and membrane  
864 depolarization activate distinct programs of early response gene expression: dissociation of fos and jun  
865 induction. *Genes & Development* 3, 304-313.
- 866 Blackiston, D.J., McLaughlin, K.A., and Levin, M. (2009). Bioelectric controls of cell proliferation:  
867 Ion channels, membrane voltage and the cell cycle. *Cell Cycle* 8, 3527-3536.
- 868 Borgens, R.B., J. W. Vanable, J., and Jaffe, L.F. (1977). Bioelectricity and Regeneration. I Initiation of  
869 Frog Limb Regeneration by Minute Currents. *Journal of Experimental Zoology* 200, 403-416.
- 870 Borges, R.B., Joseph W. Vanable, J., and Jaffe, L.F. (1979). Reduction of Sodium Dependent Stump  
871 Currents Disturbs Urodele Limb Regeneration. *Journal of Experimental Zoology* 208, 377-386.
- 872 Brand, M., Granato, M., and Nüsslein-Volhard, C. (2002). Keeping and raising zebrafish. In *Zebrafish:*  
873 *a Practical Approach*, C. Nüsslein-Volhard, and R. Dahm, eds. (Oxford University Press), pp. 7-38.
- 874 Camargo, F.D., Gokhale, S., Johnnidis, J.B., Fu, D., Bell, G.W., and al., e. (2007). YAP1 increases  
875 organ size and expands undifferentiated progenitor cells. *Current Biology* 17, 2054-2060.
- 876 Canun, S., Perez, N., and Beirana, L.G. (1999). Andersen syndrome autosomal dominant in three  
877 generations. *Am J Med Genet* 85, 147-156.
- 878 Cao, Z., Meng, Y., Gong, F., Xu, Z., Liua, F., Fang, M., Zou, L., Liao, X., Wang, X., Luo, L., *et al.*  
879 (2021). Calcineurin controls proximodistal blastema polarity in zebrafish fin regeneration. *PNAS* 118,  
880 e2009539118.
- 881 Chow, R.L., Altmann, C.R., Lang, R.A., and Hemmati-Brivanlou, A. (1999). Pax6 induces ectopic  
882 eyes in a vertebrate. *Development* 126, 4213-4222.
- 883 Daane, J.M., Lanni, J., Rothenberg, I., Seebohm, G., Higdon, C.W., Johnson, S.L., and Harris, M.P.  
884 (2018). Bioelectric-calcineurin signaling module regulates allometric growth and size of the zebrafish  
885 fin. *Scientific Reports* 8, 10391.
- 886 Dahal, G.R., Rawson, J., Gassaway, B., Kwok, B., Tong, Y., Ptacek, L.J., and Bates, E. (2012). An  
887 inwardly rectifying K<sup>+</sup> channel is required for patterning. *Development* 139, 3653-3664.
- 888 Dong, J., Feldmann, G., Huang, J., Wu, S., Zhang, N., Comerford, S.A., Gayyed, M.F., Anders, R.A.,  
889 Maitra, A., and Pan, D. (2007). Elucidation of a universal size-control mechanism in *Drosophila* and  
890 mammals. *Cell* 130, 1120-1133.
- 891 Durant, F., Bischof, J., Fields, C., Morokuma, J., LaPalme, J., Hoi, A., and Levin, M. (2019). The role  
892 of early bioelectric signals in the regeneration of planarian anterior/posterior polarity. *Biophysical*  
893 *Journal* 116, 948-961.
- 894 Emmons-Bell, M., and Hariharan, I.K. (2021). Membrane potential regulates hedgehog signaling in  
895 the *Drosophila* wing imaginal disc. *EMBO Reports* e51861.

- 896 Flores, C., Cid, L., Niemeyer, M., and Sepulveda, F. (2011). B Lymphocytes taken to task: a role for a  
897 background conductance K2p K<sup>+</sup> channel in B cells. Focus on "Expression of TASK-2 and its up-  
898 regulation by B cell receptor stimulation in WEJI-231 mouse immature B cells". *American Journal of*  
899 *Physiology Cell Physiology* 300, C976-C978.
- 900 Geremia, N.M., Gordon, T., Burshart, T.M., Abdulhakeem A. Al, M., and Verge, V.M.K. (2007).  
901 Electrical Stimulation Promotes Sensory Neuron Regeneration and Growth-associated Gene  
902 Expression. *Experimental Neurobiology* 205, 327-359.
- 903 Göb, E., Bittner, S., Bobak, N., Kraft, P., Göbel, K., Langhauser, F., Homola, G.A., Brede, M., Budde,  
904 T., Meuth, S.G., *et al.* (2015). The two-pore domain potassium channel KCNK5b deteriorates the  
905 outcome in ischemic neurodegeneration. *Pflüger Archive-European Journal of Physiology* 467, 973-  
906 987.
- 907 Goldstein, S.A.N., Bockenbauer, D., O'Kelly, I., and Zilberberg, N. (2001). Potassium leak channels  
908 and the KCNK family of two-P-domain subunits. *Nature Reviews Neuroscience* 2, 176-184.
- 909 Grigoriu, S., Bond, R., Cossio, P., Chen, J.A., Ly, N., Hummer, G., Page, R., Cyert, M.S., and Peti, W.  
910 (2013). The molecular mechanisms of substrate engagement and immunosuppressant inhibition of  
911 calcineurin. *Plos Biology* 11, e1001492.
- 912 Halder, G., Callaerts, P., and Gehring, W.J. (1995). Induction of ectopic eyes by targeted expression of  
913 the eyeless gene in *Drosophila*. *Science* 267, 1788-1792.
- 914 Han, Y., Chen, A., Umansky, K.-B., Oonk, K.A., Choi, W.-Y., Dickson, A.L., Ou, J., Cigiola, V.,  
915 Yifa, O., Cao, J., *et al.* (2019). Vitamin D stimulates cardiomyocyte proliferation and controls organ  
916 size and regeneration in zebrafish. *Developmental Cell* 48, 853-863.
- 917 Hoptak-Solga, A.D., Klein, K.A., DeRosa, A.M., White, T.W., and Iovine, M.K.-. (2007). Zebrafish  
918 short fin mutations in connexin4 lead to aberrant gap junctional intercellular communication. *FEBS*  
919 *letters* 581, 3297-3302.
- 920 Iovine, M.K., Higgins, E.P., Hindes, A., Coblitz, B., and Johnson, S.L. (2005). Mutations in  
921 *connexin43 (GJA1)* perturb bone growth in zebrafish fins. *Developmental Biology* 278, 208-219.
- 922 Jenkins, L.S., Duerstock, B.S., and Borges, R.B. (1996). Reduction of the Current of Injury Leaving  
923 the Amputation Inhibits Limb Regeneration in the Red Spotted Newt. *Developmental Biology* 178,  
924 251-262.
- 925 Kawakami, Y., Rodriguez Esteban, C., Raya, M., Kawakami, H., Marti, M., Dubova, I., and Izpisua  
926 Belmonte, J.C. (2006). Wnt/beta-catenin signaling regulates vertebrate limb regeneration. *Genes &*  
927 *Development* 20, 3232-3237.
- 928 Kujawski, S., Lin, W., Kitte, F., Börmel, M., Fuchs, S., Arulmozhivarman, G., Vogt, S., Theil, D.,  
929 Zhang, Y., and Antos, C.L. (2014). Calcineurin regulates coordinated outgrowth of zebrafish  
930 regenerating fins *Developmental Cell* 28, 1-15.
- 931 Lanni, J.S., Peal, D., Ekstrom, L., Chen, H., Stanclift, C., Bowen, M.E., Mercado, A., Gamba, G.,  
932 Kahle, K.T., and Harris, M.P. (2019). Integrated K<sup>+</sup> channel and K<sup>+</sup>Cl<sup>-</sup> cotransporter function are  
933 required for the coordination of size and proportion during development. *Dev Biol* 456, 164-178.
- 934 Levin, M. (2014). Molecular bioelectricity: how endogenous voltage potentials control cell behavior  
935 and instruct pattern regulation in vivo. *Molecular Biology of the Cell* 25, 3835-3850.
- 936 Marcoux, A.A., Garneau, A.P., Frenette-Cotton, R., Slimani, S., Mac-Way, F., and Isenring, P. (2017).  
937 Molecular features and physiological roles of K<sup>+</sup>-Cl<sup>-</sup> cotransporter 4. *BBA-General Subjects* 1861,  
938 3154-3166.
- 939 McCaig, C.D., Rajnicek, A.M., Song, B., and Zhao, M. (2005). Controlling Cell Behavior Electrically:  
940 Current Views and Future Potential. *Physiol Rev* 85, 943-978.
- 941 McGinnis, M.E., and Jr., J.W.V. (1986). Electrical Fields in *Notophthalmus viridescens* Limb Stumps.  
942 *Developmental Biology* 116, 184-193.

- 943 McLaughlin, K.A., and Levin, M. (2018). Bioelectric signaling in regeneration: Mechanisms of ionic  
944 controls of growth and form. *Developmental Biology* 433, 177-189.
- 945 Messerli, M.A., and Graham, D.A. (2011). Extracellular electrical fields direct wound healing and  
946 regeneration. *The Biological Bulletin* 221, 72-92.
- 947 Moro, E., Ozhan-Kizil, G., Mongera, A., Beis, D., Wierzbicki, C., Young, R.M., Bournele, D.,  
948 Domenichini, A., Valdivia, L.E., Lum, L., *et al.* (2012). In vivo Wnt signaling tracing through a  
949 transgenic biosensor fish reveals novel activity domains. *Developmental Biology* 366, 327-340.
- 950 Morokuma, J., Blackiston, D., Adams, D.S., Seebohm, G., Trimmer, B., and Levin, M. (2008).  
951 Modulation of potassium channel functions confers a hyperproliferative invasive phenotype on  
952 embryonic stem cells. *Proceeding of the National Academy of Sciences USA* 105, 16608-16613.
- 953 Nam, J., Shin, D., Zheng, H., Lee, D., Park, S., Park, K., and Kim, S. (2011). Expression of TASK-2  
954 and its upregulation by B cell receptor stimulation in WEHI-231 mouse immature B cells. *American*  
955 *Journal of Physiology Cell Physiology* 300, C1013-1022.
- 956 Niemeyer, M., Cid, L., Pena-Münzenmayer, G., and Sepulveda, F. (2010). Modulation of the two-pore  
957 domain acid-sensitive K<sup>+</sup> channel TASK-2 (KCNK5) by changes in cell volume. *Journal of Biological*  
958 *Chemistry* 276, 43166-43174.
- 959 Pai, V.P., Aw, S., Shomrat, T., Lemire, J.M., and Levin, M. (2012). Transmembrane voltage potential  
960 controls embryonic eye patterning in *Xenopus laevis*. *Development* 139, 313-323.
- 961 Pai, V.P., Lemire, J.M., Chen, Y., Lin, G., and Levin, M. (2015). Local and long-range endogenous  
962 resting potential gradients antagonistically regulate apoptosis and proliferation in the embryonic CNS.  
963 *International Journal of Developmental Biology* 59, 327-340.
- 964 Perathoner, S., Daane, J.M., Henrion, U., Seebohm, G., Higdon, C.W., Johnson, S.L., Nüsslein-  
965 Volhard, C., and Harris, M.P. (2014). Bioelectric signaling regulates size in zebrafish fins. *PLoS*  
966 *Genetics* 10, e1004080.
- 967 Poon, C.L.C., Mitchell, K.A., Kondo, S., Cheng, L.Y., and Harvey, K.F. (2016). The hippo pathway  
968 regulates neuroblasts and brain size in *Drosophila melanogaster*. *Current Biology* 26, 1034-1042.
- 969 Rogulja, D., Rauskolb, C., and Irvine, K.D. (2008). Morphogen control of Wing Growth through the fat  
970 signaling pathway. *Developmental Cell* 15, 309-321.
- 971 Sansone, V., Griggs, R.C., Meola, G., Ptacek, L.J., Barohn, R., Iannaccone, S., Bryan, W., Baker, N.,  
972 Janas, S.J., Scott, W., *et al.* (1997). Andersen's syndrome: a distinct periodic paralysis. *Ann Neurol* 42,  
973 305-312.
- 974 Shattock, M.J., Ottolia, M., Bers, D.M., Blaustein, M.P., Boguslavskyi, A., Bossuyt, J., Bridge, J.H.B.,  
975 Chen-Izu, Y., Clancy, C.E., Edwards, A., *et al.* (2015). Na<sup>+</sup>/Ca<sup>2+</sup> exchange and Na<sup>+</sup>/K<sup>+</sup>-ATPase in  
976 the heart. *Journal of Physiology* 593.6, 1361-1382.
- 977 Shen, Y., Wu, S.-Y., Rancic, V., Aggarwal, A., Qian, Y., Miyashita, S.-I., Ballanyi, K., Campbell,  
978 R.E., and Dong, M. (2019). Genetically encoded fluorescent indicators for imaging intracellular  
979 potassium ion concentration. *Communications Biology* 2.
- 980 Stewart, S., Bleu, H.K.L., Yette, G.A., Henner, A.L., Braunstein, J.A., and Stankunas, K. (2020).  
981 longfin causes *cis*-ectopic expression of the *kcnh2a ether-a-go-go* K<sup>+</sup> channel to autonomously  
982 prolong fin outgrowth. *bioRxiv*
- 983 Stoick-Cooper, C.L., Weidinger, G., Riehle, K.J., Hubbert, C., Major, M.B., Fausto, N., and Moon,  
984 R.T. (2007). Distinct Wnt signaling pathways have opposing roles in appendage regeneration.  
985 *Development* 134, 479-489.
- 986 Sundelacruz, S., Levin, M., and Kaplan, D.L. (2009). Role of Membrane Potential in the Regulation of  
987 Cell Proliferation and Differentiation. *Stem Cell Review and Reports* 5, 231-246.

- 988 Tawil, R., Ptacek, L.J., Pavlakis, S.G., DeVivo, D.C., Penn, A.S., Ozdemir, C., and Griggs, R.C.  
989 (1994). Andersen's syndrome: potassium-sensitive periodic paralysis, ventricular ectopy and  
990 dysmorphic features. *Ann Neurol* 35, 326-330.
- 991 Tornini, V.A., Puliafito, A., Slota, L.A., Thompson, J.D., Nachtrab, G., Kaushik, A.-L., Kapsimali,  
992 M., Primo, L., Talia, S.D., and Poss, K.D. (2016). Live Monitoring of Blastema Cell Contributions  
993 during Appendage Regeneration. *Current Biology* 26, 2981-2991.
- 994 Urrego, D., Tomczak, A.P., Zahed, F., Stühmer, W., and Pardo, L.A. (2014). Potassium channels in  
995 cell cycle and cell proliferation. *Philosophical Transactions of the Royal Society B* 369, 20130094.
- 996 Warth, R., Barriere, H., Meneton, P., Bloch, M., Thomas, J., Tauc, M., Heitzmann, D., Romeo, E.,  
997 Verrey, F., Mengual, R., *et al.* (2004). Proximal renal tubular acidosis in TASK2 K<sup>+</sup> channel-deficient  
998 mice reveals a mechanism for stabilizing bicarbonate transport. *Proceeding of the National Academy  
999 of Sciences USA* 101, 8215-8220.
- 1000 Yasuda, I. (1974). Mechanical and Electrical Callus. *Clinical Studies. Annals New York Academy of  
1001 Sciences*, 457-465.
- 1002 Yoon, G., Quitania, L., Kramer, J.H., Fu, Y.H., Miller, B.L., and Ptacek, L.J. (2006a). Andersen-Tawil  
1003 syndrome: definition of a neurocognitive phenotype. *Neurology* 66, 1703-1710.
- 1004 Yoon, G., Tristani-Firouzi, M., Etheridge, S.P., Quitania, L., Kramer, J.H., Miller, B.L., Fu, Y.H., and  
1005 Ptacek, L.J. (2006b). Andersen-Tawil syndrome: prospective cohort analysis and expansion of the  
1006 phenotype. *Am J Med Genet* 140A, 312-321.
- 1007 Yu, F.-X., and Guan, K.-L. (2013). The Hippo pathway: regulators and regulations. *Genes &  
1008 Development* 27, 355-371.
- 1009 Zaritsky, J.J., Eckman, D.M., Wellman, G.C., Melson, M.T., and Schwarz, T.L. (2000). Targeted  
1010 disruption of Kir2.1 and Kir2.2 genes reveals the essential role of the inwardly rectifying K<sup>(+)</sup> current  
1011 in K<sup>(+)</sup> -mediated vasodilation. *Circulation Research* 87, 160-166.
- 1012 Zhao, M., Pu, J., Forrester, J.V., and McCaig, C.D. (2002). Membrane lipids, EGF receptors, and  
1013 intracellular signals colocalize and are polarized in epithelial cells moving directionally in a  
1014 physiological electric field. *FASEB Journal* 16.
- 1015
- 1016



1017 **Material and Methods**

| <b>Key Resources Table</b>                |                    |                            |                           |                               |
|-------------------------------------------|--------------------|----------------------------|---------------------------|-------------------------------|
| <b>Reagent type (species) or resource</b> | <b>Designation</b> | <b>Source or reference</b> | <b>Identifiers</b>        | <b>Additional information</b> |
| gene (Danio rerio)                        | Kcnk5b             | genebank                   | ZFIN:ZDB-GENE-040426-1297 |                               |
| gene (Danio rerio)                        | Kcnk9              | genebank                   | ZFIN:ZDB-GENE-070705-260  |                               |
| gene (Danio rerio)                        | Kcnk10a            | genebank                   | ZFIN:ZDB-GENE-041210-291  |                               |
| gene (Homo sapiens)                       | CaN                | genebank                   | HGNC:HGNC:9314            |                               |
| gene (Danio rerio)                        | lef1               | genebank                   | ZFIN:ZDB-GENE-990714-26   |                               |
| gene (Danio rerio)                        | shha               | genebank                   | ZFIN:ZDB-GENE-980526-166  |                               |
| gene (Danio rerio)                        | aldh1a2            | genebank                   | ZFIN:ZDB-GENE-011010-3    |                               |
| gene (Danio rerio)                        | pea3               | genebank                   | ZFIN:ZDB-GENE-990415-71   |                               |
| gene (Danio rerio)                        | msxb               | genebank                   | ZFIN:ZDB-GENE-980526-312  |                               |

|                     |          |          |                          |  |
|---------------------|----------|----------|--------------------------|--|
| gene (Danio rerio)  | ptch1    | genebank | ZFIN:ZDB-GENE-980526-196 |  |
| gene (Danio rerio)  | ptch2    | genebank | ZFIN:ZDB-GENE-980526-44  |  |
| gene (Danio rerio)  | bmp2b    | genebank | ZFIN:ZDB-GENE-980526-474 |  |
| gene (Danio rerio)  | axin2    | genebank | ZFIN:ZDB-GENE-000403-2   |  |
| gene (Danio rerio)  | bactin2  | genebank | ZFIN:ZDB-GENE-000329-3   |  |
| gene (Homo sapiens) | lef1     | genebank | HGNC:HGNC:6551           |  |
| gene (Homo sapiens) | shh      | genebank | HGNC:HGNC:10848          |  |
| gene (Homo sapiens) | aldh1a12 | genebank | HGNC:HGNC:15472          |  |
| gene (Homo sapiens) | pea3     | genebank | HGNC:HGNC:3493           |  |
| gene (Homo sapiens) | msxb     | genebank | HGNC:HGNC:7391           |  |

|                                                                    |                            |                                    |                        |                                    |
|--------------------------------------------------------------------|----------------------------|------------------------------------|------------------------|------------------------------------|
| gene (Homo sapiens)                                                | GAPDH                      | genebank                           | HGNC:HGNC:4141         |                                    |
| strain, strain background (AB as background, both male and female) | Tg[hsp70:Kcnk5b-GFP]       | AB fish from CZRC                  | AB fish Catlog ID: CZ1 | Based on tol2 transposable element |
| strain, strain background (AB as background, both male and female) | Tg[hsp70:Kcnk5b S345A-GFP] | AB fish from CZRC                  | AB fish Catlog ID: CZ1 | Based on tol2 transposable element |
| strain, strain background (AB as background, both male and female) | Tg[hsp70:Kcnk5b S345E-GFP] | AB fish from CZRC                  | AB fish Catlog ID: CZ1 | Based on tol2 transposable element |
| strain, strain background (AB as background, both male and female) | Tg[hsp70:Kcnk9-GFP]        | AB fish from CZRC                  | AB fish Catlog ID: CZ1 | Based on tol2 transposable element |
| strain, strain background (AB as background, both male and female) | Tg[7XTC F-Xla.sam:mCherry] | European Zebrafish Resource Center | Cat.#:15200            |                                    |
| genetic reagent (Oryzias latipes)                                  | Transposase RNA            | This paper                         | This paper             | In vitro transcribed by sp6 kit    |
| genetic reagent                                                    | DIG RNA Labeling Mix       | Roche                              | Cat.#:1277073          |                                    |
| genetic reagent (E. coli)                                          | T7 RNA-polymerase          | Promega                            | Cat.#:P207B            |                                    |
| cell line (human)                                                  | pLenti-CMV-                | OBiO                               | Contract number:HY KY- | Titer:1.67E*08 TU/ml               |

|                               |                                    |                |                                                                                  |                                                           |
|-------------------------------|------------------------------------|----------------|----------------------------------------------------------------------------------|-----------------------------------------------------------|
|                               | Kcnk5b-EGFP                        |                | 181108018-DLV                                                                    |                                                           |
| cell line (human)             | pLenti-CMV-EGFP                    | OBiO           | Contract number:HY KY-181108018-DLV                                              | Titer:1.55E*09 TU/ml                                      |
| transfected construct (human) | CMV-Kcnk5b-GFP                     | this paper     | primers from <a href="https://www.genewiz.com.cn">https://www.genewiz.com.cn</a> | Kcnk5b is cloned from adult zebrafish fin cDNA library    |
| transfected construct (human) | CMV-Kcnk9-GFP                      | this paper     | primers from <a href="https://www.genewiz.com.cn">https://www.genewiz.com.cn</a> | Kcnk9 is cloned from zebrafish 3dpf larva cDNA library    |
| transfected construct (human) | CMV-Kcnk10-GFP                     | this paper     | primers from <a href="https://www.genewiz.com.cn">https://www.genewiz.com.cn</a> | Kcnk10 is cloned from zebrafish 3dpf larva cDNA library   |
| transfected construct (human) | CMV-CaN-Mcherry                    | this paper     | primers from <a href="https://www.genewiz.com.cn">https://www.genewiz.com.cn</a> | CaN is cloned from adult zebrafish fin cDNA library       |
| transfected construct (human) | CMV-Kirin                          | Shen           | Shen et al., 2019                                                                |                                                           |
| biological sample (zebrafish) | Adult zebrafish fin tissue         | this paper     | this paper                                                                       | Freshly isolated after heatshock at indicated time points |
| antibody                      | Anti-GFP (mouse monoclonal)        | Invitrogen     | Cat. #: MA5-15349 RRID:987186                                                    | IF(1: 400)                                                |
| antibody                      | Anti-β-catenin (rabbit polyclonal) | Cell Signaling | Cat. #: 9562L RRID :B_331149                                                     | WB(1:1000)<br>IF(1:400)                                   |
| Antibody                      | Anti-Lef1(rabbit monoclonal)       | Cell Signaling | Cat. #:2230T RRID:AB_823558                                                      | WB (1:1000)                                               |

|          |                                                               |            |                                       |             |
|----------|---------------------------------------------------------------|------------|---------------------------------------|-------------|
| antibody | Anti-Shh(rabbit polyclonal)                                   | Novus      | Cat. #: NBP2-22139                    | WB (1:1000) |
| antibody | Anti-mCherry antibody(rabbit polyclonal)                      | Invitrogen | Cat. #:PA534974<br>RRID:AB_2552323    | IF(1:1000)  |
| antibody | Anti-mouse-GFP (goat polyclonal)                              | Abcam      | Cat. #:ab150113<br>RRID:AB_2576208    | IF(1:1000)  |
| antibody | goat-anti-rabbit-mCherry secondary antibody( Goat polyclonal) | Abcam      | Cat. #:ab150078<br>RRID:AB_2722519    | IF(1:2000)  |
| antibody | Anti-Mouse IgG (goat Polyclonal)                              | Sigma      | Cat. #:A3682-1ML<br>RRID:AB_258100    | WB(1:80000) |
| antibody | Anti-Rabbit IgG (H+L) (donkey Polyclonal)                     | Jackson    | Cat. #:711-036-152<br>RRID:AB_2340590 | WB(1:20000) |
| antibody | Anti-β-Actin pAb-HRP-Direct (rabbit Polyclonal)               | MBL        | Cat. #:PM053-7<br>RRID:AB_10697035    | WB(1:2000)  |

|                         |                                                      |             |                    |                                    |
|-------------------------|------------------------------------------------------|-------------|--------------------|------------------------------------|
| antibody                | Anti-Digoxigenin-AP, Fab fragments(sheep polyclonal) | Roche       | Cat.#:11093274910  | Insitu(1:5000)                     |
| recombinant DNA reagent | NovoRe c® plus One step PCR Cloning Kit              | novoprotein | Cat.#:NR005-01B    |                                    |
| sequence-based reagent  | F-kcnk9                                              | this paper  | Pcr primers        | ATGAAGAGGCAGAACG<br>TGCGGACGC      |
| sequence-based reagent  | R-kcnk9                                              | this paper  | Pcr primers        | GATGGACTTGCCTCGT<br>CTCATAAGCCGG   |
| sequence-based reagent  | F-kcnk10                                             | this paper  | Pcr primers        | ATGAAATTTCCAACGG<br>AAAACCCGAGGAAG |
| sequence-based reagent  | R-kcnk10                                             | this paper  | Pcr primers        | CTATGGATCCACCTGC<br>AAACGGAACTC    |
| commercial assay or kit | Protein Quantitative Kit (BCA)                       | MDBio       | Cat.#:KT054-200rxn |                                    |
| chemical compound, drug | FK506                                                | Sigma       | Cat.#:F4679-5MG    |                                    |
| chemical compound, drug | DL-Dithiothreitol                                    | Promega     | Cat.#:P117B        |                                    |

|                         |                                                 |                   |                    |                                                                     |
|-------------------------|-------------------------------------------------|-------------------|--------------------|---------------------------------------------------------------------|
| chemical compound, drug | Adenosine 5'-triphosphate disodium salt hydrate | sigma             | Cat. #:A2383       |                                                                     |
| chemical compound, drug | Nitro Blue Tetrazolium                          | Sigma             | Cat. #:N6639       |                                                                     |
| chemical compound, drug | BCIP                                            | sigma             | Cat. #:B-8503      |                                                                     |
| chemical compound, drug | DAPI                                            | Roche             | Cat. #:10236276001 |                                                                     |
| software, algorithm     | ImageJ                                          | Open source       | RRID:SCR_003070    | <a href="https://imagej.nih.gov/ij/">https://imagej.nih.gov/ij/</a> |
| software, algorithm     | SymPhoTime 64                                   | PicoQuant         | RRID:SCR_016263    | Used to analysis flim data                                          |
| software, algorithm     | Zen Blue                                        | Zeiss             | RRID:SCR_013672    |                                                                     |
| software, algorithm     | Patchmaster                                     | Heka              | RRID:SCR_000034    |                                                                     |
| software, algorithm     | Graphpad prism                                  | Graphpad Software | RRID:SCR_002798    |                                                                     |
| software, algorithm     | Clampfit1 0.5                                   | Axon              | RRID:SCR_011323    |                                                                     |
| other                   | Express Plus PAGE                               | Genscript         | Cat. #:M81615C     | For western blotting                                                |

|       |                                |                 |                   |                      |
|-------|--------------------------------|-----------------|-------------------|----------------------|
|       | Gel, 8-16%, 15 wells           |                 |                   |                      |
| other | Western Lightning Plus ECL 680 | PerkinElmer(PE) | Cat.#:NEL105001EA | For western blotting |
| other | MMESS AGE MMACHINE SP6 KIT     | Invitrogen      | Cat.#:AM1340      |                      |

1018

1019

### 1020 *Cloning*

1021 Constructs were designed either using standard restriction enzyme or by homologous  
 1022 recombination methods. *kcnk5b* cDNA was isolated by RT-PCR from regenerating adult fin  
 1023 cDNA library and cloned into MCS region of pcDNA6-myc-6xHIS-tag plasmid (Invitrogen) or  
 1024 pBluescript harboring the *hsp70* zebrafish promoter and GFP coding sequence surrounded by  
 1025 2 miniTol2 sites. Mutagenesis of the Serine345 codon of *Kcnk5b* was performed using  
 1026 QuikChange Mutagenesis kit (Agilent).

1027

### 1028 *Zebrafish Husbandry*

1029 AB strain fish were raised in 10L tanks with constantly flowing water, 26°C standard light-dark  
 1030 cycle (Brand et al., 2002) in either a Schwarz (DFG-Center for Regeneration, TU Dresden) or  
 1031 HaiSheng aquarium (ShanghaiTech University) systems. Transgenic lines harboring the  
 1032 different *kcnk5b* transgenes were created by injecting 300 µg of each construct together with  
 1033 mRNA of Tol2 transposase (Balciunas et al., 2006). Fish harboring Tg[7XTCF-  
 1034 *Xla.sam:mCherry*] transgene are deposited in the European Zebrafish Resource Center. Fish  
 1035 embryos and larva were raised in 1xE3 medium (5mM NaCl, 0.17mM KCl, 0.33mM CaCl<sub>2</sub>,  
 1036 0.33mM MgSO<sub>4</sub>, 10<sup>-5</sup>% Methylene Blue) until 10-12dpf, then transferred to aquarium water  
 1037 tanks to grow. Transgenic lines established by screening for GFP expression after heat shock.  
 1038 Experiments used male and female fish equally. Fish experiments were compliant to the general  
 1039 animal welfare guidelines and protocols approved by legally authorized animal welfare  
 1040 committees (Technische Universität Dresden, Landesdirektion Dresden, and ShanghaiTech  
 1041 University, ShanghaiTech Animal Welfare Committee).

1042



1043 *Heat-shock induction of transgenes*

1044 Parents of heat-shock-driven transgenic lines were either outcrossed to same-strain wild-type  
1045 fish or to fish harboring Tg[7XTCF-Xla.sam:mCherry]transgene. Progeny were collected in  
1046 1xE3 and raised at 28<sup>0</sup>C. Carriers were confirmed positive for their respective transgenes by a  
1047 single heat shock at 37<sup>0</sup>C for 1 hour. For embryo experiments, heat shock was at 12hpf or 32  
1048 hpf (pectoral fin bud) in 37<sup>0</sup>C E3 medium for 30 min. For larva the heat shock was in 37<sup>0</sup>C E3  
1049 medium for 30 min. at 2 dpf. For adult fin, 6 month-old fish underwent a daily heat-shock  
1050 regimen: first, sedated in 0.04% tricane in aquarium water, then placed in conical tubes  
1051 containing 0.04% tricane in aquarium water to allow continued gill movement in oxygenated  
1052 water and allow the caudal fins to be exposed to 37<sup>0</sup>C water for 7 min. After heat shocking the  
1053 caudal fin, the fish were returned to flowing aquarium water and monitored daily. Caudal fin  
1054 measurements were made from the base of the fin to the distal tip along the third fin ray of each  
1055 fin lobe counting in from the dorsal-most and ventral-most sides. Body lengths were determined  
1056 by measuring the most anterior point of the jaw to the base of the caudal fin. Larval finfold  
1057 measurements were from the ventral-most to dorsal-most points of the caudal finfold or from  
1058 the anterior-most to the posterior-most points of the ventral finfold along the body length. Body  
1059 lengths of larva were measured from the anterior-most point of the jaw to the posterior-most  
1060 point of the somatic musculature.

1061

1062 *Western Blotting*

1063 Fins were amputated and snap frozen in liquid nitrogen and homogenized in RIPA buffer  
1064 (Proteintech, B100020) with protease inhibitor (Pierce, 88666) and then rotated at 4<sup>0</sup>C for 2h  
1065 to lysate cells thoroughly. Protein was collected and concentration was quantified by BCA  
1066 assay (MDBio, KT054-200rxn) after centrifuge at 12000rpm at 4<sup>0</sup>C for 20min. Then gel  
1067 electrophoresis was conducted at 120V for 90min using page gels (Genscript, M81615C),  
1068 protein were then transferred to PVDF membranes (Bio-Rad, 1620177). Anti-lef1 (1:1000,  
1069 Cell Signaling Technology, 2230T, RRID: AB\_823558), Anti-shh (1:1000, Novus, NBP2-  
1070 22139, RRID: AB\_331149), Anti- $\beta$ -catenin (1:1000, Cell Signaling Technology, 9562L),  
1071 Anti- $\beta$ -Actin pAb-HRP-DirecT (1:2000, MBL, PM053-7, RRID: AB\_10697035) were used  
1072 as primary antibodies to incubate overnight at 4<sup>0</sup>C. Anti-Rabbit IgG (1:20000, Jackson, 711-  
1073 036-152, RRID: AB\_2340590) were used as secondary antibody and blots were detected using  
1074 ECL detection (PerkinElmer (PE), NEL105001EA), and Image J software (RRID:  
1075 SCR\_003070) was used for density quantification.

1076

1077

1078 *In situ hybridization*

1079 mRNA probes were made from RT-PCR products isolated from 2 dpf zebrafish embryos 6  
1080 hours after 37.5°C heat shock. The primer sequences for generating the probes are F- *shha*:5'-  
1081 TGCGGCTTTTGACGAGAGTGC-3'R-*shha*: 5'-GGTAATACGACTCACTATAGGG  
1082 TTTCCCGCGCTGTCTGCCG-3' F-*lefl* : 5'-GAGTTGGACAGATGACCCCTCCTC-3'; R-  
1083 *lefl*: 5'-GGTAATACGACTCA CTATAGGGGCAGACCATCCTGGGTAAAG-3'. *in vitro*  
1084 transcription reagents are from Promega. Isolated fish fins were surgically isolated and  
1085 incubated in 4% PFA in 1xPBS at 4°C overnight with gentle rocking. Samples were  
1086 subsequently washed 5 times in 1xPBS and then dehydrated by incubation for 15 min in a  
1087 graded series of increasing methanol/1xPBS solutions (25%, 50%, 75%, 3x 100%) on ice. Fins  
1088 were then incubated in 100% methanol for  $\geq$ 2hrs at -20°C. Samples were then rehydrated using  
1089 the reversed dehydration series of methanol/1xPBS solutions). Samples were then incubated  
1090 more than 4x in 1xPBS to remove all methanol, and subsequently incubated in 10 $\mu$ M Proteinase  
1091 K for 10 min at RT. Samples were then incubated 20 min. in 4% PFA/1xPBS to inactivate the  
1092 Proteinase K. Samples were incubated in 1xPBS 6x 10 mins to remove the PFA, then incubated  
1093 in pre-hybridization buffer for 2 hours at 65°C. Samples were subsequently incubated in the  
1094 hybridization solution containing 200ng/ml of each mRNA probe  $\geq$  14 hrs at 65°C. Samples  
1095 then were washed with successive wash steps to remove unbound probe and prepare for  
1096 antibody incubation: twice 2xSSC/50% deionized formalin at 65°C, twice 2xSSC/25%  
1097 deionized formalin at 65°C, 2xSSC at 65°C, twice 0.2xSSC at RT, 6 times 1xPBST (1xPBS  
1098 with Tween-20), once in blocking solution [2% Bovine albumin (Sigma-Aldrich, A3294-100G),  
1099 2% Sheep Serum (Meilunbio, M134510)] at RT for 4 hours. Samples were incubated with Anti-  
1100 digoxigenin-AP Fab Fragment (Sigma-Aldrich, 11093274910, RRID: AB\_514497) in blocking  
1101 solution  $\geq$ 14 hrs at 4°C. Samples were then washed 6 times with 1xPBST, subsequently  
1102 incubated in [0.1 M Tris-HCl, pH 9.5, 0.1 M NaCl, 0.05 M MgCl<sub>2</sub>] 3 times for 30 min, and then  
1103 in Nitro Blue Tetrazolium (Sigma-Aldrich, N6639-1G) and 5-bromo-4-chloro-3-indolyl  
1104 phosphate (Sigma-Aldrich, 136149) in [0.1 M Tris-HCl, pH 9.5, 0.1 M NaCl, 0.05 M MgCl<sub>2</sub>]  
1105 at RT  $\geq$ 8hrs. Samples images under Stemi508 stereoscope (Zeiss) with Axiocam ERc5s digital  
1106 color camera (Zeiss) and Zen2.3 software (Zeiss, RRID: SCR\_013672). For signal areas and  
1107 signal intensities analyses, images of the *shh in situs* were transferred to Fiji ImageJ (RRID  
1108 SCR\_003070). The stained regions were traced using “free ROI” and then quantitated using the

1109 “measure” function under the “analysis” menu to calculate the number of pixels contained in  
1110 the stained area. For signal intensity analysis, the signal region and adjacent unstained regions  
1111 were measured by “free ROI” selection and the mean intensity pixel values were determined  
1112 from the “measure” function under the analysis menu by subtracting the mean value of the  
1113 unstained region from the mean value of the signal region for each fin bud.

1114

### 1115 *Immunohistochemistry*

1116 Zebrafish fins or larvae euthanized in 1% Mesab were fixed in 4%PFA/1xPBS and embedded  
1117 in 1% agarose (CryoStar NX50, Thermofisher) or tissue freezing medium (Leica, 14020108926)  
1118 on dry ice. (CryoStar NX50, Thermofisher) before cryosectioning. 10  $\mu$ m sections were  
1119 mounted on glass slides (Titan, 02036398) and dried. The tissue freezing medium (Leica) was  
1120 removed in ddH<sub>2</sub>O for 10 min. Sections were permeabilized in 0.1%Triton-X for 5min and  
1121 incubated in 1% BSA/1xPBS/0.1%Tween-20 (PBST) at room temperature for 30min. Sections  
1122 were incubated in a mouse-anti-GFP (Invitrogen, MA5-15349, RRID:AB\_10987186) solution  
1123 (1:400), Anti- $\beta$ -catenin (Cell Signaling, 9562L, RRID: AB\_331149), Anti-Lef1 (Cell Signaling,  
1124 2230T, RRID: AB\_823558) solution (1:1000), Anti-Shh (Novus, NBP2-22139, RRID:  
1125 AB\_2883969) solution (1:1000 dilution), rabbit-anti-mCherry antibody (Invitrogen, P5-34974,  
1126 RRID: AB\_2552323) solution (1:2000 dilution) in PBST at 4°C overnight (>12 hours). The  
1127 primary antibody solution was replaced by a goat-anti-mouse-GFP (Abcam, ab150113, RRID:  
1128 AB\_2576208), goat-anti-rabbit-mCherry secondary antibody (Abcam, ab150078, RRID:  
1129 AB\_2722519) solution (1:2000 dilution) in PBST and incubated at RT in the dark for 60 min.  
1130 The secondary antibody solution was then replaced with DAPI solution (Roche, 10236276) in  
1131 the dark at room temperature for 5 min. DAPI were washed away in 1xPBST 3x 5-min  
1132 incubations at RT. Coverslips (Titan, 02036401) were mounted with a 40% glycerol solution  
1133 and sealed with nail polish. The sections were visualized using an LSM710 upright scanning  
1134 confocal (Zeiss) or a LSM880 inverted scanning confocal (Zeiss) with ZENBlue software  
1135 (Zeiss, RRID: SCR\_013672). Images were processed with Fiji software (RID: SCR\_003070).

1136

### 1137 *$\beta$ -catenin nuclear analysis on IHC cross sections of fins*

1138 Using Fiji ImageJ, multiple nuclei of cells in IHC fin cross section image of control fins were  
1139 manually measured, and a mean mRFP fluorescence intensity value was calculated. This  
1140 mean value was used as the baseline for assessing nuclear  $\beta$ -catenin levels.  $\beta$ -catenin nuclear

1141 values for all the nuclei in each cross section were assessed with ImageJ by splitting the  
1142 combined images of  $\beta$ -catenin and DAPI and using DAPI to have Fiji ImageJ define and  
1143 select all nuclei in the image. The nuclear  $\beta$ -catenin levels were determined in selected nuclei  
1144 by intensity analysis in Fiji ImageJ (RID: SCR\_003070), which provided a numeric value for  
1145 the  $\beta$ -catenin channel in all the nuclei of each section.

1146

#### 1147 *Cell Transplantations*

1148 Transgenic fish lines [*hsp70:kcnk5b-GFP*] and [7XTCF-Xla.sam:mCherry] were inbred for 20-  
1149 30 min before embryos were collected in E3. The genotypes of the parents and of the imaged  
1150 progeny were confirmed to be homozygous for the 7XTCF-Xla.sam:mCherry transgene by  
1151 qPCR. Primers for genomic  $\beta$ -actin locus were used as DNA content standardization. The cycle  
1152 procedure was at 50.0°C for 2 min, 95.0°C for 10 min in the hold step; 95.0°C for 15 s, 55.0°C  
1153 for 20s for 40 routine in the elongation step; 95.0°C for 15s, 60.0°C for 1 min, 95.0°C for 15s in  
1154 the melting curve step. The embryos were left to develop in E3 for 3-3.5 hours at 28°C until the  
1155 blastula stage. Embryos were then placed in agarose ridges for easy access under a Zeiss  
1156 stereomicroscope and cells from the [*hsp70:kcnk5b-GFP*] embryos were isolated by air suction  
1157 via a glass needle mounted on a Precision Instruments piston. The [*hsp70:kcnk5b-GFP*] cells  
1158 were then transplanted into the [7XTCF-Xla.sam:mCherry] embryos. The transplants were  
1159 carefully moved from the agarose into clean 90mm dishes with fresh E3 (+/- 20-25 per dish)  
1160 and incubated at 28°C. One or two days after transplantation, fish were heat shocked for 1 hour  
1161 at 37°C. Four hours after heat shock, 48- or 72-hour fish were embedded into 1% low melting  
1162 agarose (Sigma-Aldrich-Aldrich, A9414-250G) supplemented with Mesab in 35mm glass  
1163 bottom confocal dishes (Cellvis: D35-20-1-N) and turned to their side. Visualized with a  
1164 LSM710 confocal argon laser microscope (Zeiss) with ZENBlue software (Zeiss, RRID:  
1165 SCR\_013672).

1166

#### 1167 *qRT-PCR*

1168 The cDNA that was used for qRT-PCR was extracted from the HEK293T cells and zebrafish.  
1169 The mRNA was isolated using Tri-Reagent (CWBio, 03917). Then 1 $\mu$ g mRNA was used for  
1170 the reverse transcription to cDNA using 4x gDNA wiper Mix, 5x HiScript III qRT SuperMix  
1171 (Vazyme, L/N 7E350C9). qRT-PCR was performed using 2x ChamQ Universal SYBR qPCR  
1172 Master Mix (Vazyme, L/N TE342F9) with QuantStudio3 machine (Thermofisher). The cycle  
1173 procedure was at 50.0°C for 2 min, 95.0°C for 10 min in the stage 1; 95.0°C for 15 s, 60.0°C for

1174 20s for 40 routine in the stage2; 95.0°C for 15s, 60.0°C for 1 min, 95.0°C for 15s in the Melt  
1175 Curve. Samples were standardized using the detected  $\beta$ -actin expression for fish mRNA  
1176 isolation and GAPDH for human cell line mRNA isolations. The data was analyzed in the  $\Delta\Delta$ Ct  
1177 method.

1178

### 1179 *Cell Culture*

1180 All cell culture lines were incubated at 37°C, 5% CO<sub>2</sub>, 95% humidity in incubators  
1181 (Thermofisher, FORMA STERI-CYCLE i160) in DMEM medium (Gibco,1199506) with 10%  
1182 FBS (Gibco,1009914) and 1% penicillin streptomycin (Gibco, 15140122). The identity of the  
1183 cell lines was not authenticated, and mycoplasma was not determined. Cell were split to 50%  
1184 density and transfected with Lipofectamine™ (Invitrogen, 11668-019) 12 hours later.  
1185 Expression for the transfected constructs was evaluated by expression of fluorescent marker.

1186

### 1187 *Mycoplasma test*

1188 2  $\mu$  l of DMEM medium from different cultured cells are freshly taken as template. Primers to  
1189 detect mycoplasma are used as F : 5'-GGGAGCAAACAGGATTAGATACCCT-3'; R: 5'-  
1190 TGCACCATCTGTCACTCTGTAAACCTC-3', then standard PCR was conducted (TOYOBO,  
1191 KOD-401). The procedure is: Step1: 98 °C for 2min. Step2: 98 °C for 10s, 55 °C for 30s, and  
1192 68 °C for 30s for 30cycles. Step3:68 °C for 10min, 4 °C to hold. Then gel electrophoresis was  
1193 conducted at 120v for 30min.

1194

### 1195 *FRET-FLIM detection and analysis*

1196 Hek293T cells were transfected with 1 $\mu$ g of pcDNA-*kcnk5b*-GFP and 1 $\mu$ g of the pcDNA6-  
1197 Kirin-FRET sensor (Shen et al., 2019). Fluorescence lifetime imaging measurements were  
1198 made by photon counting the fluorescence emission of CFP using a 2-photon-confocal  
1199 Hyperscope (Scientifica, UK) and PMT-hybrid 40 MOD 5 photon detectors (Picoquant,  
1200 Germany). Counted photon emissions were calculated and analyzed using SymPhoTime 64,  
1201 version 2.4 (Picoquant, Germany, RRID: SCR\_016263).

1202

### 1203 *Electrophysiology*

1204 Transfected HEK293T cells were seeded on glass coverslips (Fisher Brand), and incubated in  
1205 cell culture medium at 37°C, 5% CO<sub>2</sub>, 95% relative humidity for 4-6 hours. The seeded  
1206 coverslips were transferred into Tyrode's solution (138 mM NaCl, 4 mM KCl, 2 mM CaCl<sub>2</sub>, 1  
1207 mM MgCl<sub>2</sub>, 0.33 mM NaH<sub>2</sub>PO<sub>4</sub>, 10 mM Glucose, 10 mM HEPES). Cells were assessed in the  
1208 ruptured-patch whole-cell configuration of the patch-clamp technique using an EPC9 or  
1209 EPC10 amplifier (HEKA) with borosilicate glass pipettes (Sutter Instruments) with 3-6 MΩ  
1210 resistance when filled with pipette solution (130 mM glutamic acid, 10 mM KCl, 4 mM MgCl<sub>2</sub>,  
1211 10 mM HEPES, 2 mM ATP, pH to 7.2). After gigaseal formation, cells were voltage-clamped  
1212 at -80 mV. Potassium conductance was elicited by test pulses from -100 mV to 70 mV (in 10mV  
1213 increments) of 600 ms duration at a cycle length of 10s. The resulting tracings were converted  
1214 into itx files by the ABF Software (ABF Software, Inc., RRID: SCR\_019222) and then analyzed  
1215 using Clampfit™ Software (Molecular Devices, RRID: SCR\_011323). Currents were measured  
1216 at the end of the test pulses.

1217

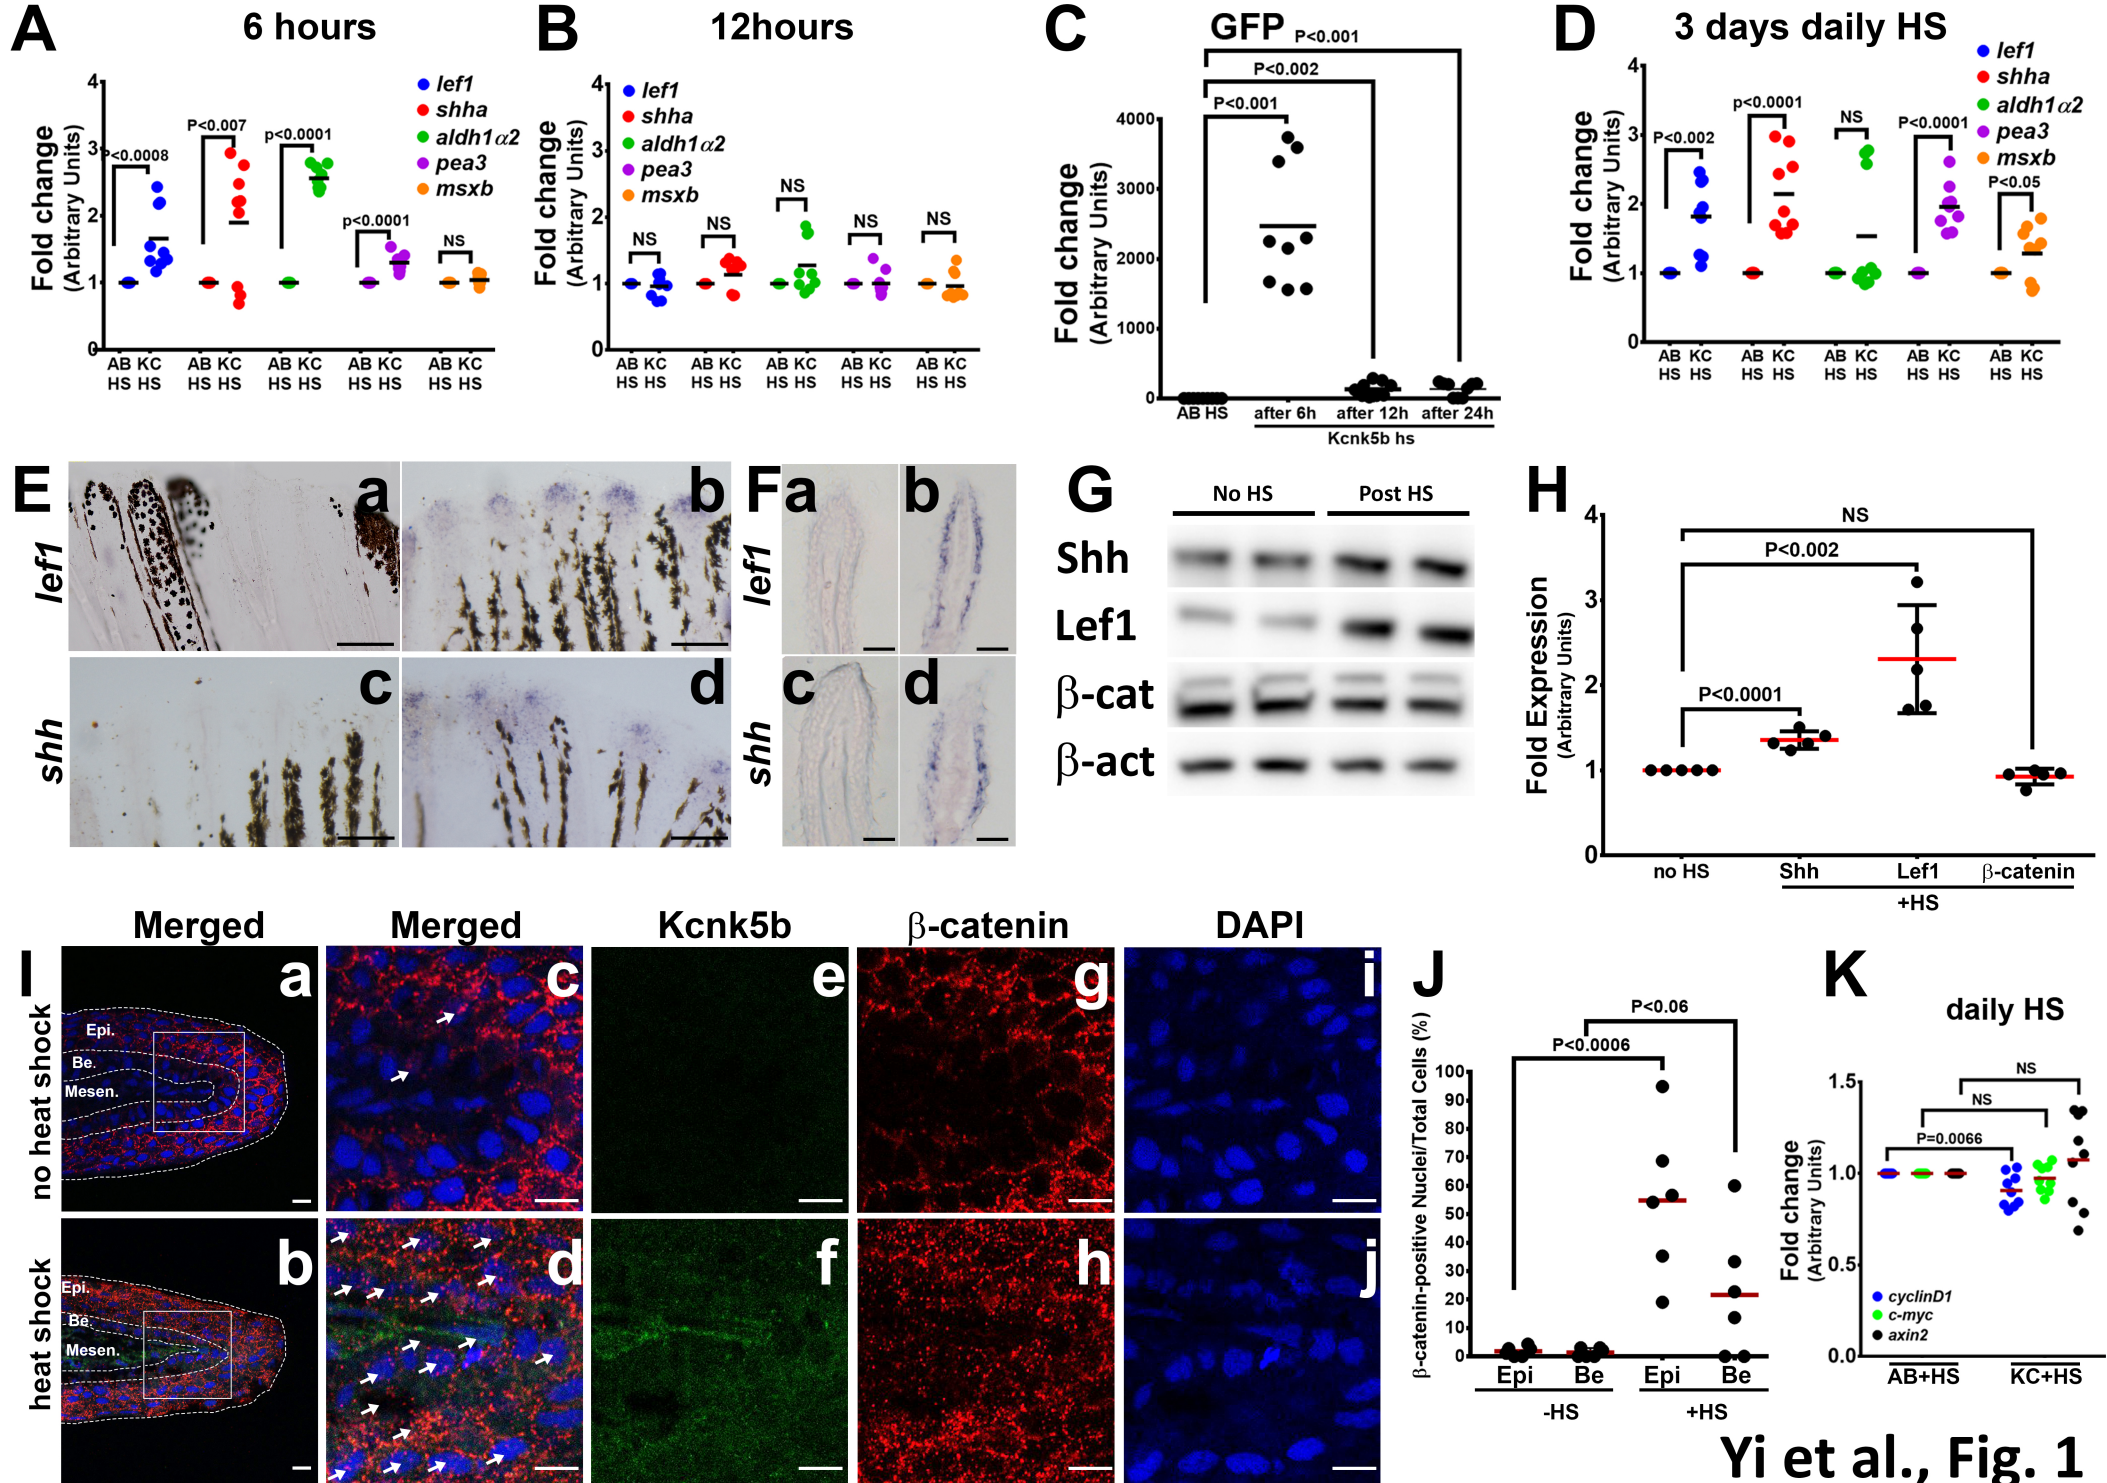

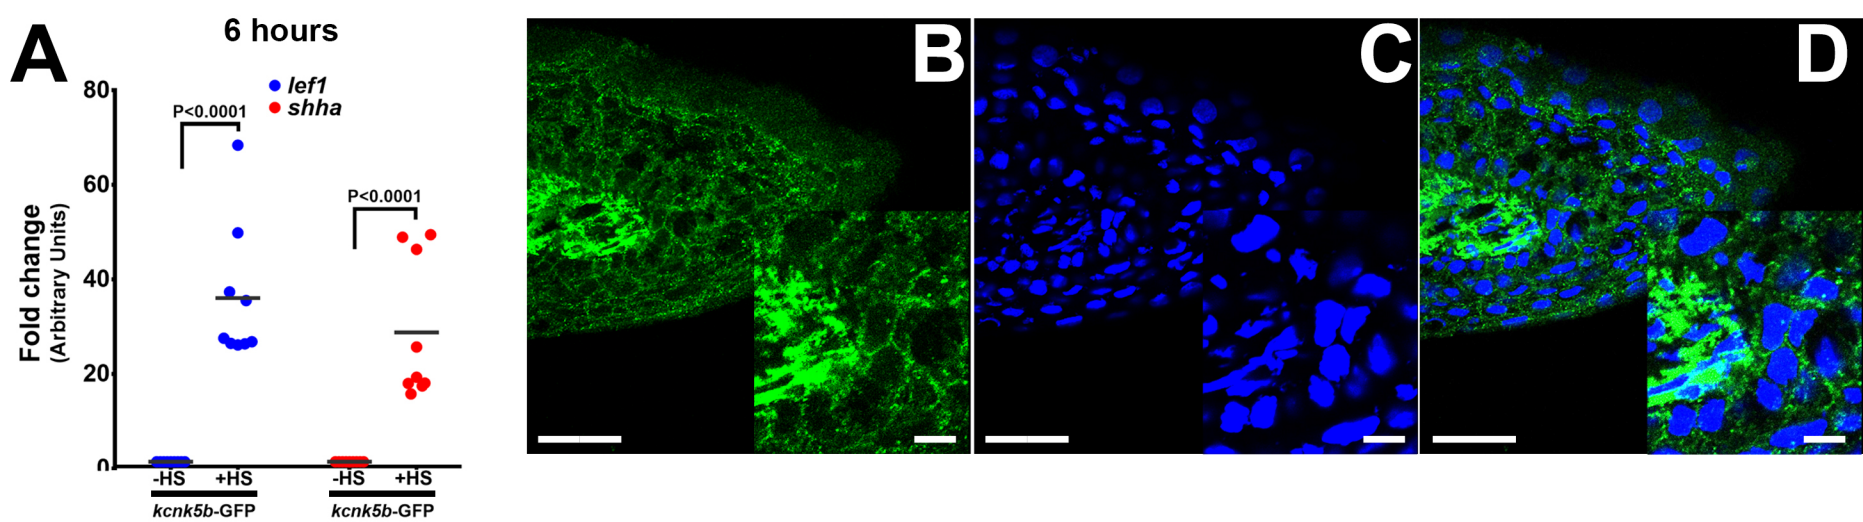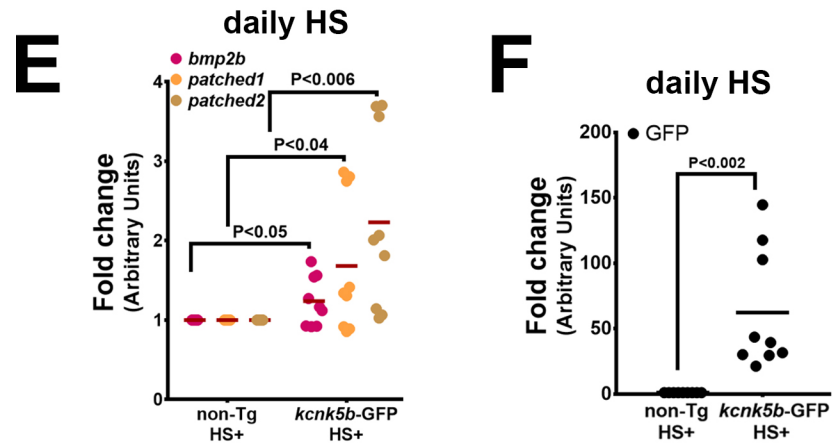



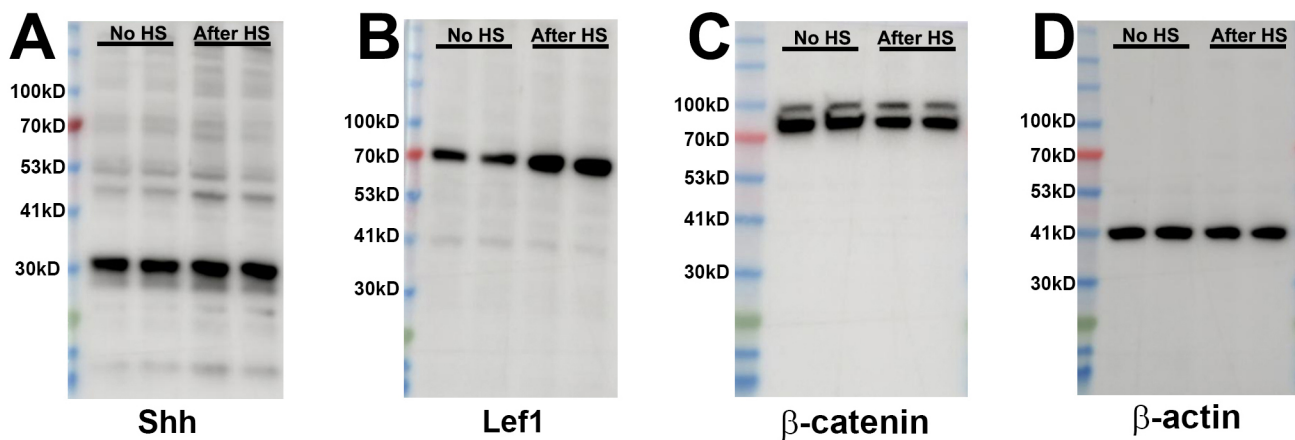

serial section 1

serial section 2

serial section 3

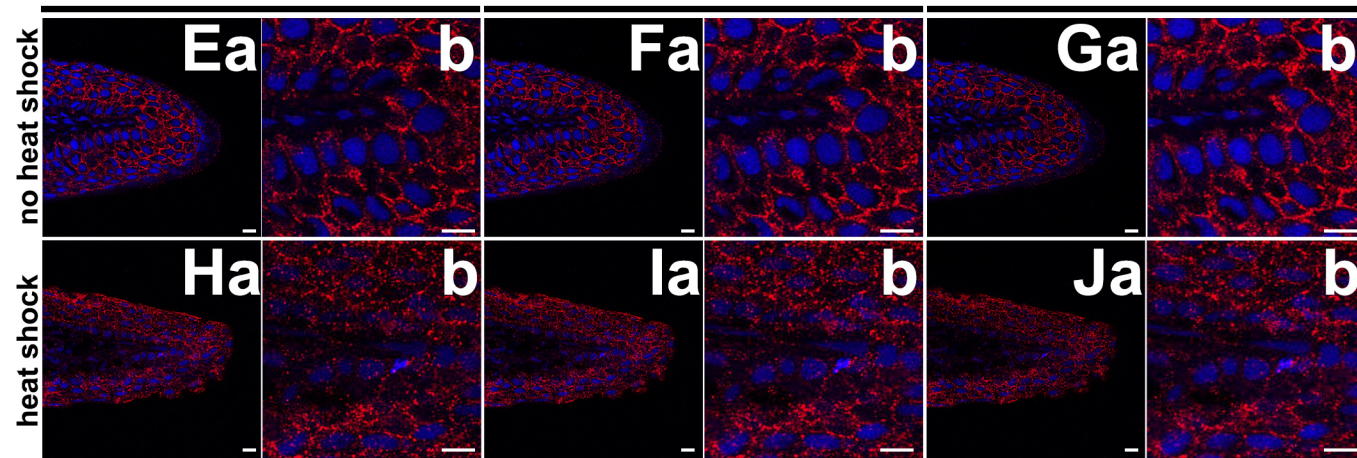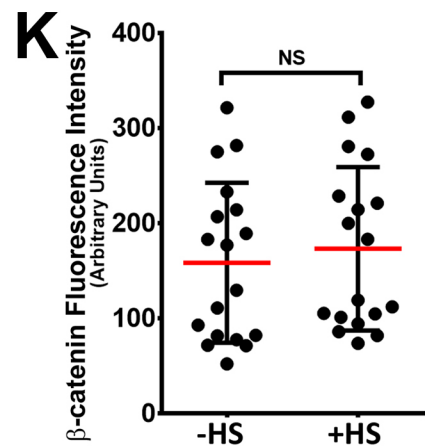

Yi et al., Fig. 1-Suppl. Fig. 2

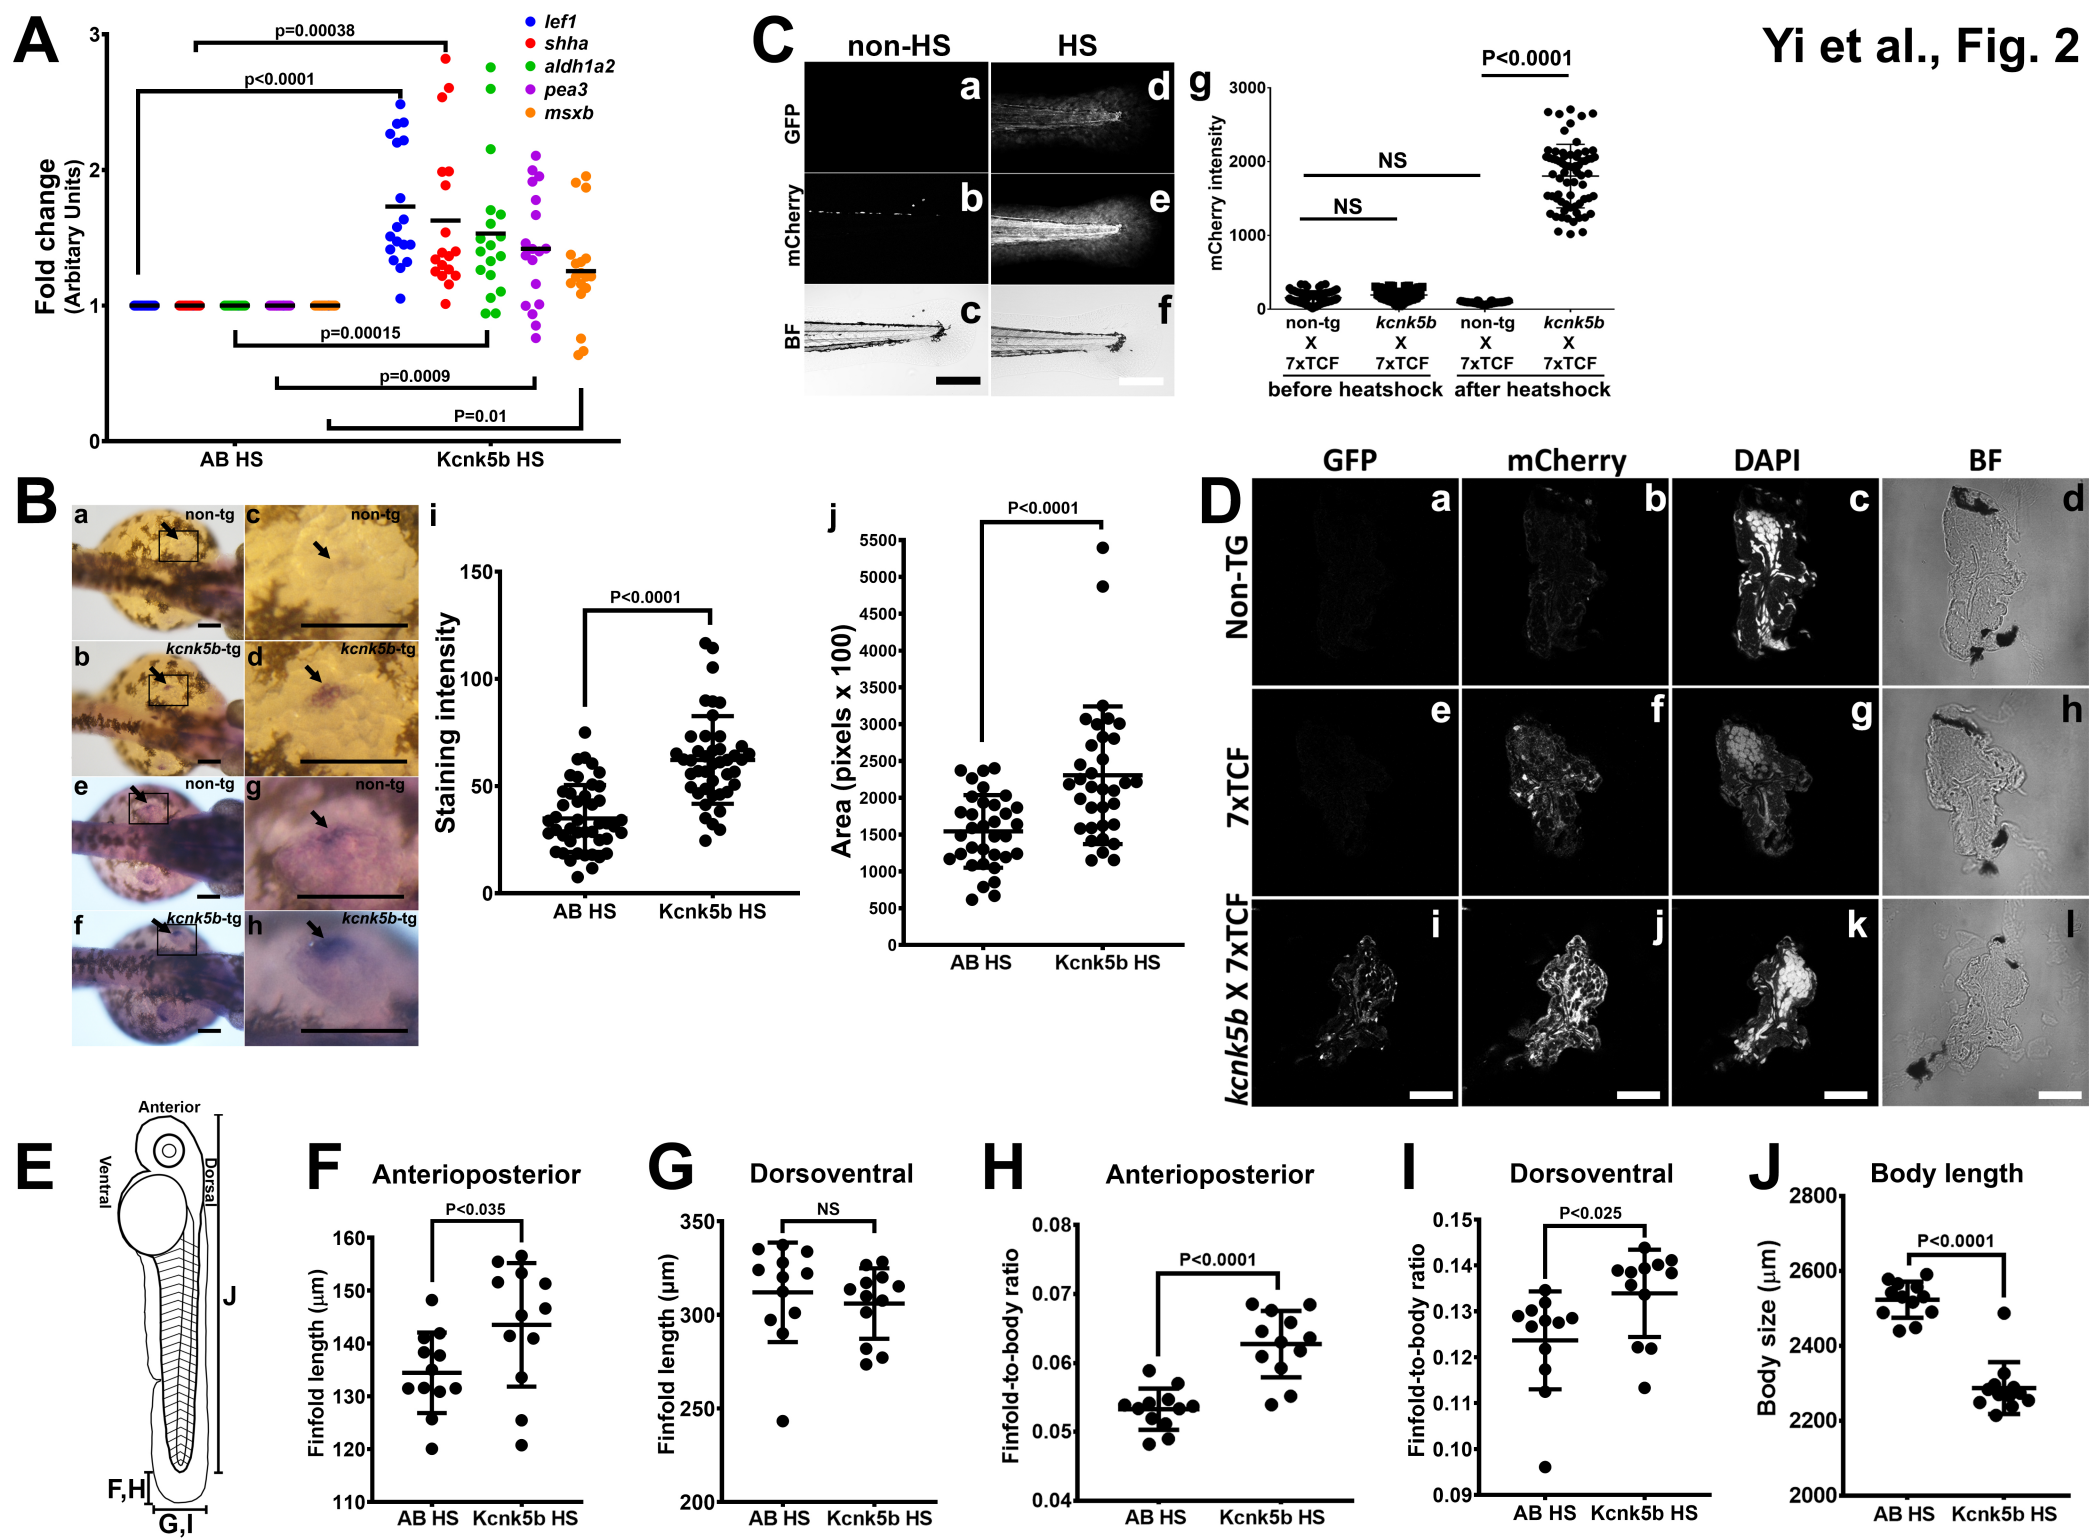



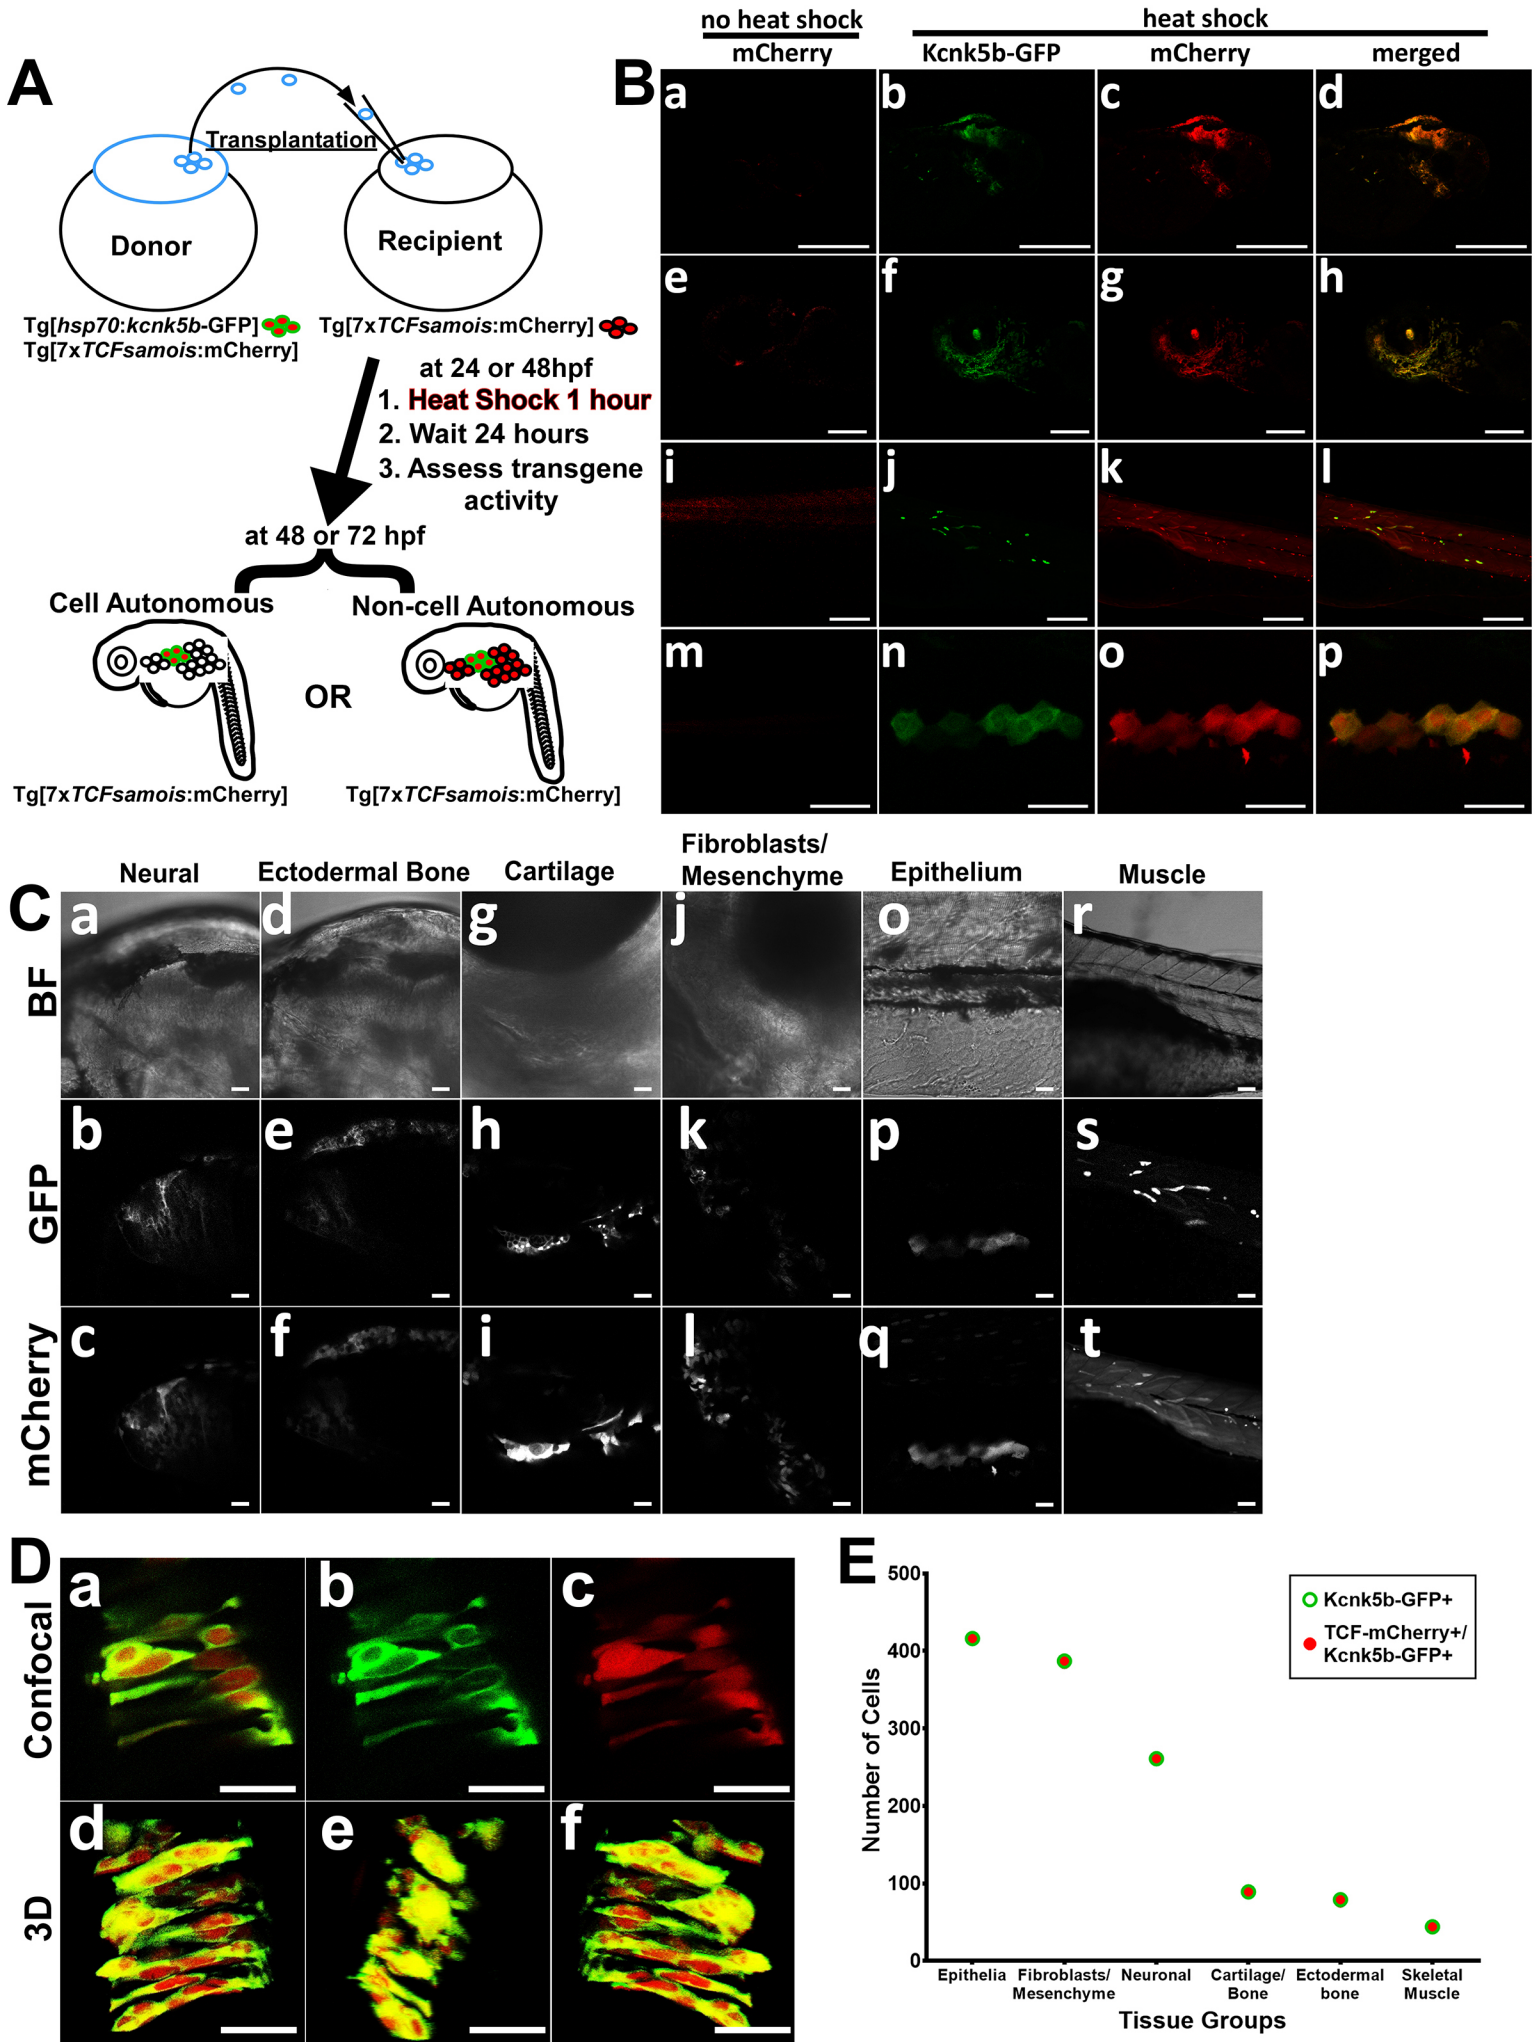

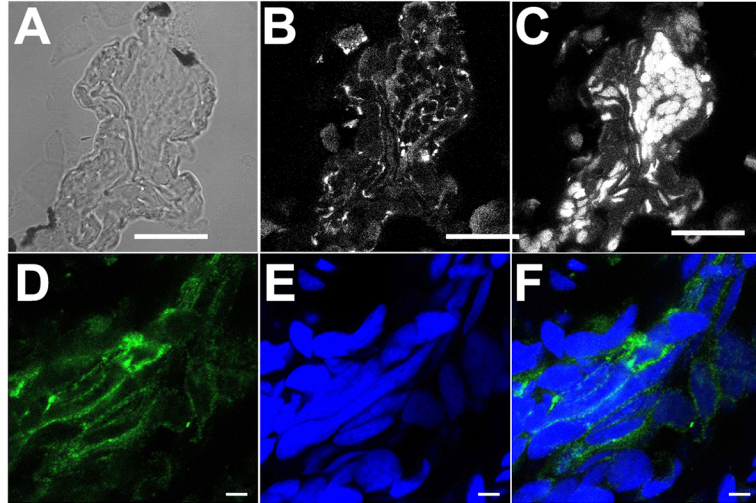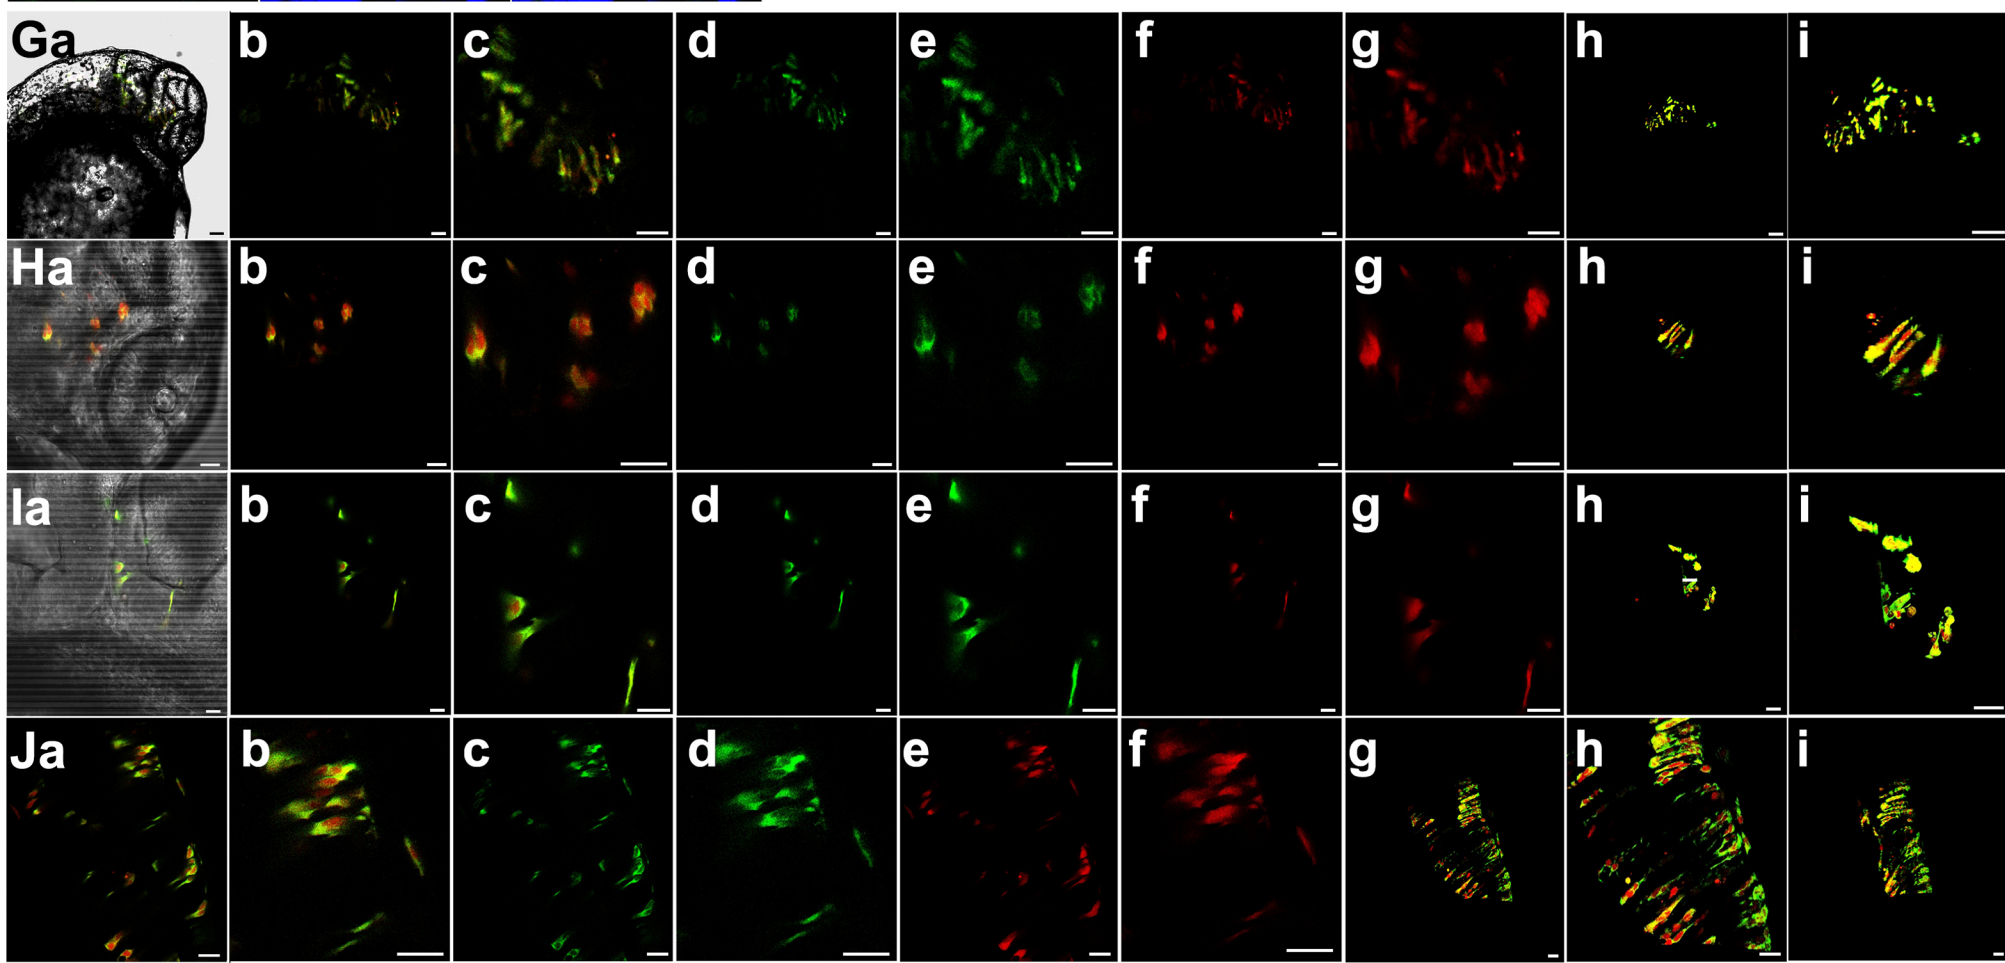

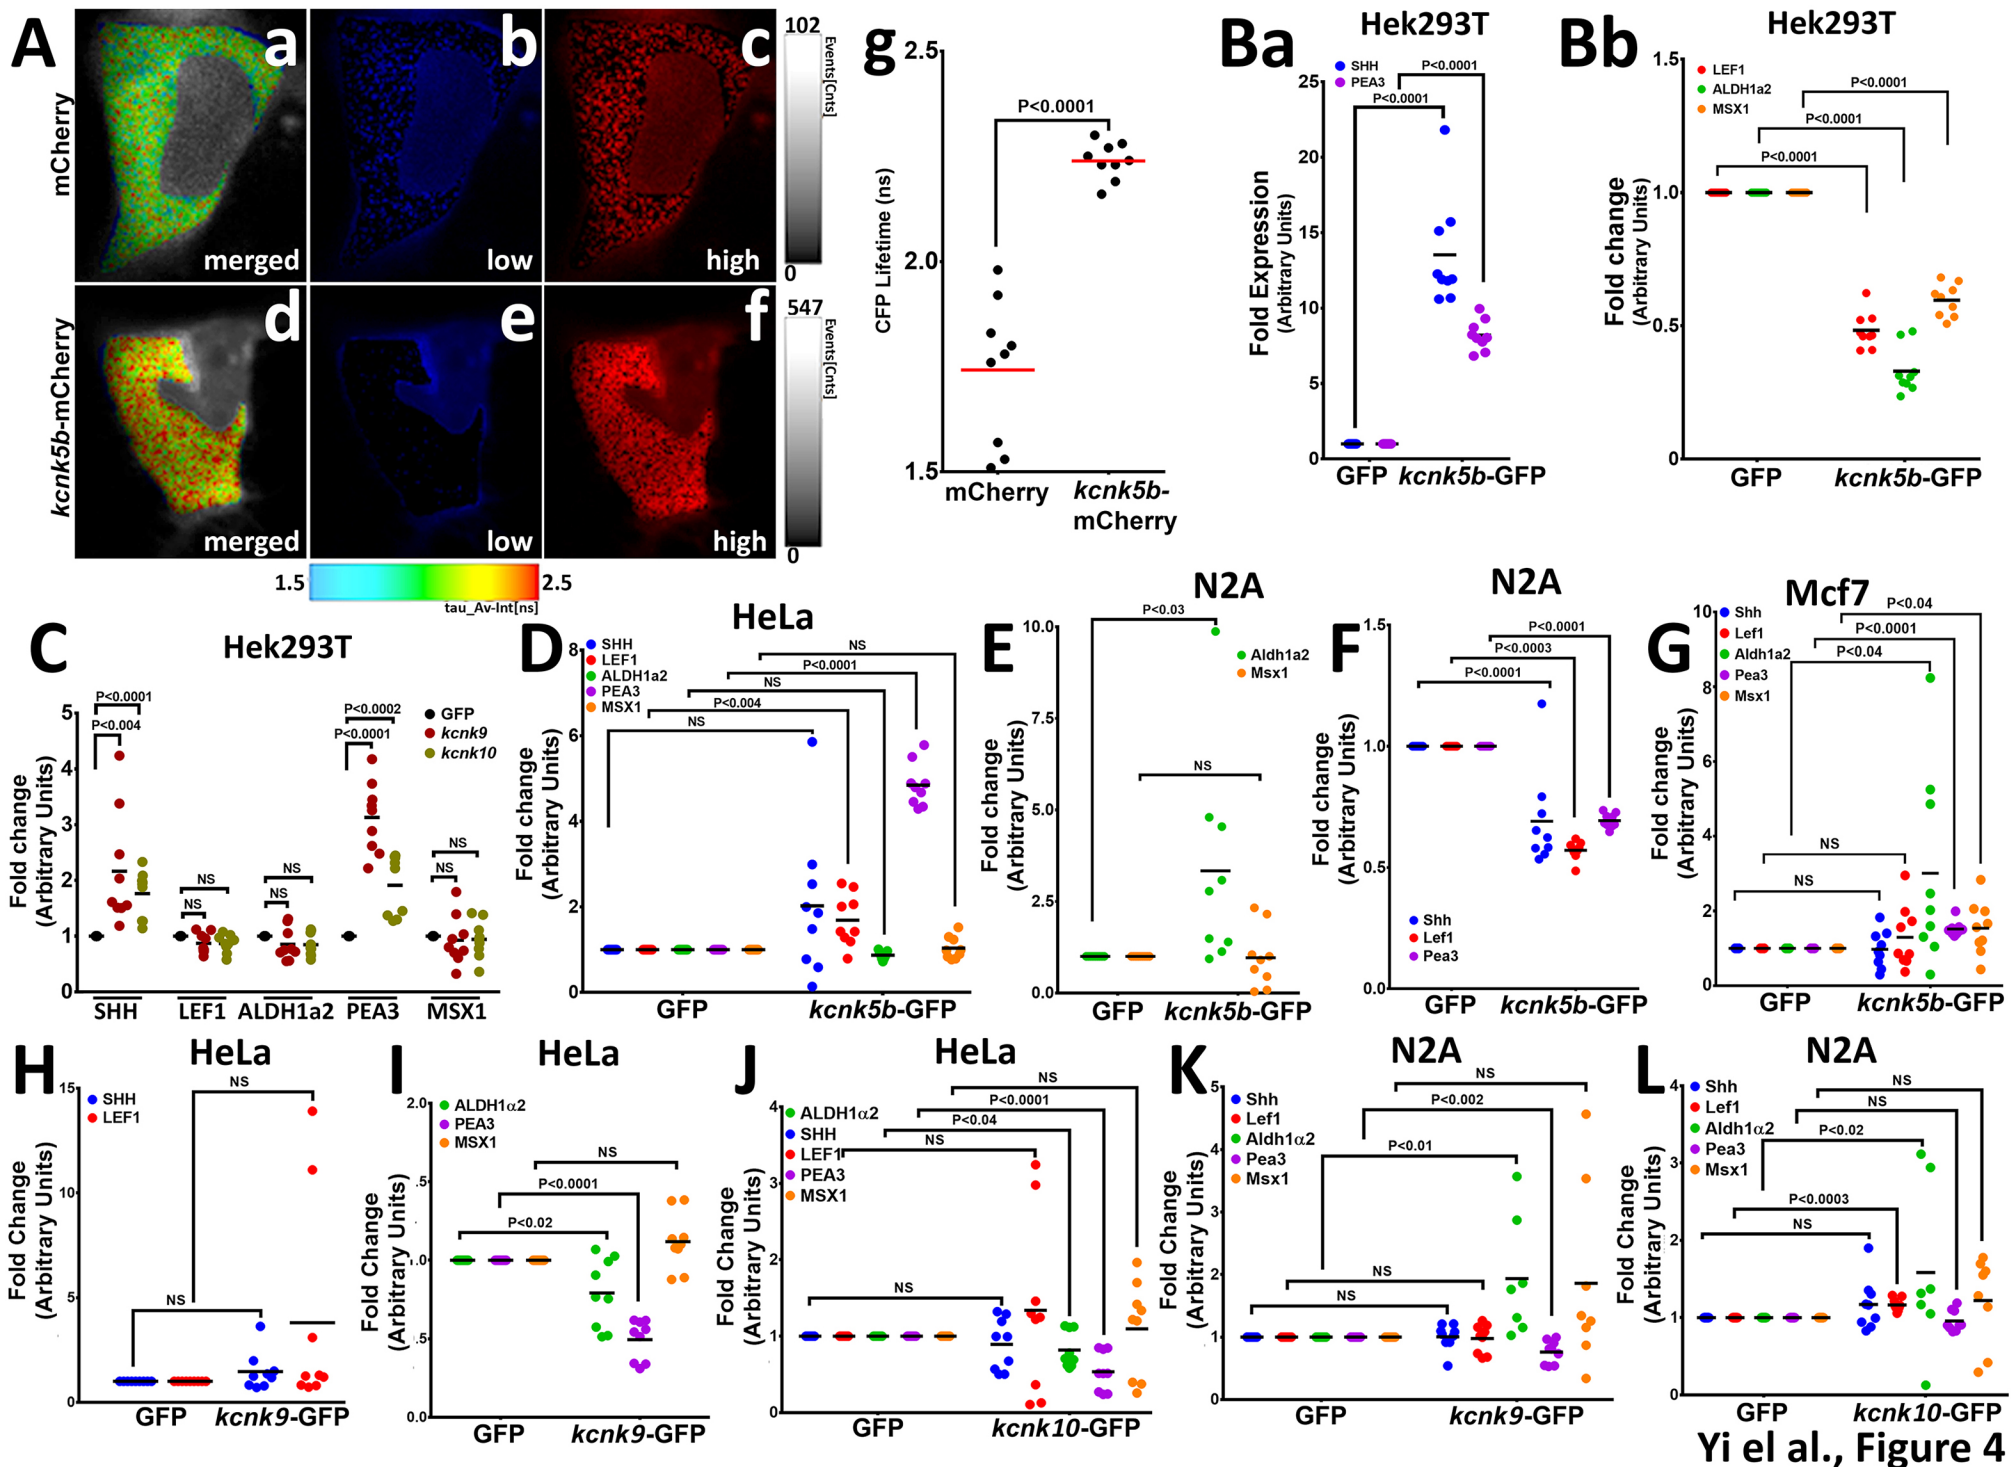

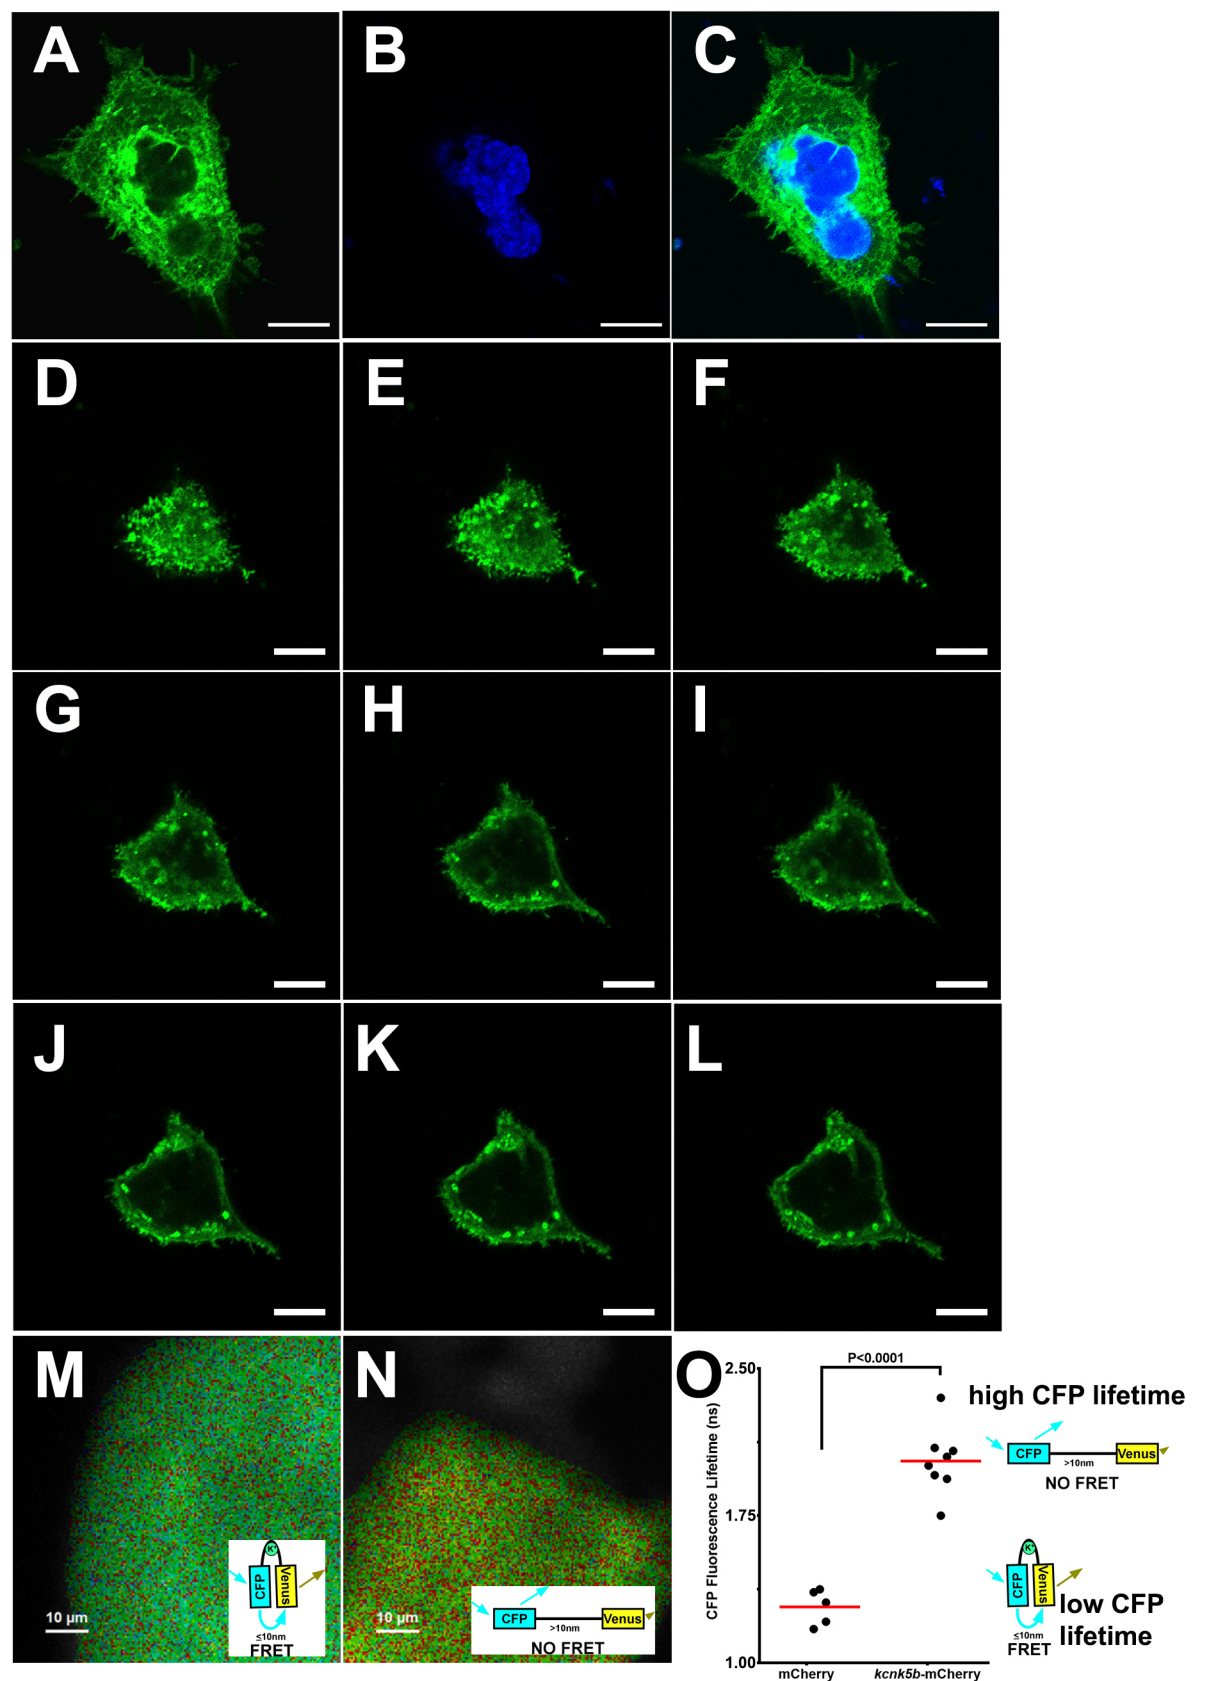

Yi et al., Fig. 4- Suppl. Fig. 1

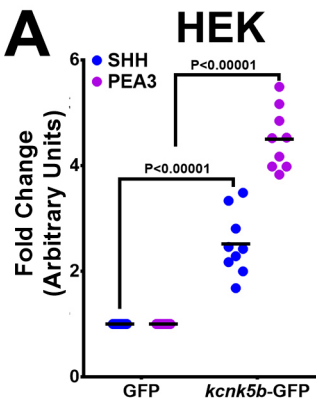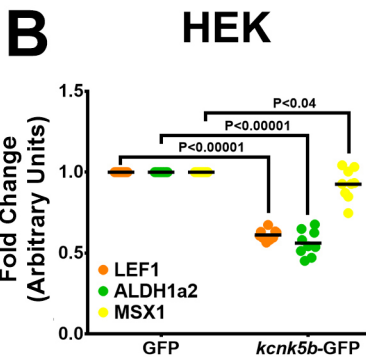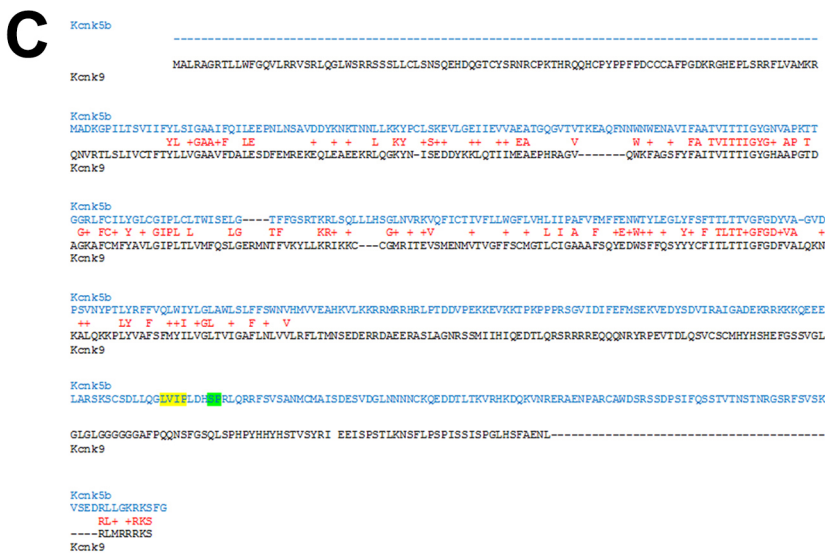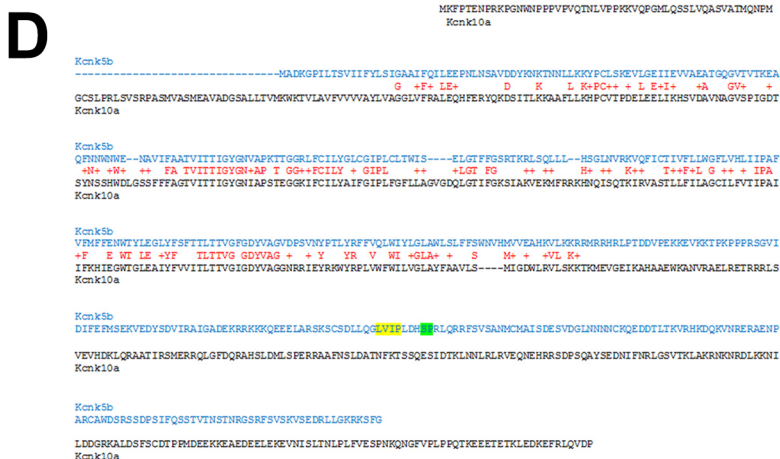



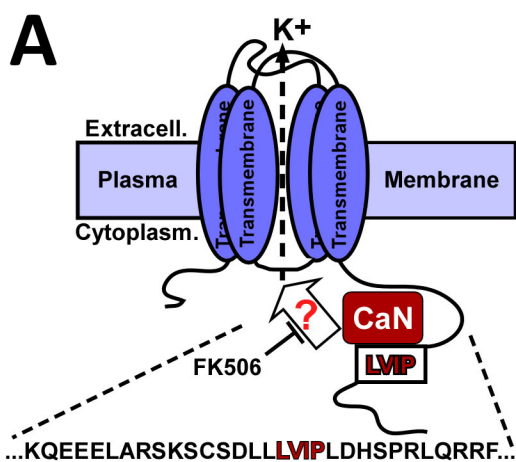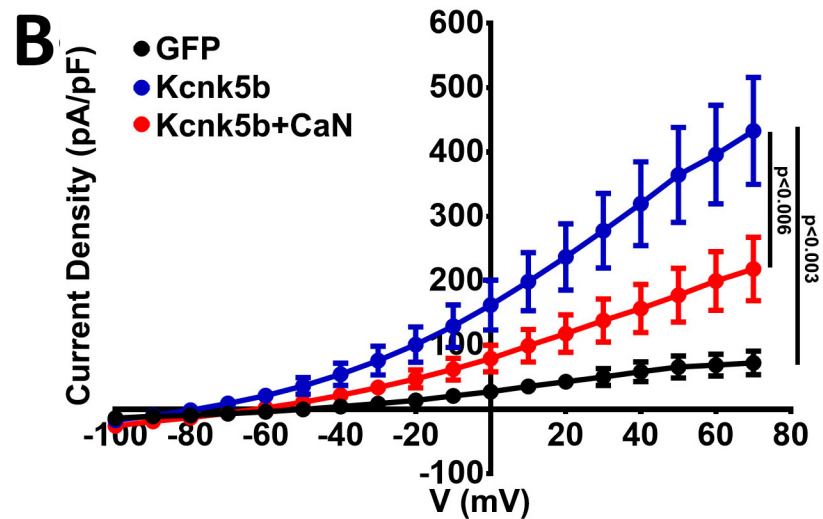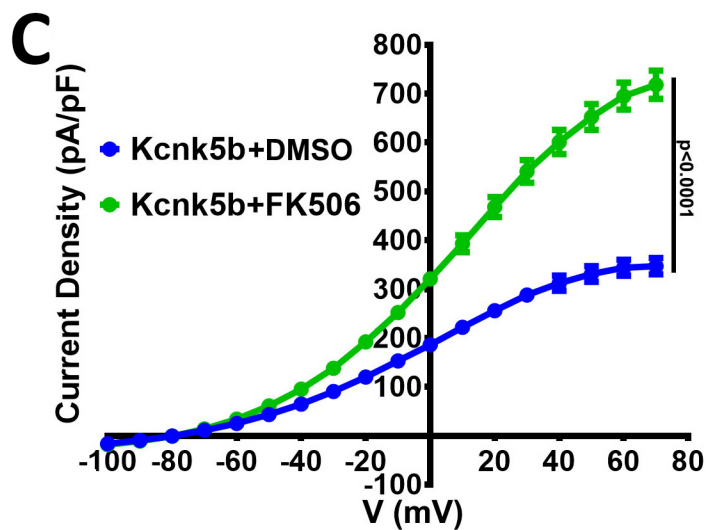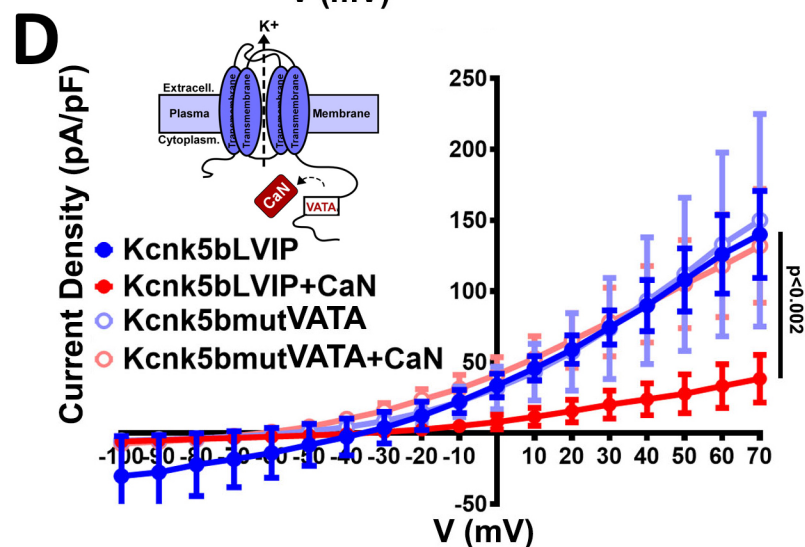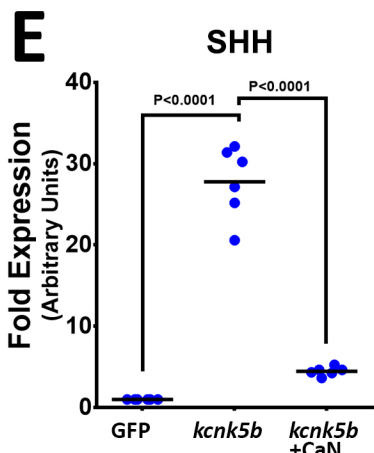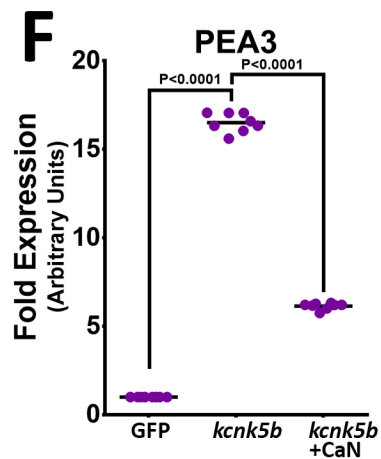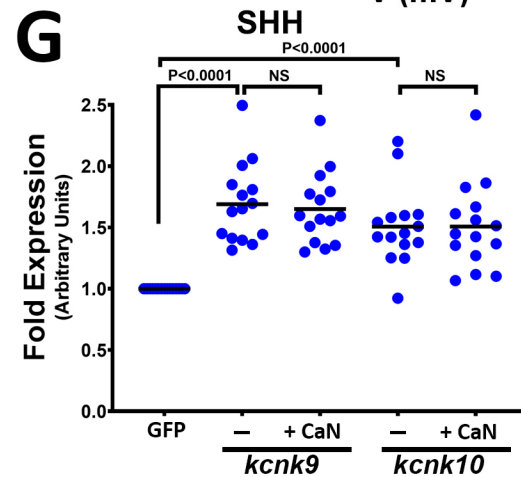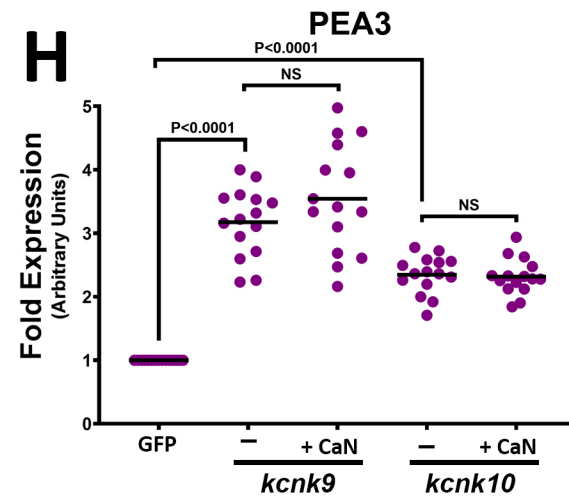

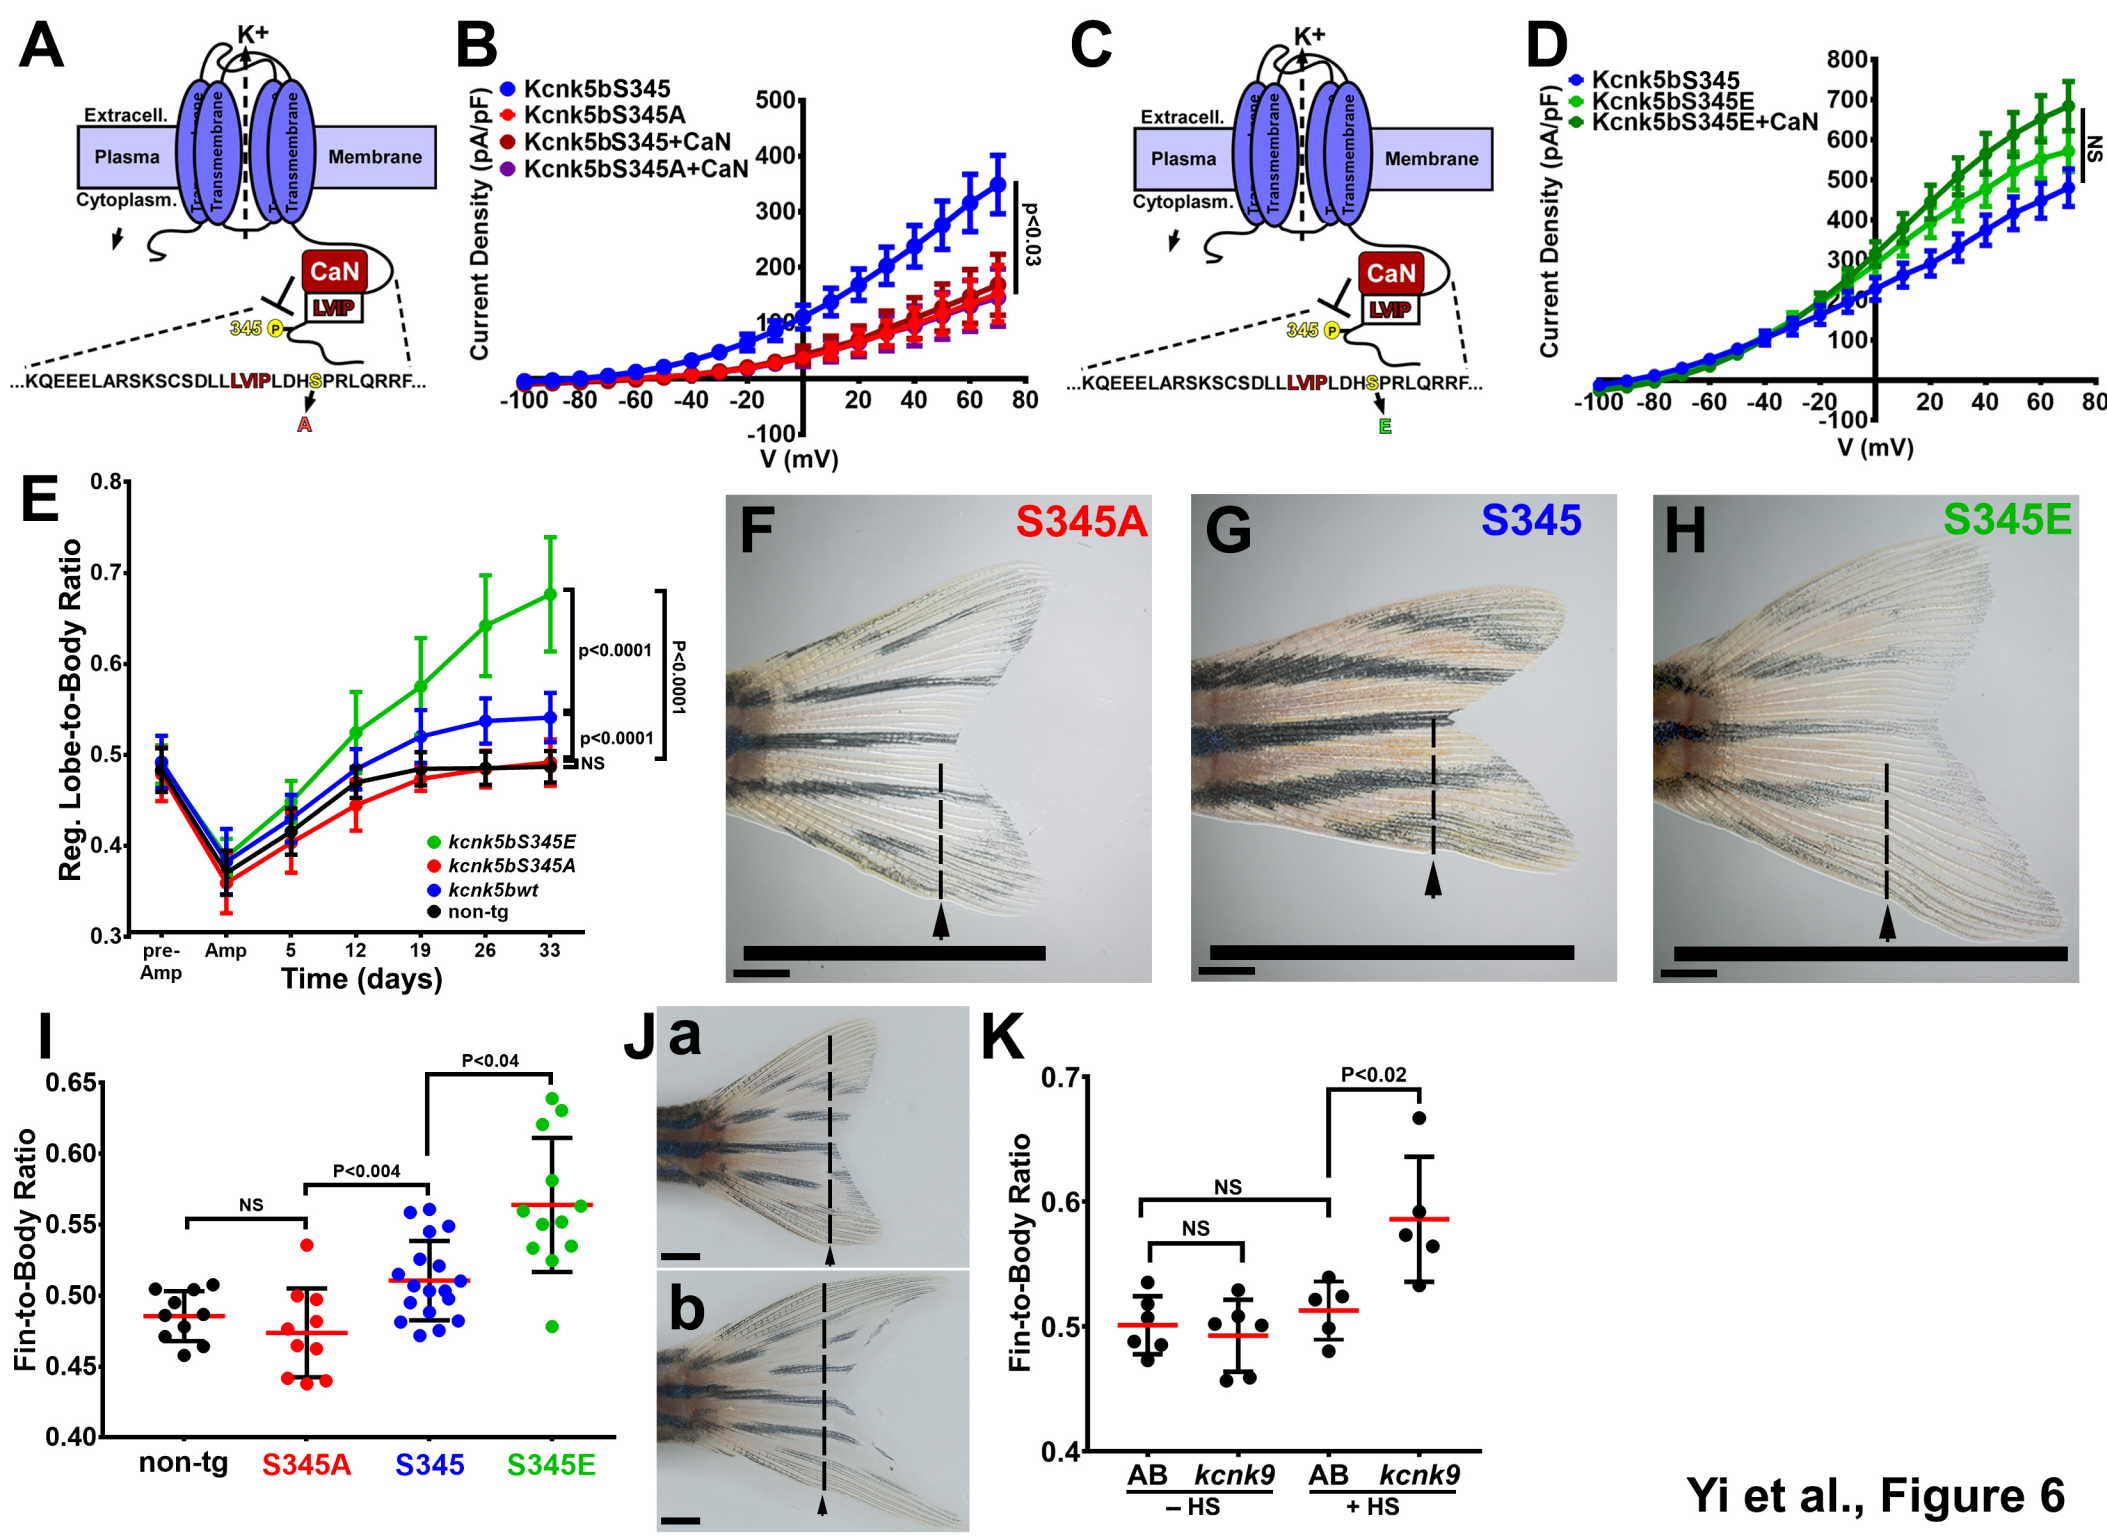

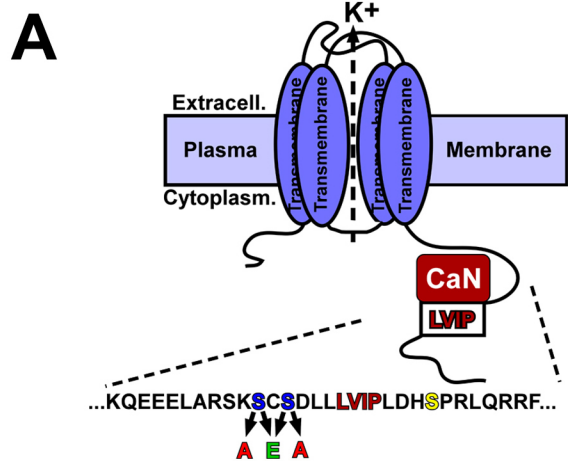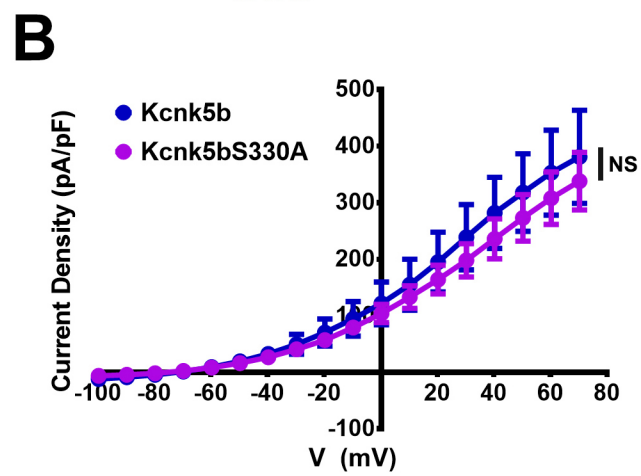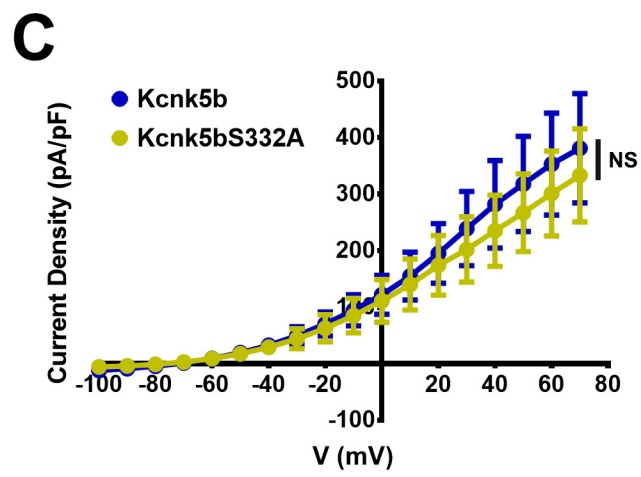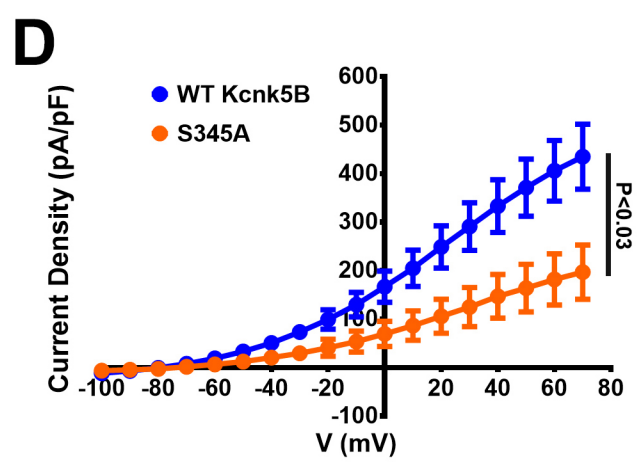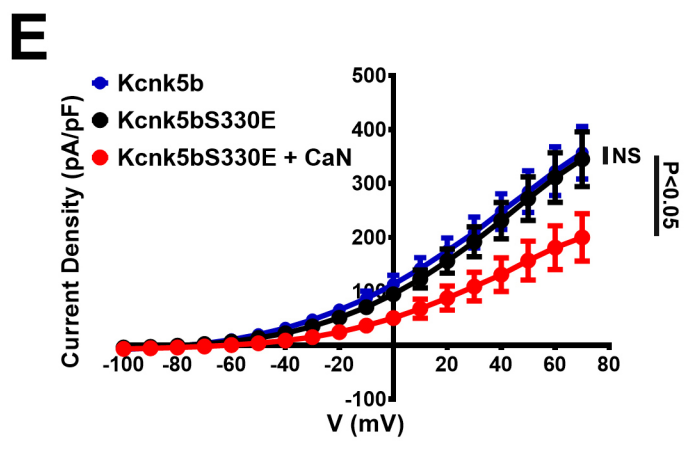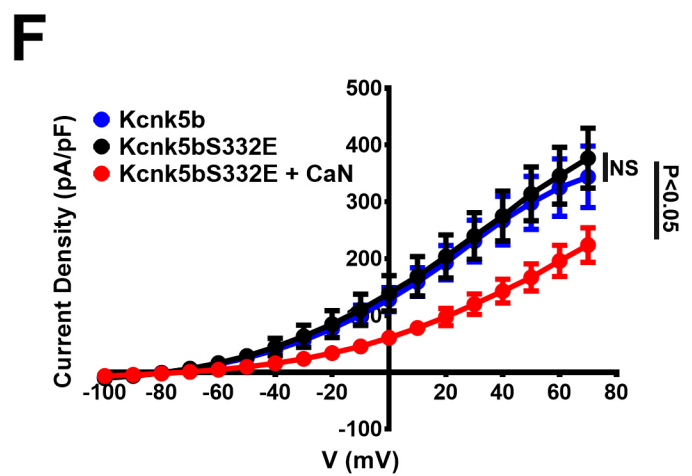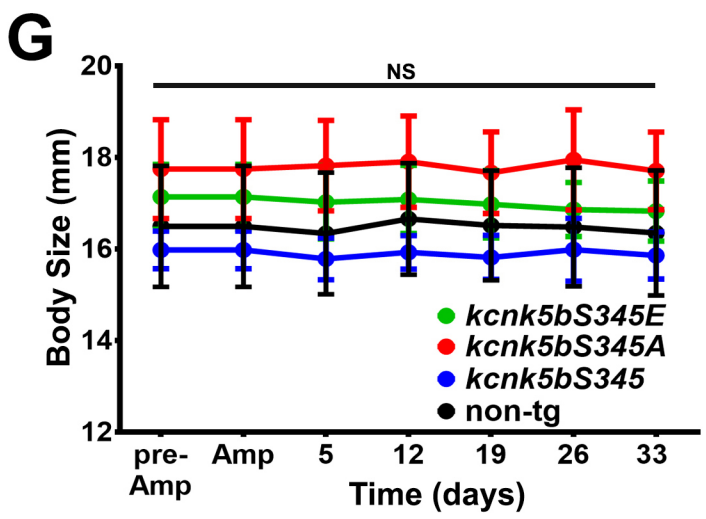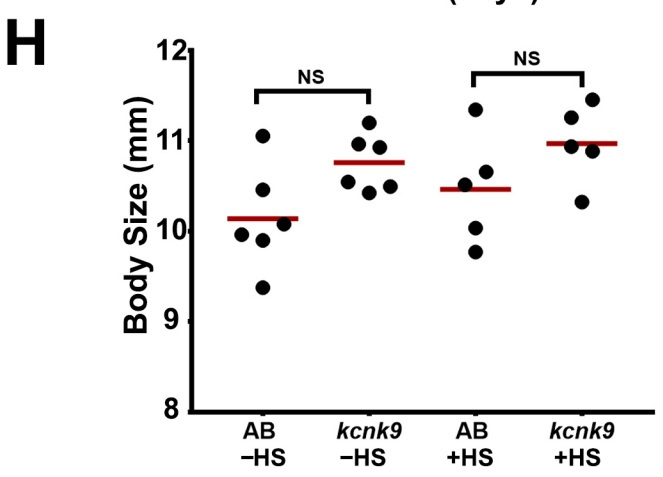

# Scaling Information

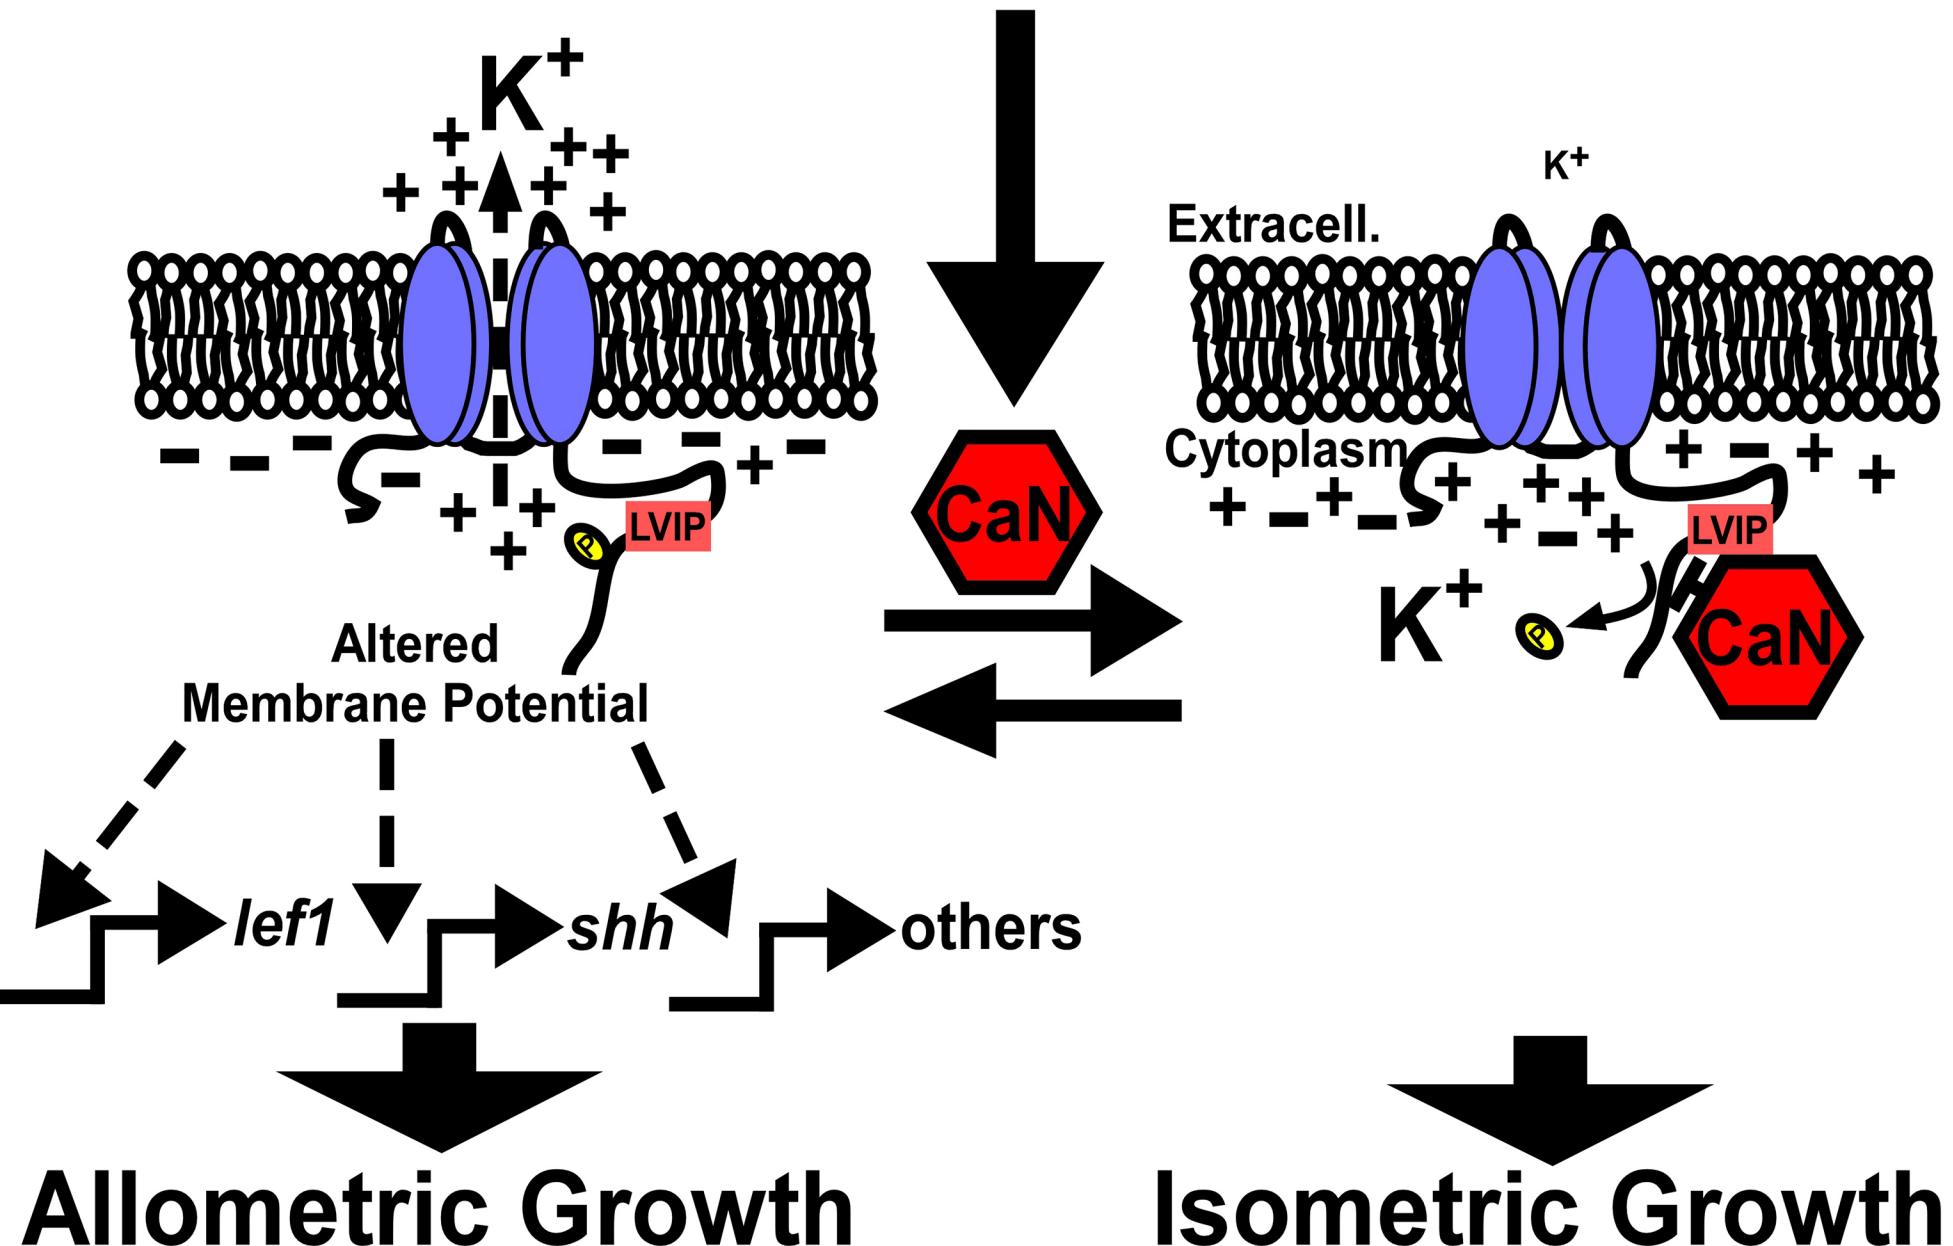

**Table 1 qRT-PCR primer sequences for zebrafish genes**

|                    |                           |
|--------------------|---------------------------|
| F-lef1             | AATGATCCCGTTCAAAGACG      |
| R-lef1             | CGCTAAGTCTCCCTCCTCCT      |
| F-shha             | CCACTACGAGGGAAGAGCTG      |
| R-shha             | GAGCAATGAATGTGGGCTTT      |
| F-aldh1a2          | AACCACTGAACACGGACCTC      |
| R-aldh1a2          | CTCCAGTTTGGCTCCTTCAG      |
| F-pea3             | AGAAGAACCGTCCAGCCATGA     |
| R-pea3             | AACATAACGCTCACCAGCCAC     |
| F-msxb             | ACACTTTGTCGAGCGTTTCGG     |
| R-msxb             | TCTTGTGCTTGCGTAAGGTGC     |
| F-ptch1            | GGGCAGCTAATCTGGAGACGG     |
| R-ptch1            | GCGCCTCTACGGTCAAATG       |
| F-ptch2            | TGCCACGCCGCTTTTGCTTT      |
| R-ptch2            | GTTTCAATGGCAGCGACCCG      |
| F-bmp2a            | GCAGAGCCAACACTATCAGGAG    |
| R-bmp2a            | CCACTTTAATACAGCAGGAGTTACG |
| F-axin2            | GGACACTTCAAGGAACAACACTAC  |
| R-axin2            | CCTCATAATTGGCAGAACTG      |
| F-cmyc             | TAACAGCTCCAGCAGCAGTG      |
| R-cmyc             | GCTTCAAACACTAGGGGACTG     |
| F-cyclinD1         | GCCAAACTGCCTATACATCAG     |
| R-cyclinD1         | TGTCGGTGCTTTTCAGGTAC      |
| F- $\beta$ -actin2 | GCAGAAGGAGATCACATCCCTGGC  |
| R- $\beta$ -actin2 | CATTGCCGTCACCTTCACCGTTC   |
| F-kenk5b           | ATCACTCTCCTCGTCTGCAACG    |
| R-kenk5b           | GAGTCCCATGCACAACGTGCAG    |
| F-GFP              | AAGGGCATCGACTTCAAGG       |
| R-GFP              | TGCTTGTCGGCCATGATATAG     |

**Table 2 qRT-PCR primers for human genes**

|           |                          |
|-----------|--------------------------|
| F-lef1    | CTACCCATCCTCACTGTCAGTC   |
| R-lef1    | GGATGTTCCCTGTTTGACCTGAGG |
| F-shh     | CCGAGCGATTTAAGGAACTCACC  |
| R-shh     | AGCGTTCAACTTGTCCTTACACC  |
| F-aldh1a2 | GAGTAACTCTGGA ACTTGGAGGC |
| R-aldh1a2 | ATGGACTCCTCCACGAAGATGC   |
| F-pea3    | AGGAACAGACGGACTTCGCCTA   |
| R-pea3    | CTGGGAATGGTCGCAGAGGTTT   |
| F-msx1    | GACTCCTCAAGCTGCCAGAAGA   |
| R-msx1    | ACGGTTCGTCTTGTGTTTGCGG   |
| F-GAPDH   | GTCTCCTCTGACTTCAACAGCG   |
| R-GAPDH   | ACCACCCTGTTGCTGTAGCCAA   |

**Table 3: primer sequences for qPCR genotyping**

|                  |                                |
|------------------|--------------------------------|
| <u>F-mCherry</u> | <u>GGCCATCATCAAGGAGTTCATGC</u> |
| <u>R-mCherry</u> | <u>GAGGGGAAGTTGGTGCCGC</u>     |
| <u>F-β-actin</u> | <u>GAGCTGCAGTCTAAGCTTTGACC</u> |
| <u>R-β-actin</u> | <u>CATTGCCGTCACCTTCACCGTTC</u> |

**Table 4: primer sequences for mouse qPCR**

|                  |                                |
|------------------|--------------------------------|
| <u>F-lef1</u>    | <u>ACTGTCAGGCGACACTTCCATG</u>  |
| <u>R-lef1</u>    | <u>GTGCTCCTGTTTGACCTGAGGT</u>  |
| <u>F-shh</u>     | <u>GGATGAGGAAAACACGGGAGCA</u>  |
| <u>R-shh</u>     | <u>TCATCCCAGCCCTCGGTCACT</u>   |
| <u>F-aldh1a2</u> | <u>CACAAGACACGAGCCCATTGGA</u>  |
| <u>R-aldh1a2</u> | <u>GGTTTGATGACCACGGTGTTACC</u> |
| <u>F-pea3</u>    | <u>CACAGACTTCGCCTACGACTCA</u>  |
| <u>R-pea3</u>    | <u>GCAGACATCATCTGGGAATGGTC</u> |

|                |                                |
|----------------|--------------------------------|
| <u>F-msx1</u>  | <u>AGGACTCCTCAAGCTGCCAGAA</u>  |
| <u>R-msx1</u>  | <u>CGGTTGGTCTTGTGCTTGCCTA</u>  |
| <u>F-GAPDH</u> | <u>CATCACTGCCACCCAGAAGACTG</u> |
| <u>R-GAPDH</u> | <u>ATGCCAGTGAGCTTCCCGTTCAG</u> |
